# Supplementary material for: The Mycobacterium tuberculosis Drugome and Its Polypharmacological Implications
Source: PLoS Comput Biol. 2010 Nov 4;6(11):e1000976. doi: 10.1371/journal.pcbi.1000976 (PMC2973814; doi:10.1371/journal.pcbi.1000976)
Supplement: Table S1 — Information about the approved drug binding sites used in the TB-drugome. This file contains information about the 274 approved drugs that were identified in the PDB. For each drug, its name, PDB ligand code, isomeric SMILES string and known targets are listed, and the PDB codes of the protein structures with which it has been crystallized are given. (0.09 MB XLS) [file pcbi.1000976.s006.xls]

## Sheet: Sheet1
Drug name	Ligand code in PDB	Isomeric SMILES	No. of sites in PDB	PDB codes	No. of known targets	Targets
4-Hydroxytamoxifen	OHT	CC/C(=C(\c1ccc(cc1)O)/c2ccc(cc2)OCCN(C)C)/c3ccccc3	9	1S9Q, 1VJB, 2BJ4, 2FSZ, 2GPU, 2GPV, 2JF9, 2P7Z, 3ERT	5	Estrogen receptor
Acarbose	ACR, QPS	C[C@@H]1[C@H]([C@@H]([C@H]([C@H](O1)O[C@@H]2[C@H](O[C@@H]([C@@H]([C@H]2O)O)O[C@@H]3[C@H](O[C@@H]([C@@H]([C@H]3O)O)O)CO)CO)O)O)N[C@H]4C=C([C@H]([C@@H]([C@H]4O)O)O)CO, C[C@@H]1[C@H]([C@@H]([C@H]([C@H](O1)O[C@@H]2[C@H](O[C@@H]([C@@H]([C@H]2O)O)O[C@@H]3[C@H](O[C@H]([C@@H]([C@H]3O)O)O)CO)CO)O)O)N[C@H]4C=C([C@H]([C@@H]([C@H]4O)O)O)CO	18	1AGM, 1DED, 1ESW, 1GAH, 1K1Y, 1KXH, 1LF9, 1MXD, 1MXG, 1ULV, 2ECP, 2F6D, 2OWC, 2OWW, 2QMJ, 2QPU, 2ZQ0, 3BC9	4	Maltase-glucoamylase, intestinal
Acetaminophen	TYL	CC(=O)Nc1ccc(cc1)O	5	1TYL, 1TYM, 2DPZ, 2OCU, 3DJI	2	Prostaglandin G/H synthase 1
Acetazolamide	AZM	CC(=O)Nc1nnc(s1)S(=O)(=O)N	13	1AZM, 1DMY, 1JD0, 1RJ6, 1YDA, 1YDB, 1YDD, 1ZSB, 2H4N, 2UY4, 3CZV, 3DC3, 3IAI	5	Carbonic anhydrase 1
Acetylcholine	ACH	CC(=O)OCC[N+](C)(C)C	4	2ACE, 2HA4, 2J0H, 2RIN	1	Acetylcholinesterase
Acetylcysteine	SC2	CC(=O)N[C@@H](CS)C(=O)O	3	2J1G, 2J2P, 2J58	?
Adefovir	5HG	c1nc(c2c(n1)n(cn2)CCOCP(=O)(O)O)N	1	2G1A	1	P protein (Includes: DNA-directed DNA polymerase)
Alendronate	AHD	C(CC(O)(P(=O)([O-])[O-])P(=O)([O-])[O-])CN	2	1YHM, 2F92	3	Farnesyl pyrophosphate synthetase
Aliskiren	C41	CC(C)[C@@H](Cc1ccc(c(c1)OCCCOC)OC)C[C@@H]([C@H](C[C@@H](C(C)C)C(=O)NCC(C)(C)C(=O)N)O)N	1	2V0Z	2	Renin
Aliretinoin	REA	CC1=C(C(CCC1)(C)C)\C=C\C(=C\C=C\C(=C\C(=O)O)\C)\C	29	1CBR, 1CBS, 1EPB, 1FBY, 1FEM, 1FM6, 1FM9, 1G5Y, 1GX9, 1K74, 1N4H, 1RLB, 1TYR, 1XDK, 1XIU, 1XLS, 2ACL, 2FR3, 2G78, 2LBD, 2NNH, 2VE3, 3CWK, 3DZU, 3DZY, 3E00, 3FAL, 3FC6, 3LBD	9	Retinoic acid receptor gamma-1
Amantadine	308	C1C2CC3CC1CC(C2)(C3)N	2	2KAD, 3C9J	3	D(2) dopamine receptor
Amiloride	AMR	c1(c(nc(c(n1)Cl)N)N)C(=O)NC(=N)N	1	1F5L	9	Amiloride-sensitive sodium channel subunit beta
Aminocaproic Acid	ACA	C(CCC(=O)O)CCN	13	1CEA, 1HPK, 1ILP, 1ILQ, 1PK2, 2DCF, 2PK4, 2ZM7, 2ZM8, 2ZM9, 2ZMA, 3A2Q, 3KIV	3	Plasminogen
Aminosalicylic Acid	BHA	c1cc(c(cc1N)O)C(=O)O	3	1PBC, 1PBF, 1SXK	3	2-amino-4-hydroxy-6-hydroxymethyldihydropteridine pyrophosphokinase
Amodiaquine	CQA	CCN(CC)Cc1cc(ccc1O)Nc2ccnc3c2ccc(c3)Cl	1	2AOU	2	Histamine N-methyltransferase
Ampicillin	AIC, AIX	CC1([C@@H](N2[C@H](S1)[C@@H](C2=O)NC(=O)[C@@H](c3ccccc3)N)C(=O)O)C, CC1([C@@H](N[C@H](S1)[C@@H](C=O)NC(=O)[C@@H](c2ccccc2)N)C(=O)O)C	6	1H8S, 1NX9, 2EX6, 2RDD, 3ITA, 3ITA	1	Penicillin-binding proteins 1A/1B
Amprenavir	478	CC(C)C[N@](C[C@H]([C@H](Cc1ccccc1)NC(=O)O[C@H]2CCOC2)O)S(=O)(=O)c3ccc(cc3)N	5	1HPV, 1T7J, 3EKP, 3EKV, 3EM3	1	HIV-1 protease
Argatroban	MIT	C[C@@H]1CCN([C@H](C1)C(=O)O)C(=O)[C@H](CCCNC(=[NH2+])N)NS(=O)(=O)c2cccc3c2NC[C@@H](C3)C	1	1DWC	1	Prothrombin
Aspirin	AIN	CC(=O)Oc1ccccc1C(=O)O	5	1OXR, 1TGM, 2QQT, 3GCL, 3IAZ	4	Prostaglandin G/H synthase 1
Atazanavir	DR7	CC(C)(C)[C@@H](C(=O)N[C@@H](Cc1ccccc1)[C@H](CN(Cc2ccc(cc2)c3ccccn3)NC(=O)[C@H](C(C)(C)C)NC(=O)OC)O)NC(=O)OC	9	2AQU, 2FXD, 2FXE, 2O4K, 3EKW, 3EKY, 3EL1, 3EL9, 3EM4	2	HIV-1 protease
Atenolol	2TN	CC(C)NCC(COc1ccc(cc1)CC(=O)N)O	3	2NUV, 2OTF, 2OUB	1	Beta-1 adrenergic receptor
Atorvastatin	117	CC(C)c1c(c(c(n1CC[C@H](C[C@H](CC(=O)O)O)O)c2ccc(cc2)F)c3ccccc3)C(=O)Nc4ccccc4	1	1HWK	17	Serum paraoxonase/arylesterase 1
Atropine	OIN	CN1[C@H]2CC[C@@H]1CC(C2)OC(=O)[C@H](CO)c3ccccc3	2	1TH6, 2ARM	7	Muscarinic acetylcholine receptor M2
Azelaic Acid	AZ1	C(CCCC(=O)O)CCCC(=O)O	1	1TUF	6	3-oxo-5-alpha-steroid 4-dehydrogenase 2
Aztreonam	AZR	C[C@H]1[C@@H](C(=O)N1S(=O)(=O)O)NC(=O)C(=NOC(C)(C)C(=O)O)c2csc(n2)N	2	1FR6, 2ZQC	2	Penicillin-binding protein 3
Bepridil	BEP	CC(C)COC[C@H](C[N@@](Cc1ccccc1)c2ccccc2)N3CCCC3	2	1DTL, 1LXF	6	Voltage-dependent P/Q-type calcium channel subunit alpha-1A
Bexarotene	9RA	Cc1cc2c(cc1C(=C)c3ccc(cc3)C(=O)O)C(CCC2(C)C)(C)C	1	3H0A	1	Retinoic acid receptor RXR-beta
Bicalutamide	198	C[C@](CS(=O)(=O)c1ccc(cc1)F)(C(=O)Nc2ccc(c(c2)C(F)(F)F)C#N)O	1	1Z95	3	Androgen receptor
Bimatoprost	15M	CCNC(=O)CCC\C=C/C[C@H]1[C@H](C[C@H]([C@@H]1\C=C\[C@H](CCc2ccccc2)O)O)O	1	2F38	3	Prostaglandin F2-alpha receptor
Bortezomib	BO2	B([C@H](CC(C)C)NC(=O)[C@H](Cc1ccccc1)NC(=O)c2cnccn2)(O)O	1	2F16	5	26S proteasome non-ATPase regulatory subunit 2
Brinzolamide	BZ1	CCN[C@H]1C[N@@](S(=O)(=O)c2c1cc(s2)S(=O)(=O)N)CCCOC	1	3ZNC	2	Carbonic anhydrase 1
Caffeine	CFF	Cn1cnc2c1C(=O)N(C(=O)N2C)C	8	1C8L, 1GFZ, 1L5Q, 1L7X, 2A3B, 3DD1, 3DDS, 3DDW	3	Adenosine A1 receptor
Calcipotriene	MC9	C[C@H](\C=C\[C@H](C1CC1)O)[C@H]2CC[C@@H]\3[C@@]2(CCC/C3=C\C=C/4\C[C@H](C[C@@H](C4=C)O)O)C	1	1S19	1	Vitamin D3 receptor
Captopril	MCO	C[C@H](CS)C(=O)N1CCC[C@@H]1C(=O)O	6	1J37, 1JT1, 1M2X, 1UZF, 2FU8, 2QDS	4	Angiotensin-converting enzyme, testis-specific isoform
Carbachol	CCE	C[N+](C)(C)CCOC(=O)N	1	1UV6	3	Muscarinic acetylcholine receptor M1
Carbidopa	142	C[C@](Cc1ccc(c(c1)O)O)(C(=O)O)NN	1	1JS3	1	Aromatic-L-amino-acid decarboxylase
Cefoxitin	CFX	CO[C@@]1([C@@H]2N(C1=O)C(=C(CS2)COC(=O)N)C(=O)O)NC(=O)Cc3cccs3	2	1I2W, 1YMX	3	Beta-lactamase
Celecoxib	CEL	Cc1ccc(cc1)c2cc(nn2c3ccc(cc3)S(=O)(=O)N)C(F)(F)F	1	1OQ5	2	Prostaglandin G/H synthase 2
Cephalothin	CLS	CC(=O)OCC1=C(N2[C@@H]([C@@H](C2=O)NC(=O)Cc3cccs3)SC1)C(=O)O	2	1KVL, 2ZQ9	5	Serum albumin
Cerivastatin	116	CC(C)c1c(c(c(c(n1)C(C)C)COC)c2ccc(cc2)F)CC[C@H](C[C@H](CC(=O)O)O)O	1	1HWJ	1	3-hydroxy-3-methylglutaryl-coenzyme A reductase
Cetyl Alcohol	PL3	CCCCCCCCCCCCCCCCO	2	2UUU, 2UUV	?
Chenodiol	JN3	C[C@H](CCC(=O)O)[C@H]1CC[C@@H]2[C@@]1(CC[C@H]3[C@H]2[C@@H](C[C@H]4[C@@]3(CC[C@H](C4)O)C)O)C	1	2JN3	1	Nuclear receptor, subfamily 1, group H, member 4
Chlorambucil	CBL	c1cc(ccc1CCCC(=O)O)N(CCCl)CCCl	1	3CSJ	1	DNA
Chloramphenicol	CLM	c1cc(ccc1[C@H]([C@@H](CO)NC(=O)C(Cl)Cl)O)[N+](=O)[O-]	10	1CLA, 1QHS, 1QHY, 1USQ, 2JKJ, 2JKL, 2UXP, 2XAT, 3CLA, 4CLA	6	50S ribosomal protein L10
Chloroquine	CLQ	CCN(CC)CCC[C@@H](C)Nc1ccnc2c1ccc(c2)Cl	1	1CET	4	Hemoglobin subunit alpha
Chlorthalidone	KLT	c1ccc2c(c1)C(=O)N[C@@]2(c3ccc(c(c3)S(=O)(=O)N)Cl)O	1	3F4X	1	Solute carrier family 12 member 1
Chlorzoxazone	CLW	c1cc2c(cc1Cl)NC(=O)O2	2	1M8D, 1M9J	1	Calcium-activated potassium channel subunit alpha 1
Cidofovir	CFV	C1=CN(C(=O)N=C1N)C[C@H](CO)OCP(=O)(O)O	1	3EOR	1	DNA polymerase
Cilastatin	CIL	CC1(C[C@@H]1C(=O)N/C(=C\CCCCSC[C@H](C(=O)O)N)/C(=O)O)C	1	1ITU	1	Dipeptidase 1
Ciprofloxacin	CPF	c1c2c(cc(c1F)N3CCNCC3)N(C=C(C2=O)C(=O)O)C4CC4	2	1OYE, 1T9U	5	DNA gyrase subunit A
Cisplatin	NCP	N[Pt](N)(Cl)Cl	1	2AEO	1	DNA
Cladribine	CL9	c1nc2c(nc(nc2n1[C@H]3C[C@@H]([C@H](O3)CO)O)Cl)N	2	2ZI9, 2ZIA	3	Purine nucleoside phosphorylase
Clavulanate	J01	C1[C@@H]2N(C1=O)[C@H](/C(=C/CO)/O2)C(=O)O	1	2JAP	1	Beta-lactamase
Clindamycin	CLY	CCC[C@@H]1C[C@H]([N@@](C1)C)C(=O)N[C@@H]([C@@H]2[C@@H]([C@@H]([C@H]([C@H](O2)SC)O)O)O)[C@H](C)Cl	1	3JZ0	1	50S ribosomal protein L10
Clofarabine	CFB	c1nc2c(nc(nc2n1[C@H]3[C@H]([C@@H]([C@H](O3)CO)O)F)Cl)N	1	2A7Q	2	DNA polymerase alpha catalytic subunit
Clomipramine	CXX	CN(C)CCCN1c2ccccc2CCc3c1cc(cc3)Cl	2	2Q6H, 2QEI	4	Sodium-dependent serotonin transporter
Clonidine	CLU	c1cc(c(c(c1)Cl)N=C2NCCN2)Cl	1	2PNC	2	Alpha-2A adrenergic receptor
Clotrimazole	CL6	c1ccc(cc1)C(c2ccccc2)(c3ccccc3Cl)n4ccnc4	1	2VRV	2	Cytochrome P450 51
Cloxacillin	CXN	Cc1c(c(no1)c2ccccc2Cl)C(=O)N[C@H]3[C@@H]4N(C3=O)[C@H](C(S4)(C)C)C(=O)O	1	1FCM	3	Penicillin-binding proteins 1A/1B
Colchicine	LOC	CC(=O)N[C@H]1CCc2cc(c(c(c2C3=CC=C(C(=O)C=C13)OC)OC)OC)OC	1	3E22	4	Tubulin beta-1 chain
Cycloserine	4AX	C1[C@H](C(=O)NO1)N	2	1PB9, 1XQL	2	D-alanine--D-alanine ligase A
Cyclosporine	EOV	CC[C@H]1C(=O)N(CC(=O)N([C@H](C(=O)N[C@H](C(=O)N([C@H](C(=O)N[C@H](C(=O)N[C@@H](C(=O)N([C@H](C(=O)N([C@H](C(=O)N([C@H](C(=O)N([C@H](C(=O)N1)[C@@H]([C@H](C)CC=CC)O)C)C(C)C)C)CC(C)C)C)CC(C)C)C)C)C)CC(C)C)C)C(C)C)CC(C)C)C)C	1	3EOV	5	Calcium signal-modulating cyclophilin ligand
Cyclothiazide	CYZ	c1c2c(cc(c1Cl)S(=O)(=O)N)S(=O)(=O)N[C@H](N2)[C@H]3C[C@@H]4C[C@H]3C=C4	2	1LBC, 3H6T	6	Sodium/potassium-transporting ATPase gamma chain
Cytarabine	AR3, CTN	C1=CN(C(=O)N=C1N)[C@H]2[C@H]([C@@H]([C@H](O2)CO)O)O, C1=CN(C(=O)N=C1N)[C@H]2[C@@H]([C@@H]([C@H](O2)CO)O)O	5	1P5Z, 1UEJ, 2FR6, 2V34, 3IVE	2	DNA polymerase beta
Dalfopristin	DOL	CCN(CC)CCS(=O)(=O)[C@@H]1CCN2[C@H]1C(=O)O[C@@H]([C@@H](\C=C\C(=O)NC/C=C/C(=C/[C@H](CC(=O)Cc3nc(co3)C2=O)O)/C)C)C(C)C	2	1MRL, 2Z2P	1	Streptogramin A acetyltransferase
Darunavir	017	CC(C)C[N@@](C[C@H]([C@H](Cc1ccccc1)NC(=O)O[C@H]2CO[C@@H]3[C@H]2CCO3)O)S(=O)(=O)c4ccc(cc4)N	19	1T3R, 1T7I, 2F80, 2F81, 2F8G, 2HS1, 2HS2, 2IDW, 2IEN, 2IEO, 3BVB, 3CYW, 3D1Z, 3D20, 3EBZ, 3EKT, 3EM6, 3GGT, 3GGU	2	HIV-1 protease
Dasatinib	1N1	Cc1cccc(c1NC(=O)c2cnc(s2)Nc3cc(nc(n3)C)N4CCN(CC4)CCO)Cl	3	2GQG, 2ZVA, 3G5D	10	Signal transducer and activator of transcription 5B
Daunorubicin	DM1	C[C@H]1[C@H]([C@H](C[C@@H](O1)O[C@H]2C[C@@](Cc3c2c(c4c(c3O)C(=O)c5cccc(c5C4=O)OC)O)(C(=O)C)O)N)O	1	3F8F	3	DNA
Decamethonium	DME	C[N+](C)(C)CCCCCCCCCC[N+](C)(C)C	2	1ACL, 1MAA	2	Neuronal acetylcholine receptor subunit alpha-2
Delavirdine	SPP	CC(C)Nc1cccnc1N2CCN(CC2)C(=O)c3cc4cc(ccc4[nH]3)NS(=O)(=O)C	1	1KLM	1	Gag-Pol polyprotein
Desipramine	DSM	CNCCCN1c2ccccc2CCc3c1cccc3	2	2QB4, 2QJU	8	Muscarinic acetylcholine receptor M1
Desoxycorticosterone	1CA	C[C@]12CC[C@H]3[C@H]([C@@H]1CC[C@@H]2C(=O)CO)CCC4=CC(=O)CC[C@]34C	4	1Y9R, 2AA7, 2ABI, 2Q3Y	1	Mineralocorticoid receptor
Dexamethasone	DEX	C[C@@H]1C[C@H]2[C@@H]3CCC4=CC(=O)C=C[C@@]4([C@]3([C@H](C[C@@]2([C@]1(C(=O)CO)O)C)O)F)C	3	1M2Z, 1P93, 3GN8	6	Glucocorticoid receptor
Dexrazoxane	CDX	C[C@H](CN1CC(=O)NC(=O)C1)N2CC(=O)NC(=O)C2	1	1QZR	1	DNA topoisomerase 2-alpha
Diazepam	DZP	CN1c2ccc(cc2C(=NCC1=O)c3ccccc3)Cl	1	2BXF	4	Translocator protein
Dichlorphenamide	I7A	c1c(cc(c(c1S(=O)(=O)N)Cl)Cl)S(=O)(=O)N	1	2POU	1	Carbonic anhydrase 1
Diclofenac	DIF	c1ccc(c(c1)CC(=O)O)Nc2c(cccc2Cl)Cl	7	1DVX, 1NR6, 1PXX, 1SV9, 2B17, 3CFQ, 3IB0	3	Prostaglandin G/H synthase 1
Didanosine	2DI	c1nc2c(n1[C@H]3CC[C@H](O3)CO)N=CNC2=O	1	1V3Q	1	Gag-Pol polyprotein
Diethylstilbestrol	DES	CC/C(=C(/CC)\c1ccc(cc1)O)/c2ccc(cc2)O	4	1S9P, 1TT6, 1TZ8, 3ERD	4	Estrogen receptor
Diflunisal	1FL	c1cc(c(cc1c2ccc(cc2F)F)C(=O)O)O	2	2BXE, 3D2T	4	Prostaglandin G/H synthase 1
Digoxin	DGX	C[C@@H]1[C@H]([C@H](C[C@H](O1)O[C@@H]2[C@H](O[C@@H](C[C@@H]2O)O[C@@H]3[C@H](O[C@H](C[C@@H]3O)O[C@H]4CC[C@]5([C@@H](C4)CC[C@@H]6[C@@H]5C[C@H]([C@]7([C@@]6(CC[C@@H]7C8=CC(=O)OC8)O)C)O)C)C)C)O)O	1	1IGJ	2	Sodium/potassium-transporting ATPase alpha-1 chain
Diphenhydramine	2PM	CN(C)CCOC(c1ccccc1)c2ccccc2	1	2AOT	1	Histamine H1 receptor
Docetaxel	TXL	CC1=C2[C@H](C(=O)[C@@]3([C@H](C[C@@H]4[C@]([C@H]3[C@@H]([C@@](C2(C)C)(C[C@@H]1OC(=O)[C@@H]([C@H](c5ccccc5)NC(=O)OC(C)(C)C)O)O)OC(=O)c6ccccc6)(CO4)OC(=O)C)O)C)O	2	1IA0, 1TUB	2	Apoptosis regulator Bcl-2
Donepezil	E20	COc1cc2c(cc1OC)C(=O)[C@@H](C2)CC3CCN(CC3)Cc4ccccc4	1	1EVE	2	Acetylcholinesterase
Dopamine	LDP	c1cc(c(cc1CCN)O)O	4	2A3R, 2QMZ, 2VQ5, 5PAH	3	D(1A) dopamine receptor
Dorzolamide	ETS	CCN[C@H]1C[C@@H](S(=O)(=O)c2c1cc(s2)S(=O)(=O)N)C	1	1CIL	1	Carbonic anhydrase 2
Doxorubicin	DM2	C[C@H]1[C@H]([C@H](C[C@@H](O1)O[C@H]2C[C@@](Cc3c2c(c4c(c3O)C(=O)c5cccc(c5C4=O)OC)O)(C(=O)CO)O)N)O	2	1I1E, 2DR6	2	DNA topoisomerase 2-alpha
Econazole	ECN, EKO	c1cc(ccc1CO[C@H](Cn2ccnc2)c3ccc(cc3Cl)Cl)Cl, c1cc(ccc1CO[C@H](Cc2c[nH]cn2)c3ccc(cc3Cl)Cl)Cl	2	2UVN, 3IW2	1	Cytochrome P450 51
Edrophonium	EDR	CC[N+](C)(C)c1cccc(c1)O	2	1AX9, 2ACK	1	Acetylcholinesterase
Efavirenz	EFZ	c1cc2c(cc1Cl)[C@@](OC(=O)N2)(C#CC3CC3)C(F)(F)F	5	1FK9, 1FKO, 1IKV, 1IKW, 1JKH	1	Gag-Pol polyprotein
Eflornithine	DMO	C(CC(C(F)F)(C(=O)O)N)CN	1	2TOD	1	Ornithine decarboxylase
Emtricitabine	ETV	C1[C@H](O[C@H](S1)CO)N2C=C(C(=NC2=O)N)F	1	2NO6	1	Gag-Pol polyprotein
Enalaprilat	EAL	C[C@@H](C(=O)N1CCC[C@H]1C(=O)O)N[C@@H](CCc2ccccc2)C(=O)O	1	1UZE	2	Angiotensin-converting enzyme, testis-specific isoform
Epinephrine	ALE	CNC[C@H](c1ccc(c(c1)O)O)O	2	2HKK, 3PAH	4	Alpha-1A adrenergic receptor
Erlotinib	AQ4	COCCOc1cc2c(cc1OCCOC)ncnc2Nc3cccc(c3)C#C	1	1M17	1	Epidermal growth factor receptor
Erythromycin	ERY	CC[C@@H]1[C@@]([C@@H]([C@H](C(=O)[C@@H](C[C@@]([C@@H]([C@H]([C@@H]([C@H](C(=O)O1)C)O[C@H]2C[C@@]([C@H]([C@@H](O2)C)O)(C)OC)C)O[C@H]3[C@@H]([C@H](C[C@H](O3)C)N(C)C)O)(C)O)C)C)O)(C)O	3	2IYF, 2J0D, 3FRQ	3	23S rRNA
Estradiol	EST	C[C@]12CC[C@@H]3c4ccc(cc4CC[C@H]3[C@@H]1CC[C@@H]2O)O	21	1A27, 1A52, 1AQU, 1E6W, 1ERE, 1FDS, 1FDT, 1FDU, 1FDW, 1G50, 1GWR, 1IOL, 1JGL, 1JNN, 1LHU, 1PCG, 1QKT, 1QKU, 2D06, 2J7X, 2OCF	4	Estrogen receptor
Ethacrynic Acid	EAA	CCC(=C)C(=O)c1ccc(c(c1Cl)Cl)OCC(=O)O	7	11GS, 1GSE, 1GSF, 2GSS, 3DGQ, 3GSS, 3HJO	4	Solute carrier family 12 member 1
Ethoxzolamide	EZL	CCOc1ccc2c(c1)sc(n2)S(=O)(=O)N	3	3CAJ, 3DCW, 3DD0	1	Carbonic anhydrase 1
Etravirine	65B	Cc1cc(cc(c1Oc2c(c(nc(n2)Nc3ccc(cc3)C#N)N)Br)C)C#N	1	1SV5	1	HIV-1 selective RNA-directed DNA polymerase
Febuxostat	TEI	Cc1c(sc(n1)c2ccc(c(c2)C#N)OCC(C)C)C(=O)O	1	1N5X	1	Xanthine dehydrogenase
Finasteride	FIT	C[C@]12CC[C@H]3[C@H]([C@@H]1CC[C@@H]2C(=O)NC(C)(C)C)CC[C@@H]4[C@@]3(C=CC(=O)N4)C	1	3G1R	2	3-oxo-5-alpha-steroid 4-dehydrogenase 1
Fluconazole	TPF	c1cc(c(cc1F)F)C(Cn2cncn2)(Cn3cncn3)O	6	1EA1, 2IJ7, 2WUZ, 2WV2, 2WX2, 3KHM	2	Cytochrome P450 51
Fludarabine	2FA	c1nc2c(nc(nc2n1[C@H]3[C@@H]([C@@H]([C@H](O3)CO)O)O)F)N	4	1PK9, 1Z35, 2PKK, 2ZJ0	5	DNA polymerase alpha catalytic subunit
Fludrocortisone	ZK5	C[C@]12CCC(=O)C=C1CC[C@@H]3[C@@]2([C@H](C[C@]4([C@H]3CC[C@@]4(C(=O)CO)O)C)O)F	1	1GS4	1	Mineralocorticoid receptor
Fluorodeoxyuridylate	UFP	C1[C@@H]([C@H](O[C@H]1N2C=C(C(=O)NC2=O)F)COP(=O)(O)O)O	11	1B02, 1BJG, 1O28, 1O29, 1TDB, 1TLS, 1TSN, 1VZC, 1VZD, 2TDD, 3GWC	4	Thymidylate synthase
Fluorouracil	URF	C1=C(C(=O)NC(=O)N1)F	3	1H7X, 1RXC, 1UPF	4	Thymidylate synthase
Fluoxetine	RFX, SFX	CNCC[C@H](c1ccccc1)Oc2ccc(cc2)C(F)(F)F, CNCC[C@@H](c1ccccc1)Oc2ccc(cc2)C(F)(F)F	2	3GWV, 3GWW	1	Sodium-dependent serotonin transporter
Flurbiprofen	FLP	C[C@@H](c1ccc(c(c1)F)c2ccccc2)C(=O)O	6	1CQE, 1DVT, 1EQH, 1R9O, 2AYL, 3PGH	3	Prostaglandin G/H synthase 2
Fluvastatin	115	CC(C)n1c2ccccc2c(c1CC[C@H](C[C@H](CC(=O)O)O)O)c3ccc(cc3)F	1	1HWI	1	3-hydroxy-3-methylglutaryl-coenzyme A reductase
Fomepizole	4PZ	Cc1c[nH]nc1	1	3E4E	4	Alcohol dehydrogenase 1A
Fondaparinux	NTO	CO[C@@H]1[C@@H]([C@H]([C@@H]([C@H](O1)COS(=O)(=O)O)O[C@H]2[C@@H]([C@H]([C@@H]([C@@H](O2)C(=O)O)O[C@@H]3[C@@H]([C@H]([C@@H]([C@H](O3)COS(=O)(=O)O)O[C@H]4[C@@H]([C@H]([C@@H]([C@H](O4)C(=O)O)O[C@@H]5[C@@H]([C@H]([C@@H]([C@H](O5)COS(=O)(=O)O)O)O)NS(=O)(=O)O)O)O)OS(=O)(=O)O)NS(=O)(=O)O)O)OS(=O)(=O)O)O)NS(=O)(=O)O	2	2GD4, 3EVJ	1	Antithrombin-III
Foscarnet	PPF	C(=O)(O)P(=O)(O)O	4	1EI6, 1NKI, 2IT4, 2RK8	2	DNA polymerase
Fosfomycin	FCN	C[C@H]1[C@H](O1)P(=O)(O)O	4	1LQP, 1UAE, 2BNN, 3D41	1	UDP-N-acetylglucosamine 1-carboxyvinyltransferase
Furosemide	FUN	c1cc(oc1)CNc2cc(c(cc2C(=O)O)S(=O)(=O)N)Cl	1	1Z9Y	2	Solute carrier family 12 member 1
Gabapentin	GBN	C1CCC(CC1)(CC(=O)O)CN	4	2A1H, 2COI, 2COJ, 2EJ3	6	Adenosine A1 receptor
Galantamine	GNT	C[N@@]1CC[C@@]23C=C[C@@H](C[C@@H]2Oc4c3c(ccc4OC)C1)O	5	1DX6, 1QTI, 1W6R, 1W76, 2PH9	2	Acetylcholinesterase
Gallamine Triethiodide	GMN	CC[N+](CC)(CC)CCOc1cccc(c1OCC[N+](CC)(CC)CC)OCC[N+](CC)(CC)CC	1	1N5M	3	Neuronal acetylcholine receptor subunit alpha-2
Ganciclovir	GA2	c1nc2c(n1COC(CO)CO)N=C(NC2=O)N	1	1KI2	2	DNA polymerase
Gefitinib	IRE	COc1cc2c(cc1OCCCN3CCOCC3)/C(=N/c4ccc(c(c4)Cl)F)/N=CN2	3	2ITO, 2ITY, 2ITZ	1	Epidermal growth factor receptor
Gemcitabine	GEO	C1=CN(C(=O)N=C1N)[C@H]2C([C@@H]([C@H](O2)CO)O)(F)F	3	1P62, 2NO0, 2VPP	3	Ribonucleoside-diphosphate reductase large subunit
Gentamicin	LLL	C[C@@]1(CO[C@@H]([C@@H]([C@H]1NC)O)O[C@H]2[C@@H](C[C@@H]([C@H]([C@@H]2O)O[C@@H]3[C@@H](CC[C@H](O3)CN)N)N)N)O	1	3HAM	3	30S ribosomal protein S12
Halothane	HLT	[C@@H](C(F)(F)F)(Cl)Br	4	1E7B, 1E7C, 1XZ1, 2JST	14	Rhodopsin
Hexachlorophene	H3P	c1c(c(c(c(c1Cl)Cl)Cc2c(c(cc(c2Cl)Cl)Cl)O)O)Cl	1	3ETE	1	D-lactate dehydrogenase
Histamine	HSM	c1c(nc[nH]1)CCN	10	1AVN, 1IKE, 1JQD, 1KAR, 1NP1, 1QFT, 1QFV, 1U18, 2QEB, 3BU1	3	Histamine H2 receptor
Homatropine	HTQ	CN1[C@H]2CC[C@@H]1CC(C2)OC(=O)[C@@H](c3ccccc3)O	2	1MX5, 2DQZ	5	Muscarinic acetylcholine receptor M3
Hydrochlorothiazide	HCZ	c1c2c(cc(c1Cl)S(=O)(=O)N)S(=O)(=O)NCN2	2	3IJX, 3IK6	5	Solute carrier family 12 member 3
Hydrocortisone	HCY	C[C@]12CCC(=O)C=C1CC[C@@H]3[C@@H]2[C@H](C[C@]4([C@H]3CC[C@@]4(C(=O)CO)O)C)O	2	2V95, 2VDY	6	Annexin A1
Hydroflumethiazide	HFZ	c1c(c(cc2c1NCNS2(=O)=O)S(=O)(=O)N)C(F)(F)F	1	3ILU	6	Solute carrier family 12 member 1
Hydroxyamphetamine	AEG	C[C@H](Cc1ccc(cc1)O)N	1	3BUF	?
Hydroxycarbamide	NHY	C(=O)(N)NO	1	2GEH	1	Ribonucleoside-diphosphate reductase large subunit
Ibandronate	BFQ	CCCCC[N@](C)CCC(O)(P(=O)(O)O)P(=O)(O)O	1	2F94	1	Farnesyl pyrophosphate synthetase
Ibuprofen	IBP	CC(C)Cc1ccc(cc1)[C@H](C)C(=O)O	5	1EQG, 2BXG, 2PWS, 2WD9, 3IB2	3	Prostaglandin G/H synthase 1
Idoxuridine	ID2	C1[C@@H]([C@H](O[C@H]1N2C=C(C(=O)NC2=O)I)CO)O	1	1KI7	1	DNA polymerase
Imatinib	STI	Cc1ccc(cc1Nc2nccc(n2)c3cccnc3)NC(=O)c4ccc(cc4)CN5CCN(CC5)C	10	1IEP, 1OPJ, 1T46, 1XBB, 2HYY, 2OIQ, 2PL0, 3FW1, 3GVU, 3HEC	10	ATP-binding cassette sub-family G member 2
Imipenem	IM2	C[C@H]([C@@H](C=O)[C@H]1CC(=C(N1)C(=O)O)SCCNC=N)O	5	1BT5, 1H5X, 1JVJ, 1LL5, 3BFC	1	Beta-lactamase
Imipramine	IXX	CN(C)CCCN1c2ccccc2CCc3c1cccc3	1	2Q72	3	Sodium-dependent noradrenaline transporter
Indapamide	BL1	C[C@H]1Cc2ccccc2N1NC(=O)c3ccc(c(c3)S(=O)(=O)N)Cl	1	3BL1	2	Potassium voltage-gated channel subfamily KQT member 1
Indinavir	MK1	CC(C)(C)NC(=O)[C@@H]1C[N@@](CC[N@]1C[C@H](C[C@@H](Cc2ccccc2)C(=O)N[C@H]3c4ccccc4C[C@H]3O)O)Cc5cccnc5	14	1C6Y, 1HSG, 1HSH, 1K6C, 1SDT, 1SDU, 1SDV, 1SGU, 2AVO, 2AVS, 2AVV, 2B7Z, 2BPX, 2R5P	2	HIV-1 protease
Indomethacin	IMN	Cc1c(c2cc(ccc2n1C(=O)c3ccc(cc3)Cl)OC)CC(=O)O	12	1S2A, 1Z9H, 2BXK, 2BXM, 2BXQ, 2DM6, 2OTH, 2ZB8, 3FO7, 3H1X, 3IB1, 4COX	2	Prostaglandin G/H synthase 1
Isoflurane	ICF	[C@H](C(F)(F)F)(OC(F)F)Cl	2	1XZ3, 3F78	8	Calcium-transporting ATPase type 2C member 1
Kanamycin	KAN	C1[C@H]([C@@H]([C@H]([C@@H]([C@H]1N)O[C@@H]2[C@@H]([C@H]([C@@H]([C@H](O2)CN)O)O)O)O)O[C@@H]3[C@@H]([C@H]([C@@H]([C@H](O3)CO)O)N)O)N	4	1KNY, 1L8T, 1M4I, 1ND4	2	30S ribosomal protein S12
Ketoconazole	KTN, KLN	CC(=O)N1CCN(CC1)c2ccc(cc2)OC[C@H]3COC(O3)(Cn4ccnc4)c5ccc(cc5Cl)Cl, CC(=O)N1CCN(CC1)c2ccc(cc2)OC[C@@H]3CO[C@@](O3)(Cn4ccnc4)c5ccc(cc5Cl)Cl	5	1JIN, 1JIP, 2JJP, 2V0M, 3I3K	2	Cytochrome P450 51
Lamivudine	3TC	C1[C@H](O[C@H](S1)CO)N2C=CC(=NC2=O)N	1	2NOA	3	Gag-Pol polyprotein
Lapatinib	FMM	CS(=O)(=O)CCNCc1ccc(o1)c2ccc3c(c2)c(ncn3)Nc4ccc(c(c4)Cl)OCc5cccc(c5)F	2	1XKK, 3BBT	2	Epidermal growth factor receptor
Lasofoxifene	C3D	c1ccc(cc1)[C@H]2CCc3cc(ccc3[C@H]2c4ccc(cc4)OCCN5CCCC5)O	1	2OUZ	1	Estrogen receptor
Leucovorin	FON	c1cc(ccc1C(=O)N[C@@H](CCC(=O)O)C(=O)O)NC[C@@H]2CNC3=C(N2C=O)C(=O)N=C(N3)N	7	1KL2, 1QD1, 1VRQ, 1XZQ, 2BLN, 3GEE, 3GEH	1	Thymidylate synthase
Levocarnitine	152	C[N+](C)(C)C[C@@H](CC(=O)O)O	7	1NDF, 1S5O, 1T7O, 1T7Q, 1XL8, 2H3P, 2H3U	8	Mitochondrial carnitine/acylcarnitine carrier protein CACL
Levothyroxine	T44	c1c(cc(c(c1I)Oc2cc(c(c(c2)I)O)I)I)C[C@@H](C(=O)O)N	15	1ETA, 1ETB, 1F86, 1HK1, 1HK2, 1HK3, 1HK4, 1HK5, 1ICT, 1IE4, 1SN0, 1Y0X, 2CEO, 2RIW, 2ROX	8	Mu-crystallin homolog
Liothyronine	T3	c1cc(c(cc1Oc2c(cc(cc2I)C[C@@H](C(=O)O)N)I)I)O	8	1BSX, 1SN5, 1XZX, 2H77, 2H79, 2PIV, 2PIW, 3GWS	6	Thyroid hormone receptor beta-1
Lisinopril	LPR	c1ccc(cc1)CC[C@@H](C(=O)O)N[C@@H](CCCCN)C(=O)N2CCC[C@H]2C(=O)O	3	1J36, 1O86, 2C6N	3	Angiotensin-converting enzyme, testis-specific isoform
Lopinavir	AB1	Cc1cccc(c1OCC(=O)N[C@@H](Cc2ccccc2)[C@H](C[C@H](Cc3ccccc3)NC(=O)[C@H](C(C)C)N4CCCNC4=O)O)C	8	1MUI, 1RV7, 2O4S, 2Q5K, 2QHC, 2RKF, 2RKG, 2Z54	3	HIV-1 protease
Loracarbef	LOR	c1ccc(cc1)[C@H](C(=O)N[C@H]2[C@H]3CCC(=C(N3C2=O)C(=O)O)Cl)N	1	1FCN	1	Penicillin-binding proteins 1A/1B
Lovastatin Acid	LVA	CC[C@H](C)C(=O)O[C@H]1C[C@H](C=C2[C@H]1[C@H]([C@H](C=C2)C)CC[C@H](C[C@H](CC(=O)O)O)O)C	2	1T02, 3HLG	1	3-hydroxy-3-methylglutaryl-coenzyme A reductase
Mannitol	MTL	C([C@H]([C@H]([C@@H]([C@@H](CO)O)O)O)O)O	4	1M2W, 1ZZQ, 1ZZU, 2VFU	2	DNA
Melatonin	ML1	CC(=O)NCCc1c[nH]c2c1cc(cc2)OC	3	2QWX, 2QX4, 2QX6	6	Melatonin receptor type 1A
Mercaptopurine	PM6	c1[nH]c2c(n1)c(ncn2)S	1	3BGD	12	AMP deaminase 3
Meropenem	MER	C[C@H]1[C@H](C(=N[C@H]1[C@@H]([C@@H](C)O)C(=O)O)C(=O)O)S[C@H]2C[C@@H](NC2)C(=O)N(C)C	3	1H8Y, 2ZD8, 3BFG	2	Penicillin-binding protein 4
Mesna	COM	C(CS(=O)(=O)O)S	8	1E6V, 1E6Y, 1HBN, 1HBO, 1HBU, 1MRO, 2C3C, 2C3D	?
Methamphetamine	B40	C[C@@H](Cc1ccccc1)NC	1	3GKZ	2	Alpha-1A adrenergic receptor
Methazolamide	MZM	CC(=O)Nc1[n+](nc(s1)S(=O)(=O)N)C	3	1BZM, 3DAZ, 3DCS	1	Carbonic anhydrase 1
Methimazole	MMZ	CN1C=CNC1=S	1	2GVC	1	Thyroid peroxidase
Methotrexate	MTX, MT1	CN(Cc1cnc2c(n1)c(nc(n2)N)N)c3ccc(cc3)C(=O)N[C@@H](CCC(=O)O)C(=O)O, CN(Cc1cnc2c(n1)c(nc([nH+]2)N)N)c3ccc(cc3)C(=O)N[C@@H](CCC(=O)O)C(=O)O	37	1AO8, 1AXW, 1D1G, 1DDR, 1DDS, 1DF7, 1DHI, 1DHJ, 1DLS, 1DRA, 1DRB, 1DRE, 1E7W, 1MXF, 1P33, 1RA3, 1RB3, 1RG7, 1RH3, 1RX3, 1TDR, 1U70, 1U72, 2C7V, 2DRC, 2INQ, 2OIP, 2QK8, 3CD2, 3CL9, 3DAT, 3DAU, 3DFR, 3DRC, 3EIG, 3IA4, 4DFR	2	Dihydrofolate reductase
Methoxsalen	8MO	COc1c2c(cco2)cc3c1OC(=O)C=C3	1	1Z11	2	DNA
Metronidazole	2MN	Cc1ncc(n1CCO)[N+](=O)[O-]	1	1W3R	3	Periplasmic [Fe] hydrogenase 1
Metyrapone	MYT	CC(C)(c1cccnc1)C(=O)c2cccnc2	2	1PHG, 1W0G	2	Cytochrome P450-cam
Mexiletine	505	Cc1cccc(c1OC[C@@H](C)N)C	1	2VIN	1	Sodium channel protein type 5 subunit alpha
Mifepristone	486	CC#C[C@@]1(CC[C@@H]2[C@@]1(C[C@@H](C3=C4CCC(=O)C=C4CC[C@@H]23)c5ccc(cc5)N(C)C)C)O	2	1NHZ, 2W8Y	2	Progesterone receptor
Miglustat	NBV	CCCC[N@@]1C[C@@H]([C@H]([C@@H]([C@H]1CO)O)O)O	1	2V3D	1	Ceramide glucosyltransferase
Milrinone	MIL	CC1=C(C=C(C(=O)N1)C#N)c2ccncc2	1	1TLM	2	cGMP-inhibited 3',5'-cyclic phosphodiesterase A
Minocycline	MIY	CN(C)c1ccc(c2c1C[C@H]3C[C@H]4[C@@H](C(=C(C(=O)[C@]4(C(=C3C2=O)O)O)C(=O)N)O)N(C)C)O	1	2DRD	10	Cytochrome c
Minoxidil	MXD	c1c([n+](c(nc1N2CCCCC2)N)[O-])N	1	3B6H	3	ATP-sensitive inward rectifier potassium channel 1
Mitoxantrone	MIX	c1cc(c2c(c1NCCNCCO)C(=O)c3c(ccc(c3C2=O)O)O)NCCNCCO	1	2FUM	2	DNA topoisomerase 2-alpha
Montelukast	MTK	CC(C)(c1ccccc1CC[C@H](c2cccc(c2)/C=C/c3ccc4ccc(cc4n3)Cl)SCC5(CC5)CC(=O)O)O	1	2NNI	2	Cysteinyl leukotriene receptor 1
Morphine	MOI	C[N@]1CC[C@]23c4c5ccc(c4O[C@H]2[C@H](C=C[C@H]3[C@H]1C5)O)O	1	1Q0Y	3	Mu-type opioid receptor
Moxalactam	MXL	Cn1c(nnn1)SCC2=C(N3[C@@H]([C@@](C3=O)(NC(=O)[C@@H](c4ccc(cc4)O)C(=O)O)OC)OC2)C(=O)O	1	1K6R	1	Metallo-beta-lactamase L1
Mupirocin	MRC	CC([C@H]1[C@@H](O1)C[C@H]2CO[C@H]([C@H]([C@H]2O)O)C/C(=C/C(=O)OCCCCCCCCC(=O)O)/C)[C@H](C)O	4	1FFY, 1JZS, 1QU2, 1QU3	1	Isoleucyl-tRNA synthetase
Mycophenolic Acid	MOA	Cc1c2c(c(c(c1OC)C\C=C(/C)\CCC(=O)O)O)C(=O)OC2	4	1JR1, 1ME7, 1MEH, 1MEI	4	Inosine-5'-monophosphate dehydrogenase 2
Nafcillin	NFN	CCOc1ccc2ccccc2c1C(=O)N[C@H]3[C@@H]4N(C3=O)[C@H](C(S4)(C)C)C(=O)[O-]	1	1T9W	1	Penicillin-binding proteins 1A/1B
Naproxen	NPS	C[C@@H](c1ccc2cc(ccc2c1)OC)C(=O)O	1	2VDB	2	Prostaglandin G/H synthase 1
Nelfinavir	1UN	Cc1c(cccc1O)C(=O)N[C@@H](CSc2ccccc2)[C@@H](C[N@@]3C[C@H]4CCCC[C@H]4C[C@H]3C(=O)NC(C)(C)C)O	10	1OHR, 2PYM, 2PYN, 2Q63, 2Q64, 2QAK, 2R5Q, 3EKX, 3EL0, 3EL5	1	HIV-1 protease
Neomycin B	NMY	C1[C@H]([C@@H]([C@H]([C@@H]([C@H]1N)O[C@@H]2[C@@H]([C@H]([C@@H]([C@H](O2)CN)O)O)N)O[C@H]3[C@@H]([C@@H]([C@H](O3)CO)O[C@@H]4[C@@H]([C@H]([C@@H]([C@@H](O4)CN)O)O)N)O)O)N	1	2B0Q	2	30S ribosomal protein S12
Nevirapine	NVP	Cc1ccnc2c1NC(=O)c3cccnc3N2C4CC4	13	1FKP, 1JLB, 1JLF, 1LW0, 1LWC, 1LWE, 1LWF, 1S1U, 1S1X, 1VRT, 2HND, 2HNY, 3HVT	1	Gag-Pol polyprotein
Niacinamide	NCA	c1cc(cnc1)C(=O)N	22	1DMA, 1ISI, 1ISM, 1OJU, 1R15, 1YC2, 1YC5, 2A15, 2C8A, 2E5D, 2H4J, 2HJH, 2OD9, 2OTV, 2QHF, 2QQG, 2R6V, 2R9J, 2Z77, 2ZB7, 3DZG, 3I9J	2	3'-5' cyclic AMP phosphodiesterase
Nicotine	NCT	C[N@@]1CCC[C@H]1c2cccnc2	3	1P2Y, 1P7R, 1UW6	10	Cytochrome P450-cam
Nilotinib	NIL	Cc1ccc(cc1Nc2nccc(n2)c3cccnc3)C(=O)Nc4cc(cc(c4)n5cc(nc5)C)C(F)(F)F	2	3CS9, 3GP0	4	Bcr-Abl tyrosine kinase
Nitrofurazone	NFZ	c1cc(oc1\C=N\NC(=O)N)[N+](=O)[O-]	1	1YKI	4	Pyruvate dehydrogenase [cytochrome]
Norepinephrine	LT4	c1cc(c(cc1[C@H](CN)O)O)O	1	3HCD	11	Beta-2 adrenergic receptor
Norethindrone	NDR	C[C@]12CC[C@H]3[C@H]([C@@H]1CC[C@]2(C#C)O)CCC4=CC(=O)CC[C@H]34	2	1SQN, 2W8Y	2	Progesterone receptor
Norgestrel	NOG	CC[C@]12CC[C@H]3[C@H]([C@@H]1CC[C@]2(C#C)O)CCC4=CC(=O)CC[C@H]34	2	1LHV, 3D90	3	Progesterone receptor
Novobiocin	NOV	Cc1c(ccc2c1OC(=O)C(=C2O)NC(=O)c3ccc(c(c3)CC=C(C)C)O)O[C@H]4[C@@H]([C@@H]([C@H](C(O4)(C)C)OC)OC(=O)N)O	3	1AJ6, 1KIJ, 1S14	1	DNA gyrase subunit B
Oseltamivir Carboxylate	G39	CCC(CC)O[C@@H]1C=C(C[C@@H]([C@H]1NC(=O)C)N)C(=O)O	8	2HT7, 2HT8, 2HU0, 2HU4, 2QWH, 2QWK, 3CL0, 3CL2	2	Neuraminidase
Oxyphenbutazone	OPB	CCCC[C@H]1C(=O)N(N(C1=O)c2ccc(cc2)O)c3ccccc3	3	1Q7A, 2BXB, 2BXO	1	Phospholipase A2 VRV-PL-VIIIa
Paclitaxel	TA1	CC1=C2[C@H](C(=O)[C@@]3([C@H](C[C@@H]4[C@]([C@H]3[C@@H]([C@@](C2(C)C)(C[C@@H]1OC(=O)[C@@H]([C@H](c5ccccc5)NC(=O)c6ccccc6)O)O)OC(=O)c7ccccc7)(CO4)OC(=O)C)O)C)OC(=O)C	7	1JFF, 2HXF, 2HXH, 2P4N, 2WBE, 3DCO, 3EDL	2	Apoptosis regulator Bcl-2
Pamidronate	210	C(CN)C(O)(P(=O)(O)O)P(=O)(O)O	1	2F89	1	Farnesyl pyrophosphate synthetase
Paromomycin	PAR	C1[C@H]([C@@H]([C@H]([C@@H]([C@H]1N)O[C@@H]2[C@@H]([C@H]([C@@H]([C@H](O2)CO)O)O)N)O[C@H]3[C@@H]([C@@H]([C@H](O3)CO)O[C@@H]4[C@@H]([C@H]([C@@H]([C@@H](O4)CN)O)O)N)O)O)N	14	2J00, 2J02, 2UU9, 2UUA, 2UUB, 2UUC, 2UXB, 2UXC, 2UXD, 2VQE, 2VQF, 2VQY, 2WRN, 2WRQ	1	16S rRNA
Pemetrexed	LYA	c1cc(ccc1CCc2c[nH]c3c2C(=O)N=C(N3)N)C(=O)N[C@@H](CCC(=O)O)C(=O)O	3	1JU6, 1JUJ, 3K2H	4	Thymidylate synthase
Penciclovir	PE2	c1nc2c(n1CCC(CO)CO)N=C(NC2=O)N	1	1KI3	2	DNA polymerase
Penicillamine	LEI	CC(C)([C@H](C(=O)O)N)S	1	3H5G	2	Caspase-1
Penicillin G	PNN	CC1([C@@H](N2[C@H](S1)[C@@H](C2=O)NC(=O)Cc3ccccc3)C(=O)O)C	4	1FXV, 1GM7, 1UOB, 1UOF	1	Penicillin-binding proteins 1A/1B
Penicillin V	PNV	CC1([C@@H](N2[C@H](S1)[C@@H](C2=O)NC(=O)COc3ccccc3)C(=O)O)C	2	2EX9, 2Z71	1	Penicillin-binding proteins 1A/1B
Pentamidine	PNT	c1cc(ccc1C(=N)N)OCCCCCOc2ccc(cc2)C(=N)N	4	1RKW, 3CR4, 3CR5, 3HII	2	DNA
Pentostatin	DCF	c1nc2c(n1[C@H]3C[C@@H]([C@H](O3)CO)O)N=CNC[C@H]2O	2	1A4L, 2PGR	1	Adenosine deaminase
Pentoxifylline	PNX	CC(=O)CCCCN1C(=O)c2c(ncn2C)N(C1=O)C	1	2A3C	4	cAMP-specific 3',5'-cyclic phosphodiesterase 4B
Phenylacetate	PAC	c1ccc(cc1)CC(=O)O	5	1FXH, 1K5Q, 1PNL, 2INE, 2ISF	1	Mevalonate pyrophosphate (MVAPP) decarboxylase
Phenylbutazone	P1Z	CCCCC1C(=O)N(N(C1=O)c2ccccc2)c3ccccc3	4	2BXC, 2BXP, 2BXQ, 2W98	2	Prostaglandin G/H synthase 2
Phytonadione	PQN	CC1=C(C(=O)c2ccccc2C1=O)C\C=C(/C)\CCC[C@H](C)CCC[C@H](C)CCCC(C)C	4	1JB0, 2WSC, 2WSE, 2WSF	2	Vitamin K-dependent gamma-carboxylase
Podofilox	POD	COc1cc(cc(c1OC)OC)[C@@H]2c3cc4c(cc3[C@@H]([C@@H]5C2C(=O)OC5)O)OCO4	1	1SA1	1	DNA topoisomerase 2-alpha
Praziquantel	PZQ	c1ccc2c(c1)CCN3[C@H]2CN(CC3=O)C(=O)C4CCCCC4	1	1GTB	2	Glutathione S-transferase class-mu 26 kDa isozyme
Progesterone	STR	CC(=O)[C@H]1CC[C@@H]2[C@@]1(CC[C@H]3[C@H]2CCC4=CC(=O)CC[C@]34C)C	12	1A28, 1DBB, 1H60, 1MRQ, 1W0F, 1YA3, 2AA5, 2AA6, 2ABA, 2HZQ, 2O5Y, 3COT	3	Progesterone receptor
Propofol	PFL	CC(C)c1cccc(c1O)C(C)C	2	1E7A, 3F33	3	Gamma-aminobutyric-acid receptor subunit alpha-1
Propranolol	SNP	CC(C)NC[C@@H](COc1cccc2c1cccc2)O	1	1DY4	5	Beta-1 adrenergic receptor
Pyrazinoic Acid	VGL	c1cnc(cn1)C(=O)O	1	2WTA	2	Cyclopropane-fatty-acyl-phospholipid synthase 1
Pyrimethamine	CP6	CCc1c(c(nc(n1)N)N)c2ccc(cc2)Cl	3	1J3J, 2BL9, 2BLA	2	Bifunctional dihydrofolate reductase-thymidylate synthase
Quinupristin	SYB	CC[C@@H]1C(=O)N2CCC[C@H]2C(=O)N([C@H](C(=O)N3C[C@H](C(=O)C[C@H]3C(=O)N[C@H](C(=O)O[C@@H]([C@@H](C(=O)N1)NC(=O)c4c(cccn4)O)C)c5ccccc5)CS[C@H]6CN7CCC6CC7)Cc8ccc(cc8)N(C)C)C	1	2Z2P	1	50S ribosomal subunit
Raloxifene	RAL	c1cc(ccc1c2c(c3ccc(cc3s2)O)C(=O)c4ccc(cc4)OCCN5CCCCC5)O	4	1ERR, 1QKN, 2JFA, 2QXS	2	Estrogen receptor
Rasagiline	RAS, RSA	C#CCN[C@@H]1CCc2c1cccc2, C#CCN[C@H]1CCc2c1cccc2	6	1S2Q, 2BK4, 2C72, 2C73, 2C75, 2C76	2	Apoptosis regulator Bcl-2
Rifabutin	RBT	Cc1c(c2c3c4c1O[C@@](C4=O)(O\C=C\[C@@H]([C@H]([C@H]([C@@H]([C@@H]([C@@H]([C@H]([C@H](\C=C\C=C(/C(=O)NC(=C5C3=NC6(N5)CCN(CC6)CC(C)C)C2=O)\C)C)O)C)O)C)OC(=O)C)C)OC)C)O	1	2A68	3	DNA-directed RNA polymerase alpha chain
Rifampin	RFP	Cc1c(c2c3c4c1O[C@@](C4=O)(O\C=C\[C@@H]([C@H]([C@H]([C@@H]([C@@H]([C@@H]([C@H]([C@H](C=C\C=C(/C(=O)Nc(c2O)c(c3O)\C=N\N5CCN(CC5)C)\C)C)O)C)O)C)OC(=O)C)C)OC)C)O	4	1I6V, 1SKX, 1YNN, 2HW2	4	DNA-directed RNA polymerase beta chain
Rifapentine	RPT	Cc1c(c2c3c4c1O[C@@](C4=O)(O\C=C\[C@@H]([C@H]([C@H]([C@@H]([C@@H]([C@@H]([C@H]([C@H](\C=C\C=C(/C(=O)Nc(c2O)c(c3O)\C=N\N5CCN(CC5)C6CCCC6)\C)C)O)C)O)C)OC(=O)C)C)OC)C)O	1	2A69	1	DNA-directed RNA polymerase beta' chain
Rimantadine	RIM	C[C@H](C12CC3CC(C1)CC(C3)C2)N	1	2RLF	1	Matrix protein 2
Risedronate	RIS	c1cc(cnc1)CC(O)(P(=O)(O)O)P(=O)(O)O	6	1RQJ, 1YHL, 1YQ7, 1YV5, 2O1O, 2QIS	1	Farnesyl pyrophosphate synthetase
Ritonavir	RIT	CC(C)c1nc(cs1)CN(C)C(=O)N[C@@H](C(C)C)C(=O)N[C@@H](Cc2ccccc2)C[C@@H]([C@H](Cc3ccccc3)NC(=O)OCc4cncs4)O	5	1HXW, 1N49, 1RL8, 1SH9, 2B60	1	HIV-1 protease
Rivaroxaban	RIV	c1cc(ccc1N2CCOCC2=O)N3C[C@@H](OC3=O)CNC(=O)c4ccc(s4)Cl	1	2W26	1	Coagulation factor Xa
Rosiglitazone	BRL	CN(CCOc1ccc(cc1)C[C@H]2C(=O)NC(=O)S2)c3ccccn3	5	1FM6, 1ZGY, 2PRG, 3CS8, 3DZY	1	Peroxisome proliferator-activated receptor gamma
Rosuvastatin	FBI	CC(C)c1c(c(nc(n1)N(C)S(=O)(=O)C)c2ccc(cc2)F)CC[C@H](C[C@H](CC(=O)O)O)O	1	1HWL	3	3-hydroxy-3-methylglutaryl-coenzyme A reductase
Saquinavir	ROC	CC(C)(C)NC(=O)[C@@H]1C[C@@H]2CCCC[C@@H]2C[N@]1C[C@H]([C@H](Cc3ccccc3)NC(=O)[C@H](CC(=O)N)NC(=O)c4ccc5ccccc5n4)O	12	1C6Z, 1FB7, 2NMW, 2NMY, 2NMZ, 2NNK, 2NNP, 3CYX, 3D1X, 3D1Y, 3EKQ, 3EL4	7	HIV-1 protease
Saxagliptin	BJM	C1[C@@H]2C[C@@H]2N([C@@H]1C#N)C(=O)[C@H](C34C[C@H]5C[C@@H](C3)CC(C5)(C4)O)N	1	3BJM	1	Dipeptidyl peptidase 4
Sertraline	SRE	CN[C@H]1CC[C@H](c2c1cccc2)c3ccc(c(c3)Cl)Cl	1	3GWU	3	Sodium-dependent serotonin transporter
Sildenafil	VIA	CCCc1c2c(n(n1)C)C(=O)NC(=N2)c3cc(ccc3OCC)S(=O)(=O)N4CCN(CC4)C	5	1TBF, 1UDT, 1XOS, 2H42, 3JWQ	2	cGMP-specific 3',5'-cyclic phosphodiesterase
Simvastatin Acid	SIM	CCC(C)(C)C(=O)O[C@H]1C[C@H](C=C2[C@H]1[C@H]([C@H](C=C2)C)CC[C@H](C[C@H](CC(=O)O)O)O)C	2	1HW9, 3HLF	25	Interleukin-6
Sirolimus	RAP	C[C@@H]1CC[C@H]2C[C@@H](C(=CC=C\C=C\[C@H](C[C@H](C(=O)[C@@H]([C@@H](/C(=C/[C@H](C(=O)C[C@H](OC(=O)[C@@H]3CCCCN3C(=O)C(=O)[C@@]1(O2)O)[C@H](C)C[C@@H]4CC[C@H]([C@@H](C4)OC)O)C)/C)O)OC)C)C)C)OC	9	1C9H, 1FAP, 1FKB, 1FKL, 1PBK, 2DG3, 2DG4, 2DG9, 2VCD	1	FK506-binding protein 1A
Sitagliptin	715	c1c(c(cc(c1F)F)F)C[C@H](CC(=O)N2CCn3c(nnc3C(F)(F)F)C2)N	1	1X70	1	Dipeptidyl peptidase 4
Sorafenib	BAX	CNC(=O)c1cc(ccn1)Oc2ccc(cc2)NC(=O)Nc3ccc(c(c3)C(F)(F)F)Cl	4	1UWH, 1UWJ, 3GCS, 3HEG	7	B-Raf proto-oncogene serine/threonine-protein kinase
Spironolactone	SNL	CC(=O)S[C@@H]1CC2=CC(=O)CC[C@@]2([C@@H]3[C@@H]1[C@@H]4CC[C@]5([C@]4(CC3)C)CCC(=O)O5)C	2	2AB2, 2OAX	2	Type-1 angiotensin II receptor
Streptomycin	SRY	[H]/N=C(/N)\N[C@@H]1[C@H]([C@@H]([C@H]([C@@H]([C@H]1O)O)O[C@H]2[C@@H]([C@]([C@@H](O2)C)(C=O)O)O[C@H]3[C@H]([C@@H]([C@H]([C@@H](O3)CO)O)O)NC)N/C(=N\[H])/N)O	1	3HAV	2	30S ribosomal protein S12
Streptozocin	STZ	CN(C(=O)N[C@@H]1[C@H]([C@@H]([C@H](O[C@H]1O)CO)O)O)N=O	1	2W4X	1	DNA
Succinylcholine	SCK	C[N+](C)(C)CCOC(=O)CCC(=O)OCC[N+](C)(C)C	2	2HA2, 2HA6	1	Muscarinic acetylcholine receptor M1
Sulfanilamide	SAN	c1cc(ccc1N)S(=O)(=O)N	1	1AJ0	1	Para-aminobenzoate synthase
Sunitinib	B49	CCN(CC)CCNC(=O)c1c(c([nH]c1C)\C=C/2\c3cc(ccc3NC2=O)F)C	2	3G0E, 3G0F	9	Beta platelet-derived growth factor receptor
Tacrine	THA	c1ccc2c(c1)c(c3c(n2)CCCC3)N	4	1ACJ, 1MX1, 2AOW, 2AOX	1	Acetylcholinesterase
Tacrolimus	FK5	C[C@@H]1C[C@@H]([C@@H]2[C@H](C[C@H]([C@@](O2)(C(=O)C(=O)N3CCCC[C@H]3C(=O)O[C@@H]([C@@H]([C@H](CC(=O)[C@@H](\C=C(\C1)/C)CC=C)O)C)/C(=C/[C@@H]4CC[C@H]([C@@H](C4)OC)O)/C)O)C)OC)OC	8	1BKF, 1FKF, 1FKJ, 1Q6I, 1TCO, 1YAT, 2FKE, 2VN1	2	FK506-binding protein 1A
Tadalafil	CIA	CN1CC(=O)N2[C@@H](C1=O)Cc3c4ccccc4[nH]c3[C@H]2c5ccc6c(c5)OCO6	2	1UDU, 1XOZ	2	cAMP-specific 3',5'-cyclic phosphodiesterase 4A
Tazobactam	TAZ	C[C@@]1([C@@H](N2[C@@H](S1(=O)=O)CC2=O)C(=O)O)Cn3ccnn3	1	1VM1	1	Beta-lactamase SHV-1 precursor
Telbivudine	LLT	CC1=CN(C(=O)NC1=O)[C@@H]2C[C@H]([C@@H](O2)CO)O	1	3HP1	1	P protein [Includes: DNA-directed DNA polymerase
Testosterone	TES	C[C@]12CC[C@H]3[C@H]([C@@H]1CC[C@@H]2O)CCC4=CC(=O)CC[C@]34C	12	1AFS, 1I9J, 1J96, 1JTV, 1Q13, 1VPO, 2AM9, 2Q7I, 2Q7J, 2Q7K, 2Q7L, 3BUR	4	Androgen receptor
Tetracycline	TAC	C[C@]1(c2cccc(c2C(=O)C3=C([C@]4([C@@H](C[C@@H]31)C(C(=C(C4=O)C(=O)N)O)N(C)C)O)O)O)O	6	1I97, 2HCJ, 2HDN, 2TRT, 2UXO, 2VKE	4	30S ribosomal protein S4
Theophylline	TEP	CN1c2c([nH]cn2)C(=O)N(C1=O)C	1	2A3A	7	cGMP-inhibited 3',5'-cyclic phosphodiesterase A
Thiabendazole	TMG	c1ccc2c(c1)[nH]c(n2)c3cscn3	1	1YVM	1	Fumarate reductase flavoprotein subunit
Thioguanine	DX4	c1[nH]c2c(n1)C(=S)NC(=N2)N	1	3BMG	4	Hypoxanthine-guanine phosphoribosyltransferase
Timolol	TIM	CC(C)(C)NC[C@@H](COc1c(nsn1)N2CCOCC2)O	1	3D4S	2	Beta-1 adrenergic receptor
Tirofiban	AGG	CCCCS(=O)(=O)N[C@@H](Cc1ccc(cc1)OCCCCC2CCNCC2)C(=O)O	1	2VDM	5	Integrin alpha-IIb
Tobramycin	TOY	C1[C@@H]([C@H]([C@@H]([C@H]([C@@H]1N)O[C@@H]2[C@@H]([C@H]([C@@H]([C@H](O2)CO)O)N)O)O)O[C@@H]3[C@@H](C[C@@H]([C@H](O3)CN)O)N)N	1	1M4D	2	30S ribosomal protein S12
Topiramate	TOR	CC1(O[C@@H]2CO[C@@]3([C@H]([C@@H]2O1)OC(O3)(C)C)COS(=O)(=O)N)C	1	3HKU	5	Gamma-aminobutyric-acid receptor subunit alpha-1
Tranexamic Acid	AMH	C1CC(CCC1CN)C(=O)O	2	1B2I, 1CEB	2	Plasminogen
Tranylcypromine	TPA	c1ccc(cc1)[C@H]2C[C@@H]2[NH3+]	1	1TNL	4	5-hydroxytryptamine 2A receptor
Triamterene	DX2	c1ccc(cc1)c2c(nc3c(n2)c(nc(n3)N)N)N	1	3BME	4	Amiloride-sensitive sodium channel subunit gamma
Trichlormethiazide	TRU, B7D	c1c2c(cc(c1Cl)S(=O)(=O)N)S(=O)(=O)N[C@@H](N2)C(Cl)Cl, c1c2c(cc(c1Cl)S(=O)(=O)N)S(=O)(=O)N[C@@H](N2)C(Cl)Cl	2	1ZGF, 3ILT	6	Solute carrier family 12 member 1
Triclosan	TCL	c1cc(c(cc1Cl)O)Oc2ccc(cc2Cl)Cl	14	1C14, 1D7O, 1D8A, 1NHG, 1P45, 1QG6, 1QSG, 1UH5, 2B35, 2O2S, 2O2Y, 2PD3, 2QIO, 3GR6	1	Enoyl acyl carrier protein reductase
Trifluoperazine	TFP	CN1CCN(CC1)CCCN2c3ccccc3Sc4c2cc(cc4)C(F)(F)F	5	1A29, 1CTR, 1LIN, 1WRK, 1WRL	4	D(2) dopamine receptor
Trimethoprim	TOP, TRR	COc1cc(cc(c1OC)OC)Cc2cnc(nc2N)N, COc1cc(cc(c1OC)OC)Cc2c[nH+]c(nc2N)N	12	1DG5, 1DYR, 1LUD, 1YHO, 2BFM, 2HM9, 2W3A, 2W3V, 2W9G, 2W9H, 2W9S, 3FL9	3	Bifunctional dihydrofolate reductase-thymidylate synthase
Trimetrexate	TMQ	Cc1c(ccc2c1c(nc([nH+]2)N)N)CNc3cc(c(c(c3)OC)OC)OC	3	1BZF, 3CLB, 3HBB	1	Dihydrofolate reductase
Troglitazone	TDZ	Cc1c(c2c(c(c1O)C)CC[C@](O2)(C)COc3ccc(cc3)C[C@@H]4C(=O)NC(=O)S4)C	2	2QM9, 2VN0	4	Peroxisome proliferator-activated receptor gamma
Ursodiol	IU5	C[C@H](CCC(=O)O)[C@H]1CC[C@@H]2[C@@]1(CC[C@H]3[C@H]2[C@H](C[C@H]4[C@@]3(CC[C@@H](C4)O)C)O)C	2	1IHI, 1OT7	1	Aldo-keto reductase family 1 member C2
Valdecoxib	COX	Cc1c(c(no1)c2ccccc2)c3ccc(cc3)S(=O)(=O)N	1	2AW1	1	Prostaglandin G/H synthase 2
Valproic Acid	2PP	CCCC(CCC)C(=O)O	1	1DIT	3	4-aminobutyrate aminotransferase, mitochondrial
Vancomycin	VAN	C[C@H]1[C@H]([C@@](C[C@@H](O1)O[C@@H]2[C@H]([C@@H]([C@H](O[C@H]2Oc3c4cc5cc3Oc6ccc(cc6Cl)[C@H]([C@H](C(=O)N[C@H](C(=O)N[C@H]5C(=O)N[C@@H]7c8ccc(c(c8)-c9c(cc(cc9O)O)[C@H](NC(=O)[C@H]([C@@H](c1ccc(c(c1)Cl)O4)O)NC7=O)C(=O)O)O)CC(=O)N)NC(=O)[C@@H](CC(C)C)[NH2+]C)O)CO)O)O)(C)[NH3+])O	1	1PNV	2	DNA
Vardenafil	VDN	CCCc1nc(c2n1NC(=NC2=O)c3cc(ccc3OCC)S(=O)(=O)N4CCN(CC4)CC)C	4	1UHO, 1XOT, 1XP0, 3B2R	1	cGMP-specific 3',5'-cyclic phosphodiesterase
Vinblastine	VLB	CC[C@@]1(C[C@H]2C[C@@](c3c(c4ccccc4[nH]3)CC[N@](C2)C1)(c5cc6c(cc5OC)[N@@]([C@@H]7[C@]68CC[N@]9[C@H]8[C@@](C=CC9)([C@H]([C@@]7(C(=O)OC)O)OC(=O)C)CC)C)C(=O)OC)O	1	1Z2B	3	Tubulin beta chain
Vorinostat	SHH	c1ccc(cc1)NC(=O)CCCCCCC(=O)NO	4	1C3S, 1T69, 1ZZ1, 3C0Z	6	Histone deacetylase 1
Warfarin	SWF, RWF	CC(=O)C[C@@H](c1ccccc1)C2=C(c3ccccc3OC2=O)O, CC(=O)C[C@H](c1ccccc1)C2=C(c3ccccc3OC2=O)O	2	1OG5, 2BXD	3	Vitamin K epoxide reductase complex subunit 1
Zanamivir	ZMR	CC(=O)N[C@@H]1[C@H](C=C(O[C@H]1[C@@H]([C@@H](CO)O)O)C(=O)O)N=C(N)N	8	1A4G, 1NNC, 1V3E, 2CML, 2F0Z, 2HTQ, 3B7E, 3CKZ	2	Neuraminidase
Zidovudine Triphosphate	AZT	CC1=CN(C(=O)NC1=O)[C@H]2C[C@@H]([C@H](O2)CO[P@](=O)(O)O[P@](=O)(O)OP(=O)(O)O)N=[N+]=[N-]	1	8ICO	1	Gag-Pol polyprotein
Zoledronic Acid	ZOL	c1cn(cn1)CC(O)(P(=O)(O)O)P(=O)(O)O	7	1ZW5, 2E91, 2F8C, 2F8Z, 2F9K, 2Q58, 3EZ3	1	Farnesyl pyrophosphate synthetase
