# Supplementary material for: The Mycobacterium tuberculosis Drugome and Its Polypharmacological Implications
Source: PLoS Comput Biol. 2010 Nov 4;6(11):e1000976. doi: 10.1371/journal.pcbi.1000976 (PMC2973814; doi:10.1371/journal.pcbi.1000976)
Supplement: Table S2 — Cross-fold drug-target pairs in the TB-drugome (for solved M.tb structures only). This file contains a list of the cross-fold drug-target pairs with a SMAP P-value <1.0e-5, for solved M.tb structures only. For each pair, information about the drug and target structures is given, as well as the corresponding SMAP P-value (indicating the significance of the binding site similarity) and eHiTS energy score (from docking the drug into the predicted binding site in the M.tb protein). (0.08 MB XLS) [file pcbi.1000976.s007.xls]

## Sheet: Sheet1
M.tb PDB code	M.tb PDB chain(s)	M.tb protein	Drug LIG code	Drug target PDB code	Drug target protein	Drug target code	SMAP P-value	ehits energy score
2VBW	A,B	lrpA	T3	1SN5	transthyretin	Q9PTT3	6.078e-11	-6.36603
2VBX	A,B	lrpA	T3	1SN5	transthyretin	Q9PTT3	2.36e-10	-3.94451
2QZ8	A,B,C,D	lrpA	T3	1SN5	transthyretin	Q9PTT3	7.965e-10	-6.04146
2VBY	A,B	lrpA	T3	1SN5	transthyretin	Q9PTT3	2.027e-09	-8.31826
1Y10	A,B	Rv1264	OHT	2JF9	estrogen receptor	P03372	7.511e-09	-10.8782
1Y10	A,B	Rv1264	OHT	2FSZ	estrogen receptor beta	Q92731	7.929e-09	-10.8782
2NSD	A	inhA	REA	3DZY	retinoic acid receptor rxr-alpha	P19793	9.507e-09	-7.80617
2VBZ	A,B	lrpA	T3	1SN5	transthyretin	Q9PTT3	2.311e-08	-5.46973
1K0R	A	nusA	T44	1HK3	serum albumin	P02768	2.586e-08	-9.05195
2JAN	A,D	tyrS	MRC	1JZS	isoleucyl-trna synthetase	P56690	3.019e-08	-10.9005
1Y10	A,B	Rv1264	OHT	2BJ4	estrogen receptor	P03372	3.658e-08	-10.8782
1BVR	C,D,E,F	inhA	CIA	1UDU	cgmp-specific 3',5'-cyclic phosphodiesterase	O76074	4.355e-08	-6.82288
2BYO	A	lppX	VDN	3B2R	cgmp-specific 3',5'-cyclic phosphodiesterase	O76074	4.392e-08	-9.36533
1K0R	A	nusA	T44	1HK2	serum albumin	P02768	4.407e-08	-9.05195
3I54	A,B	Rv3676	OHT	2JF9	estrogen receptor	P03372	4.74e-08	-8.4028
1Y10	A,B	Rv1264	STR	2AA6	mineralocorticoid receptor	P08235	5.807e-08	x
1K0R	A	nusA	T44	1HK1	serum albumin	P02768	6.309e-08	-9.05195
3FHZ	A,B,C,D,E,F	argR	T44	1HK2	serum albumin	P02768	6.397e-08	-4.99233
3FNE	A,B,C,D	inhA	EST	1A52	estrogen receptor	P03372	7.132e-08	-11.104
3I59	A,B	Rv3676	LYA	3K2H	dihydrofolate reductase/thymidylate synthase	A7ASX7	9.268e-08	-8.36597
1Y10	A,B	Rv1264	1CA	2ABI	mineralocorticoid receptor	P08235	1.084e-07	x
3I59	A,B	Rv3676	TDZ	2VN0	cytochrome p450 2c8	P10632	1.204e-07	-10.852
2NSD	A	inhA	REA	1XLS	retinoic acid receptor rxr-alpha	P19793	1.371e-07	-7.80789
3I54	A,B	Rv3676	EST	1A52	estrogen receptor	P03372	1.517e-07	-10.4431
1XDI	A,B	lpdA	017	3EBZ	protease	P04584	1.566e-07	-4.30673
3FNE	A,B,C,D	inhA	DES	3ERD	protein (estrogen receptor alpha)	P03372	1.599e-07	-6.49069
2O8X	A,B,C	sigC	BEP	1DTL	cardiac troponin c	P09860	1.965e-07	-3.18165
3D0S	A,B	Rv3676	LYA	3K2H	dihydrofolate reductase/thymidylate synthase	A7ASX7	2.141e-07	-6.70333
2VC0	A,B	lrpA	T3	1SN5	transthyretin	Q9PTT3	2.168e-07	-8.5213
2NSD	A	inhA	REA	1FM6	retinoic acid receptor rxr-alpha	P19793	2.2e-07	-7.80516
3FNE	A,B,C,D	inhA	OHT	2JF9	estrogen receptor	P03372	2.202e-07	-8.40607
1Y10	A,B	Rv1264	REA	3DZU	retinoic acid receptor rxr-alpha	P19793	2.304e-07	-10.3828
3I54	A,B	Rv3676	LYA	3K2H	dihydrofolate reductase/thymidylate synthase	A7ASX7	2.576e-07	-6.86596
3I59	A,B	Rv3676	RAL	2QXS	estrogen receptor	P03372	2.644e-07	-10.8984
2GP6	A,B	kasB	T44	1HK3	serum albumin	P02768	2.689e-07	-8.90977
2GP6	A,B	kasB	T44	1HK1	serum albumin	P02768	2.723e-07	-8.90977
2O8X	A,B,C	sigC	PL3	2UUU	alkyldihydroxyacetonephosphate synthase	O96759	3.182e-07	x
3FNF	A,B,C,D	inhA	OHT	2BJ4	estrogen receptor	P03372	3.291e-07	-8.3357
2FUM	A	pknB	OHT	2FSZ	estrogen receptor beta	Q92731	3.359e-07	-8.46401
1XDI	A,B	lpdA	017	2IDW	protease	P03368	3.362e-07	-4.30668
2BYO	A	lppX	OHT	2FSZ	estrogen receptor beta	Q92731	3.681e-07	-8.49776
2FUM	A	pknB	OHT	2JF9	estrogen receptor	P03372	3.723e-07	-8.46387
3I59	A,B	Rv3676	LEI	3H5G	unknown	P03372	4.615e-07	-5.08866
3FNG	A	inhA	RFP	2HW2	rifampin adp-ribosyl transferase	O67972	4.708e-07	x
1NKT	A,B	secA1	CIA	1UDU	cgmp-specific 3',5'-cyclic phosphodiesterase	O76074	5.435e-07	-6.52769
3D0S	A,B	Rv3676	DZP	2BXF	serum albumin	P02768	5.735e-07	-5.11924
2H34	A	pknE	REA	3DZY	retinoic acid receptor rxr-alpha	P19793	5.768e-07	-6.50311
2NSD	A	inhA	REA	3DZU	retinoic acid receptor rxr-alpha	P19793	6.233e-07	-7.80542
2H7M	A	inhA	CIA	1UDU	cgmp-specific 3',5'-cyclic phosphodiesterase	O76074	6.323e-07	-6.80673
2NSD	A	inhA	9RA	3H0A	retinoic acid receptor rxr-alpha	P19793	6.394e-07	-7.79819
1XDI	A,B	lpdA	VDN	3B2R	cgmp-specific 3',5'-cyclic phosphodiesterase	O76074	6.535e-07	-6.70254
2DFT	A,B,C,D	aroK	RIT	2B60	gag-pol polyprotein	Q7SMT3	6.586e-07	-8.90997
1Y10	A,B	Rv1264	T44	1HK1	serum albumin	P02768	6.732e-07	x
2Z9I	A,B,C,D,E,F,G,H,I	pepD	9RA	3H0A	retinoic acid receptor rxr-alpha	P19793	6.845e-07	-8.23017
1Y10	A,B	Rv1264	9RA	3H0A	retinoic acid receptor rxr-alpha	P19793	7.234e-07	x
2FUM	A	pknB	EST	1QKT	estradiol receptor	P03372	7.392e-07	-11.853
3D0S	A,B	Rv3676	T44	1HK3	serum albumin	P02768	7.697e-07	-7.61238
2NSD	A	inhA	REA	1FBY	retinoic acid receptor rxr-alpha	P19793	8.277e-07	-7.80507
1OZP	A	mshD	TAC	2TRT	tetracycline repressor class d	P0ACT4	8.292e-07	-7.09422
1Y10	A,B	Rv1264	SNL	2OAX	mineralocorticoid receptor	P08235	8.374e-07	x
3FNE	A,B,C,D	inhA	IBP	2BXG	serum albumin	P02768	8.505e-07	-5.30273
3D0S	A,B	Rv3676	NTO	2GD4	antithrombin-iii	P01008	8.866e-07	x
3I54	A,B	Rv3676	RAL	2QXS	estrogen receptor	P03372	8.905e-07	-10.8374
1P45	A,B	inhA	EST	1QKT	estradiol receptor	P03372	9.014e-07	-10.8197
3FNE	A,B,C,D	inhA	RFP	2HW2	rifampin adp-ribosyl transferase	O67972	9.033e-07	x
2VBX	A,B	lrpA	T44	1SN0	transthyretin	Q9PTT3	9.057e-07	-5.79984
1Y10	A,B	Rv1264	BRL	3DZY	peroxisome proliferator-activated receptor gamma	P37231	9.9e-07	-8.8944
1NKT	A,B	secA1	RAL	2QXS	estrogen receptor	P03372	1.015e-06	-8.31259
3I54	A,B	Rv3676	RAL	2JFA	corepressor peptide,estrogen receptor	P03372	1.025e-06	-10.8304
1NL3	A,B	secA1	CIA	1UDU	cgmp-specific 3',5'-cyclic phosphodiesterase	O76074	1.033e-06	x
2H7N	A	inhA	PFL	1E7A	serum albumin	P02768	1.042e-06	-10.3175
3I59	A,B	Rv3676	OHT	2BJ4	estrogen receptor	P03372	1.056e-06	-10.9055
3FNE	A,B,C,D	inhA	EST	1QKT	estradiol receptor	P03372	1.057e-06	-11.104
2BYO	A	lppX	TAC	2UXO	hth-type transcriptional regulator ttgr	Q9AIU0	1.064e-06	-4.67851
3I59	A,B	Rv3676	C3D	2OUZ	estrogen receptor	P03372	1.075e-06	-10.4948
2NSD	A	inhA	PFL	1E7A	serum albumin	P02768	1.076e-06	-6.02675
1Y10	A,B	Rv1264	RAL	1QKN	estrogen receptor beta	Q62986	1.091e-06	-4.86167
1E9X	A	cyp51	MT1	2INQ	dihydrofolate reductase	P0ABQ4	1.133e-06	-6.9142
1Y10	A,B	Rv1264	DES	3ERD	protein (estrogen receptor alpha)	P03372	1.165e-06	-10.2491
1XDI	A,B	lpdA	017	3EM6	protease	P03369	1.175e-06	-4.30668
3I54	A,B	Rv3676	NDR	1SQN	progesterone receptor	P06401	1.208e-06	-8.71677
3I54	A,B	Rv3676	OHT	2BJ4	estrogen receptor	P03372	1.221e-06	-8.40005
3FHZ	A,B,C,D,E,F	argR	NDR	2W8Y	progesterone receptor	P06401	1.269e-06	-7.71557
1P45	A,B	inhA	EST	1A52	estrogen receptor	P03372	1.277e-06	-10.8197
1Y10	A,B	Rv1264	ZK5	1GS4	androgen receptor	P10275	1.281e-06	x
3DKI	A,B	cysM	OHT	2JF9	estrogen receptor	P03372	1.29e-06	-6.24584
2VF2	A,B	bphD	EST	1FDU	17-beta-hydroxysteroid dehydrogenase	P14061	1.303e-06	-9.11483
3I54	A,B	Rv3676	EST	2OCF	estrogen receptor	P03372	1.307e-06	-10.4431
1SJ2	A,B	katG	OHT	1S9Q	estrogen-related receptor gamma	P62509	1.313e-06	-8.09302
2IJ5	A	cyp121	TAC	2VKE	tetracycline repressor protein class d	P0ACT4	1.354e-06	-6.76545
1Y10	A,B	Rv1264	EST	1PCG	estrogen receptor	P03372	1.389e-06	x
1Y10	A,B	Rv1264	EST	1FDW	17-beta-hydroxysteroid dehydrogenase	P14061	1.399e-06	x
1XDI	A,B	lpdA	AB1	1MUI	protease	Q903J0	1.42e-06	-6.67927
3IVG	A,B	panC	478	1HPV	hiv-1 protease	P04587	1.439e-06	-6.48886
2FUM	A	pknB	OHT	2BJ4	estrogen receptor	P03372	1.457e-06	-8.46379
2VBY	A,B	lrpA	T44	1SN0	transthyretin	Q9PTT3	1.511e-06	-8.86167
3FNF	A,B,C,D	inhA	DEX	1P93	glucocorticoid receptor	P04150	1.527e-06	-8.03297
3D0S	A,B	Rv3676	T44	1HK1	serum albumin	P02768	1.539e-06	-7.61223
2DFT	A,B,C,D	aroK	NOV	1KIJ	dna gyrase subunit b	Q9LCX5	1.545e-06	-8.90963
2FUM	A	pknB	RAL	1ERR	estrogen receptor	P03372	1.572e-06	-8.27944
2GQ2	A,B,C,D	thyX	T44	1HK3	serum albumin	P02768	1.648e-06	-5.60827
1NGK	A,B,C,D,E,F,G,H,I,J,K,L	glbO	T44	1HK1	serum albumin	P02768	1.654e-06	-6.35584
2NSD	A	inhA	REA	1XIU	unknown	P04585	1.7e-06	-7.80499
3I54	A,B	Rv3676	NOG	3D90	progesterone receptor	P06401	1.712e-06	-6.51173
1U9N	A	ethR	T44	1HK3	serum albumin	P02768	1.713e-06	-10.784
2VBW	A,B	lrpA	T44	1SN0	transthyretin	Q9PTT3	1.72e-06	-7.68449
1NKT	A,B	secA1	RAL	1ERR	estrogen receptor	P03372	1.72e-06	-8.31266
3FNE	A,B,C,D	inhA	1FL	2BXE	serum albumin	P02768	1.741e-06	-8.99806
2H34	A	pknE	REA	3DZU	retinoic acid receptor rxr-alpha	P19793	1.81e-06	-6.50311
1SJP	A,B	groEL	TES	2Q7L	androgen receptor	P10275	1.833e-06	-6.48372
1Y11	A	Rv1264	C3D	2OUZ	estrogen receptor	P03372	1.88e-06	-5.90451
1Y10	A,B	Rv1264	STR	2AA5	mineralocorticoid receptor	P08235	1.943e-06	x
3D0S	A,B	Rv3676	RFP	2HW2	rifampin adp-ribosyl transferase	O67972	1.959e-06	x
1XDI	A,B	lpdA	MK1	1SDV	protease retropepsin	P03367	1.977e-06	-8.5334
1Y10	A,B	Rv1264	OHT	3ERT	protein (estrogen receptor alpha)	P03372	2.005e-06	-10.8782
1NKT	A,B	secA1	T44	1HK2	serum albumin	P02768	2.019e-06	-5.51585
1K0R	A	nusA	NOG	3D90	progesterone receptor	P06401	2.022e-06	-8.72142
1NKT	A,B	secA1	DM1	3F8F	transcriptional regulator, padr-like family	A2RI36	2.066e-06	-7.343
2O8X	A,B,C	sigC	RAL	2QXS	estrogen receptor	P03372	2.086e-06	-10.6243
2FUM	A	pknB	EST	1PCG	estrogen receptor	P03372	2.093e-06	-11.853
2C27	A	mshD	TAC	2VKE	tetracycline repressor protein class d	P0ACT4	2.131e-06	-7.38587
3I59	A,B	Rv3676	SNL	2OAX	mineralocorticoid receptor	P08235	2.19e-06	-4.7112
2AP9	A,B,C,D,E,F	argB	MTX	2QK8	dihydrofolate reductase	Q81R22	2.196e-06	-4.74196
1Y11	A	Rv1264	RAL	2JFA	corepressor peptide,estrogen receptor	P03372	2.201e-06	-9.11941
3FNE	A,B,C,D	inhA	RAL	2QXS	estrogen receptor	P03372	2.212e-06	-8.03172
3I59	A,B	Rv3676	OHT	3ERT	protein (estrogen receptor alpha)	P03372	2.214e-06	-10.9055
2FHG	A,H,B,C,D,E,F,G,I,J,K,L,M,N,O,P,Q,R,S,T,U,V,W,X,Y,Z,1,2	prcA, prcB	TCL	1P45	enoyl-[acyl-carrier-protein] reductase [nadh]	P0A5Y6	2.226e-06	-5.89249
2FUM	A	pknB	EST	1GWR	oestrogen receptor	P03372	2.271e-06	-11.853
3I59	A,B	Rv3676	OHT	2JF9	estrogen receptor	P03372	2.302e-06	-10.9055
2W0B	A	cyp51	MT1	2INQ	dihydrofolate reductase	P0ABQ4	2.347e-06	-8.30949
1BVR	C,D,E,F	inhA	VDN	1UHO	cgmp-specific 3',5'-cyclic phosphodiesterase	O76074	2.354e-06	-10.6796
3FNE	A,B,C,D	inhA	BEP	1DTL	cardiac troponin c	P09860	2.487e-06	-6.42942
3FNF	A,B,C,D	inhA	VDN	3B2R	cgmp-specific 3',5'-cyclic phosphodiesterase	O76074	2.497e-06	-6.93524
2OAR	A,B,C,D,E	mscL	EST	1FDU	17-beta-hydroxysteroid dehydrogenase	P14061	2.507e-06	-7.23891
3ICO	A	devB	017	2IEN	protease	P03368	2.515e-06	-4.33868
1N2E	A,B	panC	MRC	1JZS	isoleucyl-trna synthetase	P56690	2.518e-06	-8.40494
1Y10	A,B	Rv1264	C3D	2OUZ	estrogen receptor	P03372	2.547e-06	-10.8965
3D0S	A,B	Rv3676	T44	1HK2	serum albumin	P02768	2.547e-06	-7.61217
2FHH	A,H,B,C,D,E,F,G,I,J,K,L,M,N,O,P,Q,R,S,T,U,V,W,X,Y,Z,1,2	prcA, prcB	REA	2G78	cellular retinoic acid-binding protein 2	P29373	2.553e-06	-5.73961
1Y11	A	Rv1264	REA	2G78	cellular retinoic acid-binding protein 2	P29373	2.553e-06	-6.06786
1P45	A,B	inhA	EST	2OCF	estrogen receptor	P03372	2.562e-06	-10.8197
1P44	A,B	inhA	CIA	1UDU	cgmp-specific 3',5'-cyclic phosphodiesterase	O76074	2.597e-06	-5.84005
2GKN	A,B	glbN	PFL	1E7A	serum albumin	P02768	2.606e-06	-6.1812
1SJP	A,B	groEL	LEI	3H5G	unknown	P03367	2.632e-06	-2.32673
1Y10	A,B	Rv1264	STR	1YA3	mineralocorticoid receptor	P08235	2.643e-06	x
3I59	A,B	Rv3676	RAL	1ERR	estrogen receptor	P03372	2.652e-06	-10.8984
2FUM	A	pknB	EST	2OCF	estrogen receptor	P03372	2.667e-06	-11.853
2OAR	A,B,C,D,E	mscL	TAC	2TRT	tetracycline repressor class d	P0ACT4	2.68e-06	-6.99153
2BYO	A	lppX	DM1	3F8F	transcriptional regulator, padr-like family	A2RI36	2.728e-06	-4.57866
3CY0	A	cyp121	MT1	2INQ	dihydrofolate reductase	P0ABQ4	2.765e-06	-8.93822
2CBY	A,B,C,D,E,F,G	clpP	PFL	1E7A	serum albumin	P02768	2.879e-06	-7.0891
3I54	A,B	Rv3676	TES	2Q7I	androgen receptor	P10275	2.888e-06	-9.10457
1BVR	C,D,E,F	inhA	OHT	2JF9	estrogen receptor	P03372	2.916e-06	-8.2298
3FNE	A,B,C,D	inhA	OHT	2BJ4	estrogen receptor	P03372	2.921e-06	-8.41436
2FUM	A	pknB	OHT	3ERT	protein (estrogen receptor alpha)	P03372	2.934e-06	-8.46375
3FNF	A,B,C,D	inhA	RFP	2HW2	rifampin adp-ribosyl transferase	O67972	2.99e-06	x
3FNF	A,B,C,D	inhA	OHT	2JF9	estrogen receptor	P03372	2.998e-06	-8.33564
3COY	A,B	panC	MRC	1JZS	isoleucyl-trna synthetase	P56690	3.027e-06	-10.903
2W3H	A,B	devS	LYA	3K2H	dihydrofolate reductase/thymidylate synthase	A7ASX7	3.054e-06	-9.08668
2H7N	A	inhA	REA	1XLS	retinoic acid receptor rxr-alpha	P19793	3.082e-06	-8.2771
1XDI	A,B	lpdA	017	3GGU	protease	P03367	3.115e-06	-4.30668
1Q74	A	mshB	VDN	1UHO	cgmp-specific 3',5'-cyclic phosphodiesterase	O76074	3.125e-06	-7.8963
3FNE	A,B,C,D	inhA	CIA	1UDU	cgmp-specific 3',5'-cyclic phosphodiesterase	O76074	3.134e-06	-7.5232
3FNF	A,B,C,D	inhA	CIA	1UDU	cgmp-specific 3',5'-cyclic phosphodiesterase	O76074	3.196e-06	-7.93935
3FPA	A,B,C,D	bioD	T44	1HK2	serum albumin	P02768	3.213e-06	-8.86956
2NSD	A	inhA	REA	3FC6	retinoic acid receptor rxr-alpha	P19793	3.23e-06	-7.8075
1Y10	A,B	Rv1264	LYA	3K2H	dihydrofolate reductase/thymidylate synthase	A7ASX7	3.24e-06	-7.17877
2BYO	A	lppX	RFP	1SKX	orphan nuclear receptor pxr	O75469	3.261e-06	x
1P45	A,B	inhA	RAL	2QXS	estrogen receptor	P03372	3.284e-06	-9.14434
2OAR	A,B,C,D,E	mscL	RFP	2HW2	rifampin adp-ribosyl transferase	O67972	3.311e-06	x
3I59	A,B	Rv3676	TFP	1WRL	troponin c, slow skeletal and cardiac muscles	P63316	3.338e-06	-10.9036
3FPA	A,B,C,D	bioD	T44	1HK1	serum albumin	P02768	3.351e-06	-8.86956
2O8X	A,B,C	sigC	486	2W8Y	progesterone receptor	P06401	3.454e-06	-10.6814
1NGK	A,B,C,D,E,F,G,H,I,J,K,L	glbO	JN3	2JN3	fatty acid-binding protein, liver	P80226	3.482e-06	-9.50388
3FNH	A	inhA	PFL	1E7A	serum albumin	P02768	3.482e-06	-7.04014
3I59	A,B	Rv3676	EST	1QKT	estradiol receptor	P03372	3.504e-06	-7.8708
3I59	A,B	Rv3676	T44	1HK3	serum albumin	P02768	3.509e-06	-10.8972
3FHZ	A,B,C,D,E,F	argR	T44	1HK3	serum albumin	P02768	3.531e-06	-4.99204
3HA7	A	mmaA4	MTX	2OIP	chain a, crystal structure of dhfr	Q5CGA3	3.569e-06	-4.39877
3FNF	A,B,C,D	inhA	DES	3ERD	protein (estrogen receptor alpha)	P03372	3.594e-06	-4.92837
2H34	A	pknE	9RA	3H0A	retinoic acid receptor rxr-alpha	P19793	3.604e-06	-6.64648
2GLN	A,B	glbN	T44	1HK1	serum albumin	P02768	3.61e-06	x
3GVC	A,B	Rv1941	OHT	2JF9	estrogen receptor	P03372	3.616e-06	-10.8889
2A86	A,B	panC	RIT	1SH9	pol polyprotein	P03367	3.654e-06	-9.79901
3COW	A,B	panC	MRC	1JZS	isoleucyl-trna synthetase	P56690	3.713e-06	-8.33142
3CIS	A,B	TB31.7	MT1	2INQ	dihydrofolate reductase	P0ABQ4	3.716e-06	-9.15087
3ICO	A	devB	017	2F81	pol polyprotein	P04587	3.751e-06	-4.33834
3FHZ	A,B,C,D,E,F	argR	DR7	3EL9	protease	P03369	3.755e-06	-8.38677
2GKM	A,B	glbN	VIA	2H42	cgmp-specific 3',5'-cyclic phosphodiesterase	O76074	3.838e-06	-6.63586
1P45	A,B	inhA	OHT	2BJ4	estrogen receptor	P03372	3.864e-06	-8.39411
1N2J	A,B	panC	MRC	1JZS	isoleucyl-trna synthetase	P56690	3.865e-06	-10.8841
2PZI	A	pknG	1UN	1OHR	aspartylprotease	Q9Q288	3.894e-06	-10.8496
2BYO	A	lppX	P1Z	2BXP	serum albumin	P02768	3.908e-06	-5.69336
2ZSB	A	coaA	IMN	2BXM	serum albumin	P02768	3.913e-06	-6.91104
2PZI	A	pknG	LYA	1JU6	thymidylate synthase	P04818	3.915e-06	-5.66967
3DC2	A,B	serA1	RIT	1N49	protease	P03369	3.923e-06	-10.9055
1SJP	A,B	groEL	TES	2Q7J	androgen receptor	P10275	3.948e-06	-6.48372
3D0S	A,B	Rv3676	TDZ	2VN0	cytochrome p450 2c8	P10632	3.956e-06	-8.48131
1BVR	C,D,E,F	inhA	VDN	3B2R	cgmp-specific 3',5'-cyclic phosphodiesterase	O76074	3.958e-06	-9.99518
1Y10	A,B	Rv1264	LEI	3H5G	unknown	P29477	3.969e-06	-4.43024
3FNE	A,B,C,D	inhA	REA	1G5Y	retinoic acid receptor rxr-alpha	P19793	3.98e-06	-6.9182
1Y10	A,B	Rv1264	SNL	2AB2	mineralocorticoid receptor	P08235	3.984e-06	x
1P44	A,B	inhA	VIA	1UDT	cgmp-specific 3',5'-cyclic phosphodiesterase	O76074	3.985e-06	-7.08528
2AP9	A,B,C,D,E,F	argB	OHT	2JF9	estrogen receptor	P03372	4.01e-06	-5.54409
1K0R	A	nusA	NDR	1SQN	progesterone receptor	P06401	4.081e-06	x
3I54	A,B	Rv3676	OHT	2FSZ	estrogen receptor beta	Q92731	4.152e-06	-8.40725
1NGK	A,B,C,D,E,F,G,H,I,J,K,L	glbO	TES	1JTV	17 beta-hydroxysteroid dehydrogenase type 1	P14061	4.167e-06	-9.772
3DKI	A,B	cysM	EST	1A52	estrogen receptor	P03372	4.197e-06	-8.03087
1BVR	C,D,E,F	inhA	VIA	1UDT	cgmp-specific 3',5'-cyclic phosphodiesterase	O76074	4.229e-06	-9.25499
1SJP	A,B	groEL	TES	2Q7I	androgen receptor	P10275	4.254e-06	-6.48372
1K0R	A	nusA	REA	3FC6	retinoic acid receptor rxr-alpha	P19793	4.294e-06	-7.02733
3FHZ	A,B,C,D,E,F	argR	T44	1HK1	serum albumin	P02768	4.304e-06	-4.99233
1XDI	A,B	lpdA	RIT	1SH9	pol polyprotein	P03367	4.322e-06	-8.30981
3COZ	A,B	panC	MRC	1JZS	isoleucyl-trna synthetase	P56690	4.337e-06	-10.1828
3DKI	A,B	cysM	OHT	1VJB	estrogen-related receptor gamma	P62509	4.37e-06	-6.16874
2QHF	A	aroF	MT1	2INQ	dihydrofolate reductase	P0ABQ4	4.392e-06	-7.19204
3E3A	A,B	bpoC	1CA	2Q3Y	unknown	P03367	4.424e-06	-6.29661
2CE3	A,B,C,D,E,F,G,H,I,J,K,L,M,N	clpP	PFL	1E7A	serum albumin	P02768	4.426e-06	-7.19265
2BZR	A,B,C,D,E,F	accD5	MTK	2NNI	cytochrome p450 2c8	P10632	4.464e-06	-10.7819
1Y10	A,B	Rv1264	TCL	1P45	enoyl-[acyl-carrier-protein] reductase [nadh]	P0A5Y6	4.477e-06	-8.23516
3FNH	A	inhA	RFP	2HW2	rifampin adp-ribosyl transferase	O67972	4.489e-06	x
2A87	A,B	trxB2	TCL	1P45	enoyl-[acyl-carrier-protein] reductase [nadh]	P0A5Y6	4.498e-06	-7.3222
2GLN	A,B	glbN	IMN	2BXQ	serum albumin	P02768	4.504e-06	x
3I59	A,B	Rv3676	486	1NHZ	glucocorticoid receptor	P04150	4.547e-06	-8.95121
3I59	A,B	Rv3676	T44	1HK1	serum albumin	P02768	4.558e-06	-10.8972
3IVY	A	cyp125	REA	3FAL	retinoic acid receptor rxr-alpha	P19793	4.639e-06	-7.34789
1P44	A,B	inhA	VDN	3B2R	cgmp-specific 3',5'-cyclic phosphodiesterase	O76074	4.652e-06	-8.7275
3FMF	A,B	bioD	T44	1HK2	serum albumin	P02768	4.722e-06	-7.36479
2H34	A	pknE	OHT	2JF9	estrogen receptor	P03372	4.731e-06	-7.97455
3I54	A,B	Rv3676	TES	2Q7J	androgen receptor	P10275	4.733e-06	-9.10457
3GVG	A,B	tpiA	AB1	2RKF	protease retropepsin	A0F7J4	4.751e-06	-6.69148
2B7O	A,B	aroG	REA	3FAL	retinoic acid receptor rxr-alpha	P19793	4.751e-06	-6.26397
2H7N	A	inhA	REA	1FM6	retinoic acid receptor rxr-alpha	P19793	4.78e-06	-8.23207
3I59	A,B	Rv3676	EST	1A52	estrogen receptor	P03372	4.797e-06	-7.8708
1SJP	A,B	groEL	TES	2Q7K	androgen receptor	P10275	4.802e-06	-6.48372
3D0S	A,B	Rv3676	JN3	2JN3	fatty acid-binding protein, liver	P80226	4.809e-06	-8.90652
2BYO	A	lppX	REA	1EPB	epididymal retinoic acid-binding protein	P06911	4.815e-06	-9.04783
3DC2	A,B	serA1	ROC	3EL4	protease	P03369	4.869e-06	-10.0656
3E3A	A,B	bpoC	REA	3DZU	retinoic acid receptor rxr-alpha	P19793	4.922e-06	-5.35622
1Y10	A,B	Rv1264	RAL	2JFA	corepressor peptide,estrogen receptor	P03372	4.949e-06	-4.86167
1P45	A,B	inhA	DES	3ERD	protein (estrogen receptor alpha)	P03372	4.997e-06	-5.4009
2FUM	A	pknB	RAL	2JFA	corepressor peptide,estrogen receptor	P03372	5.025e-06	-8.31461
2FF4	A,E	embR	REA	3CWK	cellular retinoic acid-binding protein 2	P29373	5.043e-06	-7.27734
1YK3	A	mbtK	RAL	1QKN	estrogen receptor beta	Q62986	5.062e-06	-10.5883
2IVM	A,B	lrpA	T3	1SN5	transthyretin	Q9PTT3	5.128e-06	-8.57462
2CBY	A,B,C,D,E,F,G	clpP	TES	2Q7L	androgen receptor	P10275	5.187e-06	x
1N2H	A,B	panC	MRC	1JZS	isoleucyl-trna synthetase	P56690	5.216e-06	-10.0243
2H34	A	pknE	REA	2ACL	retinoic acid receptor rxr-alpha	P19793	5.251e-06	-6.50311
3I59	A,B	Rv3676	REA	2NNH	cytochrome p450 2c8	P10632	5.298e-06	-10.8967
3DC2	A,B	serA1	RIT	1RL8	protease retropepsin	P03367	5.327e-06	-10.9055
3CIS	A,B	TB31.7	RIT	1RL8	protease retropepsin	P03367	5.332e-06	-10.5297
3D0S	A,B	Rv3676	OHT	2BJ4	estrogen receptor	P03372	5.41e-06	-7.37413
3FNE	A,B,C,D	inhA	RAL	1QKN	estrogen receptor beta	Q62986	5.436e-06	-7.80318
2H34	A	pknE	RAL	1QKN	estrogen receptor beta	Q62986	5.555e-06	-9.88709
1Y10	A,B	Rv1264	REA	2ACL	retinoic acid receptor rxr-alpha	P19793	5.615e-06	-10.3198
2O8X	A,B,C	sigC	NDR	1SQN	progesterone receptor	P06401	5.653e-06	-9.49978
3FNF	A,B,C,D	inhA	REA	1XDK	retinoic acid receptor rxr-alpha,retinoic acid receptor, bet	P22605,P28700	5.668e-06	-6.87164
1Y11	A	Rv1264	REA	2NNH	cytochrome p450 2c8	P10632	5.683e-06	-6.06787
1Y10	A,B	Rv1264	OHT	1S9Q	estrogen-related receptor gamma	P62509	5.743e-06	-10.8782
3FNF	A,B,C,D	inhA	BEP	1DTL	cardiac troponin c	P09860	5.772e-06	-4.17892
1N40	A	cyp121	LYA	3K2H	dihydrofolate reductase/thymidylate synthase	A7ASX7	5.824e-06	-6.98949
3I59	A,B	Rv3676	RFP	2HW2	rifampin adp-ribosyl transferase	O67972	5.953e-06	-7.19722
1XDI	A,B	lpdA	017	1T3R	protease retropepsin	P03369	5.978e-06	-4.30673
2G9W	A,B	blaI	T44	1HK2	serum albumin	P02768	5.98e-06	-7.96837
3FMF	A,B	bioD	T44	1HK1	serum albumin	P02768	6.047e-06	-7.36479
3D0S	A,B	Rv3676	EST	1FDW	17-beta-hydroxysteroid dehydrogenase	P14061	6.114e-06	-9.61839
2VZZ	A,B,C,D	Rv0802c	NVP	1JLB	hiv-1 rt a-chain,hiv-1 rt b-chain	P04585	6.126e-06	-9.08525
2BYO	A	lppX	P1Z	2BXQ	serum albumin	P02768	6.161e-06	-5.69323
2FUM	A	pknB	RAL	2QXS	estrogen receptor	P03372	6.245e-06	-8.27492
1NL3	A,B	secA1	T44	1HK3	serum albumin	P02768	6.305e-06	x
2GP6	A,B	kasB	TAC	2TRT	tetracycline repressor class d	P0ACT4	6.357e-06	x
3FNF	A,B,C,D	inhA	LEI	3H5G	unknown	P10275	6.407e-06	-3.90309
2NSD	A	inhA	REA	2ACL	retinoic acid receptor rxr-alpha	P19793	6.408e-06	-7.80585
2ZYL	A	kshA	1N1	3G5D	proto-oncogene tyrosine-protein kinase src	P00523	6.416e-06	-6.7641
1K0R	A	nusA	LEI	3H5G	unknown	P03369	6.452e-06	-4.40856
3IMG	A,B	panC	MRC	1JZS	isoleucyl-trna synthetase	P56690	6.485e-06	-10.8134
2AP9	A,B,C,D,E,F	argB	EST	1ERE	estrogen receptor	P03372	6.575e-06	-11.264
3I59	A,B	Rv3676	MTX	3DAT	dihydrofolate reductase	Q81R22	6.578e-06	-5.61313
1P44	A,B	inhA	VDN	1UHO	cgmp-specific 3',5'-cyclic phosphodiesterase	O76074	6.583e-06	-8.7431
2PFC	A	fcoT	198	1Z95	androgen receptor	P10275	6.629e-06	-7.20882
3D0S	A,B	Rv3676	EAA	1GSE	glutathione transferase	P08263	6.724e-06	-8.28432
3I59	A,B	Rv3676	MTX	3CL9	bifunctional dihydrofolate reductase-thymidylate synthase (d	Q27793	6.742e-06	-5.61424
2H7N	A	inhA	REA	1K74	retinoic acid receptor rxr-alpha	P19793	6.806e-06	-8.224
3FNF	A,B,C,D	inhA	EST	1QKT	estradiol receptor	P03372	6.807e-06	-11.0614
2OZ5	A	ptbB	RFP	2HW2	rifampin adp-ribosyl transferase	O67972	6.837e-06	-7.22741
3DDN	A,B	serA1	DR7	2FXD	unknown	Q27743	6.845e-06	-10.8911
2PZI	A	pknG	DR7	3EL9	protease	P03369	6.9e-06	-8.41183
1P44	A,B	inhA	RFP	2HW2	rifampin adp-ribosyl transferase	O67972	6.909e-06	x
1Y10	A,B	Rv1264	DEX	1P93	glucocorticoid receptor	P04150	7.042e-06	x
1NL3	A,B	secA1	T44	1HK1	serum albumin	P02768	7.048e-06	x
1N2B	A,B	panC	MRC	1JZS	isoleucyl-trna synthetase	P56690	7.116e-06	-8.3405
2VHX	A,B,C,D,E,F	ald	ROC	3D1X	hiv-1 protease	P04587	7.151e-06	-10.9055
3I59	A,B	Rv3676	MTK	2NNI	cytochrome p450 2c8	P10632	7.233e-06	-10.8861
2FHH	A,H,B,C,D,E,F,G,I,J,K,L,M,N,O,P,Q,R,S,T,U,V,W,X,Y,Z,1,2	prcA, prcB	TCL	1P45	enoyl-[acyl-carrier-protein] reductase [nadh]	P0A5Y6	7.262e-06	-6.04138
3IVX	A,B	panC	MRC	1JZS	isoleucyl-trna synthetase	P56690	7.267e-06	-7.88088
3I54	A,B	Rv3676	OHT	3ERT	protein (estrogen receptor alpha)	P03372	7.291e-06	-8.40028
3D0S	A,B	Rv3676	STR	2AA5	mineralocorticoid receptor	P08235	7.394e-06	-9.29273
2H7I	A	inhA	PFL	1E7A	serum albumin	P02768	7.416e-06	-8.74216
3DC2	A,B	serA1	1UN	3EL5	protease	P03369	7.46e-06	-8.90911
1XDI	A,B	lpdA	478	1T7J	pol polyprotein	P35963	7.468e-06	-4.69201
3CIS	A,B	TB31.7	RIT	2B60	gag-pol polyprotein	Q7SMT3	7.481e-06	-10.5299
1BVR	C,D,E,F	inhA	REA	1G5Y	retinoic acid receptor rxr-alpha	P19793	7.482e-06	-8.55919
2GL3	A,B	glbN	PFL	1E7A	serum albumin	P02768	7.493e-06	-5.62953
2PZI	A	pknG	AB1	2QHC	protease retropepsin	P03367	7.497e-06	-10.5757
3CXZ	A	cyp121	EST	1A27	17-beta-hydroxysteroid-dehydrogenase	P14061	7.547e-06	-9.27477
3IVG	A,B	panC	017	3BVB	protease (retropepsin)	P03367	7.568e-06	-6.35944
3FNF	A,B,C,D	inhA	RAL	2QXS	estrogen receptor	P03372	7.598e-06	-10.2844
1P45	A,B	inhA	OHT	2JF9	estrogen receptor	P03372	7.601e-06	-8.39415
1BVR	C,D,E,F	inhA	OHT	2GPV	estrogen-related receptor gamma	P62508	7.613e-06	-8.2548
1M1M	A,B	fabH	RIT	1SH9	pol polyprotein	P03367	7.619e-06	-10.3173
3IME	A,B	panC	MRC	1JZS	isoleucyl-trna synthetase	P56690	7.66e-06	-10.185
2O8X	A,B,C	sigC	198	1Z95	androgen receptor	P10275	7.683e-06	-6.68175
1M1M	A,B	fabH	RIT	1N49	protease	P03369	7.69e-06	-8.95457
1NL3	A,B	secA1	T44	1HK2	serum albumin	P02768	7.732e-06	x
1Q74	A	mshB	VIA	1UDT	cgmp-specific 3',5'-cyclic phosphodiesterase	O76074	7.803e-06	-6.6592
1NL3	A,B	secA1	BEP	1DTL	cardiac troponin c	P09860	7.815e-06	-6.17746
3FHZ	A,B,C,D,E,F	argR	MIX	2FUM	probable serine/threonine-protein kinase pknb	P0A5S4	7.855e-06	-3.44292
2EV3	A,B	Rv1264	LYA	3K2H	dihydrofolate reductase/thymidylate synthase	A7ASX7	7.894e-06	-5.89293
1I80	A,B,C	deoD	RAL	1QKN	estrogen receptor beta	Q62986	7.895e-06	-10.8782
3I54	A,B	Rv3676	OHT	1VJB	estrogen-related receptor gamma	P62509	7.896e-06	-8.40753
2B37	A,B,E,F	inhA	017	3EBZ	protease	P04584	7.913e-06	-6.72821
2O8X	A,B,C	sigC	EST	1A27	17-beta-hydroxysteroid-dehydrogenase	P14061	7.956e-06	-10.6368
2WUE	A	bphD	EST	1A27	17-beta-hydroxysteroid-dehydrogenase	P14061	7.963e-06	-10.5156
1M1M	A,B	fabH	1UN	1OHR	aspartylprotease	Q9Q288	8.004e-06	-8.90984
1Y10	A,B	Rv1264	RAL	1ERR	estrogen receptor	P03372	8.048e-06	-4.86167
2QZ8	A,B,C,D	lrpA	T44	1SN0	transthyretin	Q9PTT3	8.127e-06	-8.86787
3CXZ	A	cyp121	LYA	3K2H	dihydrofolate reductase/thymidylate synthase	A7ASX7	8.188e-06	-6.41642
3FPA	A,B,C,D	bioD	REA	3DZU	retinoic acid receptor rxr-alpha	P19793	8.192e-06	-5.55242
2B37	A,B,E,F	inhA	017	3GGT	protease	P03367	8.236e-06	-6.72881
1YS7	A,B	prrA	T44	1HK2	serum albumin	P02768	8.315e-06	-5.61228
1K0R	A	nusA	REA	2G78	cellular retinoic acid-binding protein 2	P29373	8.334e-06	-7.02729
2FHG	A,H,B,C,D,E,F,G,I,J,K,L,M,N,O,P,Q,R,S,T,U,V,W,X,Y,Z,1,2	prcA, prcB	IMN	2BXM	serum albumin	P02768	8.349e-06	-8.09981
2ZSB	A	coaA	IMN	2BXQ	serum albumin	P02768	8.375e-06	-6.91104
2FHH	A,H,B,C,D,E,F,G,I,J,K,L,M,N,O,P,Q,R,S,T,U,V,W,X,Y,Z,1,2	prcA, prcB	RAL	1ERR	estrogen receptor	P03372	8.522e-06	-7.81998
3EE4	A	nrdB	478	3EM3	protease	P03369	8.563e-06	-4.73188
3D0S	A,B	Rv3676	STI	2OIQ	proto-oncogene tyrosine-protein kinase src	P00523	8.571e-06	-6.70584
2GL3	A,B	glbN	REA	3DZU	retinoic acid receptor rxr-alpha	P19793	8.573e-06	-5.86473
2A8X	A,B	lpd	MT1	2INQ	dihydrofolate reductase	P0ABQ4	8.587e-06	-9.16511
1XDI	A,B	lpdA	017	3D1Z	hiv-1 protease	P04587	8.632e-06	-4.31285
2H7L	A	inhA	CIA	1UDU	cgmp-specific 3',5'-cyclic phosphodiesterase	O76074	8.66e-06	-7.86565
2A86	A,B	panC	MTX	1DDS	dihydrofolate reductase	P0ABQ4	8.72e-06	-4.80749
2GKN	A,B	glbN	VIA	2H42	cgmp-specific 3',5'-cyclic phosphodiesterase	O76074	8.749e-06	-6.79237
3CY1	A	cyp121	EST	1A27	17-beta-hydroxysteroid-dehydrogenase	P14061	8.756e-06	-10.0952
2BZR	A,B,C,D,E,F	accD5	RIT	2B60	gag-pol polyprotein	Q7SMT3	8.804e-06	-10.9055
3DKI	A,B	cysM	OHT	2BJ4	estrogen receptor	P03372	8.814e-06	-6.16907
3FNE	A,B,C,D	inhA	OHT	2FSZ	estrogen receptor beta	Q92731	8.843e-06	-8.41179
2GP6	A,B	kasB	T44	1HK2	serum albumin	P02768	8.845e-06	-8.90977
2JAX	A	TB31.7	MTX	1TDR	telluromethionyl dihydrofolate reductase	P00379	8.846e-06	-3.58085
2B37	A,B,E,F	inhA	MK1	1HSH	hiv-1 protease	P04584	8.969e-06	-10.9009
3I59	A,B	Rv3676	VDN	3B2R	cgmp-specific 3',5'-cyclic phosphodiesterase	O76074	9.027e-06	-10.221
3D0S	A,B	Rv3676	OHT	2JF9	estrogen receptor	P03372	9.028e-06	-7.37258
1XDI	A,B	lpdA	478	3EKV	protease	P03369	9.06e-06	-4.64708
1NKT	A,B	secA1	CIA	1XOZ	cgmp-specific 3',5'-cyclic phosphodiesterase	O76074	9.091e-06	-6.52769
2VF2	A,B	bphD	TES	1JTV	17 beta-hydroxysteroid dehydrogenase type 1	P14061	9.095e-06	-9.41139
2WM5	A	cyp124	017	3GGT	protease	P03367	9.103e-06	-5.33019
3D0S	A,B	Rv3676	BEP	1DTL	cardiac troponin c	P09860	9.105e-06	-3.99774
3HEM	A	cmaA2	MTX	2OIP	chain a, crystal structure of dhfr	Q5CGA3	9.151e-06	-4.70506
1K0R	A	nusA	1CA	2ABI	mineralocorticoid receptor	P08235	9.17e-06	x
2GLN	A,B	glbN	T44	1HK2	serum albumin	P02768	9.211e-06	x
1Y10	A,B	Rv1264	EST	1QKT	estradiol receptor	P03372	9.277e-06	x
2BYO	A	lppX	P1Z	2BXC	serum albumin	P02768	9.318e-06	-5.69344
1XDI	A,B	lpdA	MK1	1HSG	hiv-1 protease	P03367	9.332e-06	-8.53291
1YS7	A,B	prrA	T44	1HK3	serum albumin	P02768	9.377e-06	-5.61227
3EE4	A	nrdB	AB1	2Z54	hiv-1 protease	P04587	9.388e-06	-8.52822
3COZ	A,B	panC	MTX	1DDS	dihydrofolate reductase	P0ABQ4	9.394e-06	-5.84185
3E3A	A,B	bpoC	TES	1JTV	17 beta-hydroxysteroid dehydrogenase type 1	P14061	9.425e-06	-8.92877
3DA8	A,B	purN	REA	3FAL	retinoic acid receptor rxr-alpha	P19793	9.501e-06	x
1XDI	A,B	lpdA	ROC	3D1Y	hiv-1 protease	P04587	9.701e-06	-10.5849
1N2G	A,B	panC	MRC	1JZS	isoleucyl-trna synthetase	P56690	9.718e-06	-10.8217
2BYO	A	lppX	BAX	1UWJ	b-raf proto-oncogene serine/threonine-protein kinase	P15056	9.748e-06	-6.85266
1XDI	A,B	lpdA	017	3BVB	protease (retropepsin)	P03367	9.76e-06	-4.30668
3IVG	A,B	panC	MRC	1JZS	isoleucyl-trna synthetase	P56690	9.761e-06	-10.8838
1P44	A,B	inhA	TA1	2P4N	unknown	P62965	9.774e-06	-9.58077
1U9O	A,B	ethR	TCL	1UH5	enoyl-acp reductase	Q6LFB9	9.775e-06	-6.33705
1Y10	A,B	Rv1264	REA	1XDK	retinoic acid receptor rxr-alpha,retinoic acid receptor, bet	P22605,P28700	9.809e-06	-10.3201
3I59	A,B	Rv3676	RFP	1SKX	orphan nuclear receptor pxr	O75469	9.828e-06	-7.19722
3D0S	A,B	Rv3676	EST	2OCF	estrogen receptor	P03372	9.887e-06	-9.61839
2FEZ	A	embR	REA	3CWK	cellular retinoic acid-binding protein 2	P29373	9.909e-06	-6.78755
3IVC	A,B	panC	MRC	1JZS	isoleucyl-trna synthetase	P56690	9.918e-06	-10.8598
1XDI	A,B	lpdA	RFP	1I6V	dna-directed rna polymerase	Q9KWU6,Q9KWU7	9.958e-06	-7.00212
2FF4	A,E	embR	REA	3FC6	retinoic acid receptor rxr-alpha	P19793	9.996e-06	-7.27711
