# Supplementary material for: The Mycobacterium tuberculosis Drugome and Its Polypharmacological Implications
Source: PLoS Comput Biol. 2010 Nov 4;6(11):e1000976. doi: 10.1371/journal.pcbi.1000976 (PMC2973814; doi:10.1371/journal.pcbi.1000976)
Supplement: Table S3 — Cross-fold drug-target pairs in the TB-drugome (for M.tb homology models only). This file contains a list of the cross-fold drug-target pairs with a SMAP P-value <1.0e-5, for homology models of M.tb proteins only. For each pair, information about the drug and target structures is given, as well as the corresponding SMAP P-value (indicating the significance of the binding site similarity) and eHiTS energy score (from docking the drug into the predicted binding site in the M.tb protein). (0.15 MB XLS) [file pcbi.1000976.s008.xls]

## Sheet: Sheet1
M.tb model code	M.tb protein	Drug target PDB code	Drug LIG code	SMAP P-value	ehits energy score
15610894.3	proV	2BXF	DZP	5.033e-12	-4.47094
15607626.1	Rv0485	1S9P	DES	9.48e-11	-6.98039
15607626.1	Rv0485	2P7Z	OHT	2.458e-10	-10.8904
15607915.1	Rv0775	3CWK	REA	6.773e-10	-8.17164
15607224.1	Rv0082	1TDR	MTX	8.939e-10	-5.45038
15607641.2	proC	1HK1	T44	1.985e-09	-6.20985
15607915.1	Rv0775	2G78	REA	2.014e-09	-8.18354
15607641.2	proC	1HK2	T44	2.27e-09	-6.20985
15608304.1	narI	2KAD	308	3.626e-09	-5.09335
15607641.2	proC	1HK3	T44	4.09e-09	-6.20965
15608842.1	cycA	2KAD	308	4.559e-09	-7.58027
15607915.1	Rv0775	2FR3	REA	4.644e-09	-8.18523
15609348.2	gcvT	1XZQ	FON	5.021e-09	-6.87875
15607626.1	Rv0485	2GPV	OHT	9.174e-09	-10.8995
15609402.1	Rv2265	2KAD	308	1.014e-08	-4.73763
15610053.1	ffh	2JFA	RAL	1.14e-08	-8.35533
15607176.1	Rv0034	2BXQ	IMN	1.156e-08	-8.90861
15608425.2	cysD	2G78	REA	1.263e-08	-6.04534
15608331.1	Rv1191	1TDR	MTX	1.344e-08	-7.19488
15610848.2	Rv3712	1HK1	T44	1.514e-08	-6.39226
15608353.2	glgC	1EPB	REA	1.537e-08	-10.2486
15608331.1	Rv1191	4DFR	MTX	1.773e-08	-7.17589
15608425.2	cysD	3CWK	REA	1.873e-08	-6.04534
15607915.1	Rv0775	1CBS	REA	1.973e-08	-8.11832
15607626.1	Rv0485	1VJB	OHT	2.002e-08	-10.8995
15607831.3	Rv0691c	1HK3	T44	2.026e-08	-10.6727
15608425.2	cysD	1HK1	T44	2.07e-08	-6.19083
15607831.3	Rv0691c	1HK1	T44	2.485e-08	-10.7266
15607593.1	Rv0452	2G78	REA	2.583e-08	-10.9051
15610848.2	Rv3712	1HK2	T44	2.732e-08	-6.3724
15607179.1	Rv0037c	2B60	RIT	2.744e-08	-10.9055
15609923.2	ribF	1E7A	PFL	2.843e-08	-6.0089
15609550.1	Rv2413c	2FUM	MIX	3.242e-08	-4.75644
15608693.1	frdD	2G78	REA	3.452e-08	-6.80618
15608425.2	cysD	1HK3	T44	3.935e-08	-6.19124
15609550.1	Rv2413c	3H5G	LEI	3.993e-08	-4.40074
15610049.2	Rv2912c	3CWK	REA	4.013e-08	-7.1188
15607996.1	Rv0856	2HW2	RFP	4.193e-08	x
15608304.1	narI	1K74	REA	4.302e-08	-6.1623
15608412.1	Rv1272c	2TRT	TAC	4.361e-08	-5.34091
15608538.2	lipI	2HW2	RFP	4.566e-08	x
15610053.1	ffh	2OUZ	C3D	4.586e-08	-7.98792
15608425.2	cysD	1HK2	T44	4.801e-08	-6.19124
15608304.1	narI	3DZU	REA	4.873e-08	-6.1623
15608397.2	Rv1257c	1QKT	EST	4.946e-08	-7.44774
15607224.1	Rv0082	1DDR	MTX	5.093e-08	-5.48281
15608331.1	Rv1191	3DRC	MTX	5.739e-08	-7.19421
15610848.2	Rv3712	1HK3	T44	5.832e-08	-6.39315
15608150.2	ksgA	3GR6	TCL	6.119e-08	-5.98008
15610943.1	Rv3807c	2KAD	308	6.151e-08	-8.88601
15610780.2	Rv3644c	2KAD	308	6.18e-08	-5.36917
15607469.2	Rv0328	2KAD	308	6.402e-08	-5.54049
15610894.3	proV	2VN0	TDZ	6.737e-08	-8.83339
15608331.1	Rv1191	2DRC	MTX	6.838e-08	-7.16377
57117052.1	mmr	2G78	REA	6.921e-08	-7.60263
15610642.1	fadD17	1SH9	RIT	6.993e-08	-10.7731
15608957.2	ilvG	3BVB	017	7.271e-08	-7.07157
57117141.2	Rv3659c	2NNH	REA	7.986e-08	-6.63909
15609197.1	Rv2060	2KAD	308	8.732e-08	-3.67228
15609509.2	Rv2372c	1E7A	PFL	8.774e-08	-9.69909
15608765.3	Rv1627c	2G78	REA	9.652e-08	-7.20731
15608439.2	prfA	3H5G	LEI	9.852e-08	-2.78228
15609866.1	Rv2729c	2KAD	308	9.923e-08	-5.1195
15610844.3	asd	2PYM	1UN	1.008e-07	-8.55906
15607576.2	Rv0435c	3EIG	MTX	1.026e-07	-7.19131
15608304.1	narI	1FM6	REA	1.039e-07	-6.1623
15610642.1	fadD17	3GGT	017	1.061e-07	-8.90978
15610053.1	ffh	1HK2	T44	1.09e-07	-5.70937
15610053.1	ffh	2JF9	OHT	1.143e-07	-8.3624
15608115.3	fadE13	2PYM	1UN	1.162e-07	-10.9054
15608330.2	Rv1190	2KAD	308	1.237e-07	-7.27924
15608273.2	metE	2OUZ	C3D	1.331e-07	-7.66278
15608957.2	ilvG	3D1Z	017	1.335e-07	-7.09392
15608331.1	Rv1191	1DDR	MTX	1.36e-07	-7.19488
15608331.1	Rv1191	1RA3	MTX	1.4e-07	-7.1884
15608957.2	ilvG	2PYN	1UN	1.44e-07	-8.90929
15607915.1	Rv0775	1CBR	REA	1.46e-07	-8.18385
15610855.2	Rv3719	1YA3	STR	1.513e-07	-9.49243
15608304.1	narI	3C9J	308	1.538e-07	-5.09335
15608304.1	narI	1FM9	REA	1.595e-07	-6.1623
15607641.2	proC	1FM9	REA	1.628e-07	-8.96957
15609866.1	Rv2729c	3F8F	DM1	1.645e-07	-7.19564
15609919.2	pepR	1XOZ	CIA	1.655e-07	x
15609459.2	rocD1	2HW2	RFP	1.67e-07	-7.13399
15607217.2	Rv0075	2OUZ	C3D	1.682e-07	-10.3529
15610844.3	asd	3EL5	1UN	1.695e-07	-8.35654
15608672.2	Rv1534	3K2H	LYA	1.8e-07	-7.47391
15609832.1	Rv2695	1E7A	PFL	1.813e-07	-9.79118
15608549.1	lprG	1EPB	REA	1.839e-07	-3.85593
15608481.2	Rv1341	2NNH	REA	1.868e-07	-10.9049
15608957.2	ilvG	2RKF	AB1	1.869e-07	-10.8906
15608481.2	Rv1341	2VN0	TDZ	1.923e-07	-6.44417
15607217.2	Rv0075	1A52	EST	1.958e-07	x
15608412.1	Rv1272c	2UXO	TAC	1.962e-07	-5.34091
15609148.2	Rv2011c	2INQ	MT1	2e-07	-8.90977
15609550.1	Rv2413c	2KAD	308	2.008e-07	-8.46397
15607470.1	Rv0329c	1RA3	MTX	2.057e-07	-7.53
15609550.1	Rv2413c	1XDK	REA	2.106e-07	-8.8736
15607387.1	Rv0246	2KAD	308	2.144e-07	-3.32541
15607831.3	Rv0691c	1HK2	T44	2.304e-07	-10.7259
15609002.3	Rv1865c	1HPV	478	2.319e-07	-4.34809
15607176.1	Rv0034	2BXK	IMN	2.319e-07	-8.90861
15608481.2	Rv1341	2NNI	MTK	2.335e-07	-10.7787
15607184.1	Rv0042c	2HW2	RFP	2.354e-07	-5.63031
15608160.1	mfd	2JF9	OHT	2.354e-07	-8.19507
15609866.1	Rv2729c	2G78	REA	2.368e-07	-5.85636
15608957.2	ilvG	1C6Z	ROC	2.427e-07	x
15607641.2	proC	1FM6	REA	2.461e-07	-8.96957
15608439.2	prfA	1HK2	T44	2.464e-07	-5.56783
15607626.1	Rv0485	1A52	EST	2.546e-07	-10.039
15610049.2	Rv2912c	1FDW	EST	2.59e-07	-9.21414
15609277.2	TB18.6	2FXE	DR7	2.671e-07	-8.90978
15608115.3	fadE13	2Q63	1UN	2.703e-07	-10.8925
15607179.1	Rv0037c	3GGT	017	2.766e-07	-6.05086
15608262.3	gnd2	2JF9	OHT	2.788e-07	-8.1482
15608331.1	Rv1191	1DDS	MTX	2.791e-07	-7.16844
15610024.1	Rv2887	1CBR	REA	2.893e-07	-8.00328
15609866.1	Rv2729c	1CBR	REA	2.9e-07	-5.8557
15610339.3	lipV	1E7A	PFL	2.928e-07	-6.17523
15608262.3	gnd2	1QKT	EST	2.931e-07	-7.01978
15608672.2	Rv1534	2HW2	RFP	2.996e-07	x
15608538.2	lipI	2UXO	TAC	3.059e-07	-6.27034
15608672.2	Rv1534	1CBR	REA	3.064e-07	-6.72801
15608731.1	Rv1593c	1A52	EST	3.084e-07	-10.6778
15610431.3	Rv3295	1E7A	PFL	3.225e-07	-5.71723
15608957.2	ilvG	3EL1	DR7	3.231e-07	-6.97775
57117052.1	mmr	1P45	TCL	3.261e-07	-6.67292
15608693.1	frdD	3CWK	REA	3.367e-07	-6.68714
15609550.1	Rv2413c	1FDW	EST	3.464e-07	-8.57085
15608957.2	ilvG	3D1Y	ROC	3.465e-07	x
15608331.1	Rv1191	2KAD	308	3.519e-07	-7.35763
15608115.3	fadE13	2QAK	1UN	3.599e-07	-10.8909
15609148.2	Rv2011c	4DFR	MTX	3.603e-07	-8.90918
15608957.2	ilvG	2Q64	1UN	3.659e-07	-8.90929
15607626.1	Rv0485	2GPU	OHT	3.69e-07	-10.8926
15608150.2	ksgA	2FR3	REA	3.856e-07	-6.55921
57116803.1	uvrD1	3EIG	MTX	3.879e-07	-6.15476
15607187.3	Rv0045c	2VN0	TDZ	3.891e-07	-6.73221
15610943.1	Rv3807c	2HW2	RFP	3.903e-07	x
15608957.2	ilvG	2RKG	AB1	3.932e-07	-10.8906
15610844.3	asd	2R5Q	1UN	4.096e-07	-8.58276
15609876.2	Rv2739c	1DHI	MTX	4.13e-07	-7.13059
15607525.1	clpB	1S9P	DES	4.163e-07	-4.48952
15608693.1	frdD	1CBS	REA	4.166e-07	-6.80636
15607770.2	recB	2G78	REA	4.379e-07	-5.23745
15607470.1	Rv0329c	1DDS	MTX	4.398e-07	-7.51505
15608957.2	ilvG	2QAK	1UN	4.402e-07	-8.90929
15607641.2	proC	1E7A	PFL	4.404e-07	-4.31126
15608000.1	fadB	2G78	REA	4.413e-07	-6.16948
15610053.1	ffh	1ERR	RAL	4.467e-07	-8.34736
15608340.1	Rv1200	2KAD	308	4.469e-07	-4.96837
15610943.1	Rv3807c	1HK2	T44	4.489e-07	x
15608160.1	mfd	2BJ4	OHT	4.527e-07	-8.19507
15608006.1	moaE2	2KAD	308	4.546e-07	-6.17343
15608693.1	frdD	3B2R	VDN	4.679e-07	-6.99816
15609847.2	sigB	2ABI	1CA	4.686e-07	-4.69774
15607641.2	proC	1AO8	MTX	4.738e-07	-5.96345
15608767.1	polA	2JF9	OHT	4.787e-07	-8.37531
15610844.3	asd	2B60	RIT	4.826e-07	-10.8863
15608115.3	fadE13	2QHC	AB1	4.914e-07	-10.8927
15610780.2	Rv3644c	1HK3	T44	5.02e-07	-7.92637
15608115.3	fadE13	1K6C	MK1	5.184e-07	-10.9037
15607443.2	Rv0302	2HW2	RFP	5.188e-07	x
15608765.3	Rv1627c	1CBR	REA	5.201e-07	-7.20763
15608150.2	ksgA	1CBR	REA	5.407e-07	-6.55921
15608160.1	mfd	1E7A	PFL	5.417e-07	-7.17662
57116745.2	galE2	1HK1	T44	5.52e-07	-5.20054
57116782.1	ptrBb	1HK2	T44	5.538e-07	-6.38434
15610844.3	asd	2NNK	ROC	5.613e-07	-8.90973
15607626.1	Rv0485	2JF9	OHT	5.672e-07	-10.8894
15608957.2	ilvG	2Q63	1UN	5.707e-07	-8.90917
15608425.2	cysD	3H5G	LEI	5.808e-07	-2.85958
15609148.2	Rv2011c	2DRC	MTX	5.86e-07	-8.90963
15608767.1	polA	1A52	EST	5.864e-07	-10.6741
15609286.1	yfiH	3H5G	LEI	5.87e-07	-3.18838
15610844.3	asd	3EKW	DR7	5.948e-07	-10.7085
15607576.2	Rv0435c	1HK2	T44	6.066e-07	-7.98975
15608767.1	polA	1QKT	EST	6.094e-07	-10.6741
15608036.1	gltA	2HW2	RFP	6.142e-07	x
15608304.1	narI	2QXS	RAL	6.171e-07	-9.07872
15608398.1	Rv1258c	2G78	REA	6.206e-07	-5.06074
15610095.3	Rv2958c	3DZU	REA	6.395e-07	-8.3573
15608359.3	Rv1219c	1HK1	T44	6.403e-07	-7.38287
15607470.1	Rv0329c	2DRC	MTX	6.433e-07	-7.54179
15610053.1	ffh	1A52	EST	6.524e-07	-11.2914
15608115.3	fadE13	3EL1	DR7	6.55e-07	-10.8108
15607626.1	Rv0485	2G78	REA	6.55e-07	-10.1741
15609276.2	pyrD	1MUI	AB1	6.601e-07	-7.22852
15610707.1	hmp	1HK3	T44	6.607e-07	-7.67807
15610844.3	asd	2Q5K	AB1	6.635e-07	-9.27403
15610780.2	Rv3644c	3DFR	MTX	6.678e-07	-7.56114
15607224.1	Rv0082	4DFR	MTX	6.734e-07	-5.48671
15608957.2	ilvG	2PYM	1UN	6.742e-07	-8.90929
15608957.2	ilvG	3EKW	DR7	6.895e-07	-6.97775
15608412.1	Rv1272c	2VKE	TAC	6.921e-07	-5.34091
15607179.1	Rv0037c	3EM3	478	7.017e-07	-8.26875
15607996.1	Rv0856	2UXO	TAC	7.242e-07	-8.90715
15610645.3	ilvX	1E7A	PFL	7.273e-07	-10.1612
15610649.1	fadD18	2JN3	JN3	7.29e-07	-8.99724
15609148.2	Rv2011c	1DRA	MTX	7.377e-07	-7.51641
15607707.1	Rv0567	1Y9R	1CA	7.521e-07	-8.88355
15609525.1	hemN	3CWK	REA	7.58e-07	-8.84411
57116699.1	TB18.5	1A52	EST	7.626e-07	-11.2413
15610547.2	guaB2	3GN8	DEX	7.632e-07	-9.56949
15609277.2	TB18.6	1MUI	AB1	7.659e-07	-10.858
15607469.2	Rv0328	2HW2	RFP	7.687e-07	x
15607626.1	Rv0485	1S9Q	OHT	7.792e-07	-10.8995
15609148.2	Rv2011c	1TDR	MTX	7.818e-07	-8.90806
15608659.1	fadD25	1SN0	T44	7.823e-07	-5.38841
15607179.1	Rv0037c	3EL5	1UN	7.886e-07	-10.8966
57116782.1	ptrBb	1HK3	T44	7.901e-07	-6.38434
15608481.2	Rv1341	1CBR	REA	7.912e-07	-10.9044
15608331.1	Rv1191	1DRA	MTX	7.945e-07	-7.16039
15609436.1	htpG	2Q7L	TES	7.987e-07	-10.9581
15608813.2	Rv1675c	2BXQ	IMN	8.076e-07	-10.9053
15608115.3	fadE13	2PYN	1UN	8.099e-07	-10.8989
15610700.2	fadE33	2BJ4	OHT	8.125e-07	-10.8962
15609276.2	pyrD	2AQU	DR7	8.156e-07	-6.10832
15608957.2	ilvG	3EKY	DR7	8.211e-07	-7.11269
15610707.1	hmp	2HXH	TA1	8.33e-07	x
15610707.1	hmp	2HXF	TA1	8.33e-07	x
15610707.1	hmp	3DCO	TA1	8.333e-07	x
15607332.2	Rv0191	2KAD	308	8.342e-07	-8.60666
15609525.1	hemN	2G78	REA	8.355e-07	-8.86473
15610707.1	hmp	2WBE	TA1	8.361e-07	x
15608693.1	frdD	2FR3	REA	8.369e-07	-6.80618
15610707.1	hmp	3EDL	TA1	8.377e-07	x
15610844.3	asd	3EKX	1UN	8.405e-07	-8.58099
15608304.1	narI	3D4S	TIM	8.453e-07	-5.42197
15610316.1	Rv3180c	2DRC	MTX	8.466e-07	-4.8033
15608767.1	polA	1HK2	T44	8.48e-07	-7.46732
15610053.1	ffh	2FSZ	OHT	8.494e-07	-8.36198
15610707.1	hmp	2G78	REA	8.511e-07	-6.59476
15609550.1	Rv2413c	1P45	TCL	8.573e-07	-10.1259
15608412.1	Rv1272c	2NNI	MTK	8.648e-07	-10.9055
15610053.1	ffh	2BJ4	OHT	8.652e-07	-8.36077
15609119.1	Rv1982c	1SDT	MK1	8.703e-07	-10.7709
15609119.1	Rv1982c	2HS2	017	8.74e-07	-6.79984
15609866.1	Rv2729c	2Z54	AB1	8.745e-07	-10.8903
15607217.2	Rv0075	1ERR	RAL	8.895e-07	-8.8798
15610049.2	Rv2912c	1HK2	T44	8.903e-07	-5.13947
15610780.2	Rv3644c	2G78	REA	9.056e-07	-7.20184
15607366.1	Rv0225	1DRA	MTX	9.234e-07	-4.07192
15608439.2	prfA	1HK3	T44	9.263e-07	-5.56783
15610844.3	asd	3EBZ	017	9.266e-07	-6.79589
15607290.2	Rv0148	2G78	REA	9.281e-07	-5.77999
15608549.1	lprG	1HSH	MK1	9.291e-07	-10.8999
15609550.1	Rv2413c	3F8F	DM1	9.441e-07	x
15610707.1	hmp	1HK1	T44	9.456e-07	-6.27575
15610844.3	asd	3EKY	DR7	9.477e-07	-10.5828
15607179.1	Rv0037c	1SGU	MK1	9.542e-07	-10.9044
15608549.1	lprG	1P93	DEX	9.559e-07	-7.04831
15610624.1	Rv3488	2HW2	RFP	9.668e-07	x
15607526.2	Rv0385	1HK1	T44	9.685e-07	-5.54145
15609197.1	Rv2060	2HW2	RFP	9.739e-07	x
15609119.1	Rv1982c	3EM3	478	9.84e-07	-6.45077
15608957.2	ilvG	2BPX	MK1	9.845e-07	-4.21666
15608331.1	Rv1191	1RB3	MTX	9.896e-07	-7.19387
15607217.2	Rv0075	2GPV	OHT	1.016e-06	-10.8747
15608412.1	Rv1272c	3F8F	DM1	1.018e-06	-5.23602
15610303.1	Rv3167c	3EL9	DR7	1.026e-06	-10.9055
15608020.1	Rv0880	2HW2	RFP	1.027e-06	-5.71492
15607336.1	Rv0195	1G5Y	REA	1.05e-06	-4.85839
15610641.1	fadE27	2KAD	308	1.05e-06	-4.78959
15609464.2	Rv2327	1HK3	T44	1.055e-06	-6.13485
15609119.1	Rv1982c	2BPX	MK1	1.056e-06	-10.835
15608957.2	ilvG	3EKX	1UN	1.06e-06	-8.90929
15607224.1	Rv0082	1DDS	MTX	1.064e-06	-5.29245
15610339.3	lipV	3H5G	LEI	1.067e-06	-4.37832
57117141.2	Rv3659c	2VN0	TDZ	1.077e-06	x
15610316.1	Rv3180c	2INQ	MT1	1.078e-06	-7.48641
15608436.2	thrB	1CBR	REA	1.087e-06	-10.7228
15609119.1	Rv1982c	3BVB	017	1.094e-06	-6.7965
15609119.1	Rv1982c	1MUI	AB1	1.094e-06	-10.5309
15607217.2	Rv0075	2QXS	RAL	1.095e-06	-8.86185
15608262.3	gnd2	3ERD	DES	1.101e-06	-3.45119
15608450.3	atpD	2Q7L	TES	1.102e-06	-7.9211
15610049.2	Rv2912c	2G78	REA	1.104e-06	-7.11921
15607915.1	Rv0775	2HW2	RFP	1.107e-06	x
15607179.1	Rv0037c	2R5Q	1UN	1.11e-06	-10.8966
15610024.1	Rv2887	2G78	REA	1.112e-06	-8.00336
15608398.1	Rv1258c	3ERT	OHT	1.114e-06	-8.21562
15609499.1	recO	2JF9	OHT	1.114e-06	-8.91719
15610199.1	ligB	3K2H	LYA	1.153e-06	-4.8994
15608150.2	ksgA	2G78	REA	1.157e-06	-6.55921
15608693.1	frdD	1CBR	REA	1.157e-06	-6.80618
15607179.1	Rv0037c	3BVB	017	1.161e-06	-5.78727
57116745.2	galE2	1HK3	T44	1.165e-06	-5.20054
15609388.2	Rv2251	2OUZ	C3D	1.167e-06	-8.06838
15609277.2	TB18.6	3EL9	DR7	1.167e-06	-8.90978
15607928.2	purQ	1HK3	T44	1.171e-06	-8.7976
15608957.2	ilvG	2FXE	DR7	1.175e-06	-6.97775
15607470.1	Rv0329c	2INQ	MT1	1.18e-06	-7.70879
15607687.3	Rv0547c	3K2H	LYA	1.181e-06	-7.06431
15609777.1	Rv2640c	2BXF	DZP	1.186e-06	x
57116870.2	trxB1	3H5G	LEI	1.19e-06	-3.55973
15610707.1	hmp	2P4N	TA1	1.199e-06	x
15608957.2	ilvG	2Z54	AB1	1.237e-06	-10.7925
15608957.2	ilvG	1C6Y	MK1	1.238e-06	-4.21666
15610110.1	recG	2ABI	1CA	1.242e-06	-8.64968
15607366.1	Rv0225	1DDS	MTX	1.247e-06	-4.0478
15608304.1	narI	1CBS	REA	1.256e-06	-6.16267
15608957.2	ilvG	2QHC	AB1	1.257e-06	-10.8878
15610844.3	asd	3EL4	ROC	1.26e-06	-8.90973
15609521.2	mbtA	3FAL	REA	1.26e-06	-10.1796
15608331.1	Rv1191	1RG7	MTX	1.261e-06	-7.15603
15608115.3	fadE13	3GGT	017	1.263e-06	-7.08339
15610844.3	asd	2BPX	MK1	1.267e-06	-10.9047
15610316.1	Rv3180c	2G78	REA	1.272e-06	-5.83957
15608359.3	Rv1219c	2HW2	RFP	1.275e-06	-7.19653
15609289.1	murC	1FDW	EST	1.28e-06	x
15607179.1	Rv0037c	1T7I	017	1.28e-06	-5.89351
57116885.2	treY	3EM3	478	1.283e-06	-6.66048
15609349.1	Rv2212	1CBR	REA	1.285e-06	-7.51346
57117052.1	mmr	1CBR	REA	1.292e-06	-7.60231
15607179.1	Rv0037c	2NMY	ROC	1.298e-06	-10.9054
15609388.2	Rv2251	1FM9	REA	1.302e-06	-8.86338
15608731.1	Rv1593c	2P7Z	OHT	1.314e-06	-7.23525
15607217.2	Rv0075	2P7Z	OHT	1.338e-06	-10.8728
15609119.1	Rv1982c	1HSG	MK1	1.34e-06	-10.7709
15608330.2	Rv1190	3GGT	017	1.344e-06	-8.90935
15610339.3	lipV	1HK3	T44	1.345e-06	-7.63596
57117052.1	mmr	2NNH	REA	1.357e-06	-7.49501
15607179.1	Rv0037c	3EKX	1UN	1.359e-06	-10.8966
15608412.1	Rv1272c	1UDU	CIA	1.367e-06	-7.11156
15610642.1	fadD17	2W8Y	486	1.37e-06	x
15609277.2	TB18.6	2NMW	ROC	1.378e-06	-10.5529
15609148.2	Rv2011c	1DDS	MTX	1.387e-06	-7.83638
15608549.1	lprG	1P33	MTX	1.39e-06	-5.90643
15607179.1	Rv0037c	1HXW	RIT	1.409e-06	-10.9055
15608331.1	Rv1191	1UDU	CIA	1.418e-06	x
15609349.1	Rv2212	2JFA	RAL	1.42e-06	-9.45098
15609898.3	hsdS	3H5G	LEI	1.424e-06	-2.46644
15607626.1	Rv0485	3CWK	REA	1.43e-06	-10.059
57117141.2	Rv3659c	2NNI	MTK	1.446e-06	-8.41157
15608693.1	frdD	1UHO	VDN	1.455e-06	-7.04242
15609349.1	Rv2212	2G78	REA	1.455e-06	-7.51339
15607626.1	Rv0485	3FC6	REA	1.469e-06	-10.0563
15608549.1	lprG	2IYF	ERY	1.471e-06	-3.26197
15610191.2	Rv3054c	1UDU	CIA	1.472e-06	-3.71936
15607948.3	purF	3H5G	LEI	1.476e-06	-2.40617
15610844.3	asd	2O4K	DR7	1.495e-06	-10.7145
15610391.2	manA	2ACL	REA	1.504e-06	-6.003
15607224.1	Rv0082	1DRB	MTX	1.509e-06	-5.28555
15608398.1	Rv1258c	2BJ4	OHT	1.514e-06	-8.21564
15608115.3	fadE13	1RL8	RIT	1.517e-06	-10.9001
15608262.3	gnd2	2QXS	RAL	1.52e-06	-8.16947
15608304.1	narI	1CBR	REA	1.526e-06	-6.1623
15607179.1	Rv0037c	3EKY	DR7	1.532e-06	-3.81842
15610780.2	Rv3644c	4DFR	MTX	1.532e-06	-7.74048
15610844.3	asd	2RKG	AB1	1.54e-06	-9.27865
15607179.1	Rv0037c	2O4K	DR7	1.559e-06	-8.98158
15607645.1	Rv0504c	2HW2	RFP	1.563e-06	x
15609464.2	Rv2327	1HK2	T44	1.57e-06	-6.13485
15607332.2	Rv0191	2QXS	RAL	1.589e-06	-8.83593
15610191.2	Rv3054c	1XOZ	CIA	1.593e-06	-3.71936
15608115.3	fadE13	1MUI	AB1	1.606e-06	-10.6007
57116729.1	PPE9	2G78	REA	1.608e-06	-5.61519
57117119.2	fadD19	1Y9R	1CA	1.614e-06	-7.35964
15608331.1	Rv1191	2INQ	MT1	1.625e-06	-7.19347
15607179.1	Rv0037c	1T7J	478	1.631e-06	-8.78791
15608115.3	fadE13	3BVB	017	1.642e-06	-7.06866
15607217.2	Rv0075	2JF9	OHT	1.652e-06	-10.8747
15608549.1	lprG	2AVO	MK1	1.654e-06	-10.9044
15609119.1	Rv1982c	1T7J	478	1.663e-06	-6.67696
15609919.2	pepR	1UDU	CIA	1.664e-06	x
15610053.1	ffh	3IA4	MTX	1.666e-06	-5.65169
15610073.3	drrA	1P93	DEX	1.67e-06	-6.49667
15607179.1	Rv0037c	3D1Z	017	1.679e-06	-7.12446
15609593.1	Rv2456c	2INQ	MT1	1.68e-06	-9.14612
15607982.1	Rv0842	2KAD	308	1.71e-06	-4.95626
15610612.1	kgtP	2KAD	308	1.721e-06	-7.31283
15610844.3	asd	3D1Y	ROC	1.722e-06	-8.90973
15608481.2	Rv1341	1SKX	RFP	1.727e-06	x
15609733.1	Rv2596	1HK2	T44	1.736e-06	-0.078364
15608331.1	Rv1191	2G78	REA	1.739e-06	-10.3126
15610642.1	fadD17	2PYM	1UN	1.745e-06	-8.9242
15609405.2	cyp128	2HW2	RFP	1.748e-06	x
15607641.2	proC	3ERD	DES	1.755e-06	-4.84777
15607468.2	cyp135A1	1RV7	AB1	1.758e-06	-6.67559
15607366.1	Rv0225	1TDR	MTX	1.763e-06	-4.07052
15610844.3	asd	3EKQ	ROC	1.772e-06	-8.90973
15610609.1	bpoA	1HK3	T44	1.789e-06	-9.73727
15610031.1	xerC	3H0A	9RA	1.806e-06	x
15609119.1	Rv1982c	2IEO	017	1.812e-06	-6.80015
15608425.2	cysD	1CBS	REA	1.815e-06	-5.9183
15607626.1	Rv0485	3FAL	REA	1.822e-06	-10.0611
15607224.1	Rv0082	1RA3	MTX	1.825e-06	-5.48328
15608694.2	Rv1556	2INQ	MT1	1.831e-06	-9.39963
15608549.1	lprG	1RLB	REA	1.831e-06	-3.8564
15610053.1	ffh	1QKT	EST	1.831e-06	-11.2914
15607928.2	purQ	1HK2	T44	1.838e-06	-8.79822
15607627.2	mshA	1RG7	MTX	1.842e-06	-7.17714
15608304.1	narI	2G78	REA	1.851e-06	-6.1623
15610844.3	asd	3D1X	ROC	1.854e-06	-8.90973
15610609.1	bpoA	1HK1	T44	1.855e-06	-9.73727
15607593.1	Rv0452	2NNH	REA	1.868e-06	-10.9051
15607379.2	Rv0238	1P45	TCL	1.871e-06	-7.8588
15608767.1	polA	2OCF	EST	1.893e-06	-10.6741
15610168.2	Rv3031	2G78	REA	1.901e-06	-6.77007
15610303.1	Rv3167c	3GGU	017	1.902e-06	-6.80234
15607179.1	Rv0037c	1SDU	MK1	1.912e-06	-10.9041
15610844.3	asd	2O4S	AB1	1.922e-06	-9.27134
15609672.2	pepQ	2RKG	AB1	1.933e-06	-6.81679
15608262.3	gnd2	2BJ4	OHT	1.935e-06	-8.14789
15608115.3	fadE13	2B7Z	MK1	1.937e-06	-10.9029
15610844.3	asd	2QAK	1UN	1.94e-06	-8.48444
15608397.2	Rv1257c	2BPX	MK1	1.942e-06	-10.9055
15608115.3	fadE13	2FXE	DR7	1.949e-06	-10.808
15609918.2	Rv2781c	1C6Z	ROC	1.973e-06	-9.88517
15607399.1	Rv0258c	1CBR	REA	1.973e-06	-6.85926
15609710.3	Rv2573	1FEM	REA	1.985e-06	-7.48067
15609119.1	Rv1982c	2R5Q	1UN	1.993e-06	-7.96115
15609593.1	Rv2456c	1DRA	MTX	1.994e-06	-6.71628
15610780.2	Rv3644c	1HK1	T44	2.011e-06	-7.92637
15609636.1	Rv2499c	1EPB	REA	2.028e-06	-9.87482
15610844.3	asd	2AQU	DR7	2.029e-06	-10.7156
15610844.3	asd	3BVB	017	2.045e-06	-6.79643
15608957.2	ilvG	2NMW	ROC	2.056e-06	x
15607179.1	Rv0037c	2NNP	ROC	2.064e-06	-10.9047
15607613.3	Rv0472c	2G78	REA	2.079e-06	-10.7091
15609148.2	Rv2011c	3DRC	MTX	2.096e-06	-8.90932
15607996.1	Rv0856	2FSZ	OHT	2.102e-06	-10.8281
15607996.1	Rv0856	2OUZ	C3D	2.107e-06	-10.8179
15607641.2	proC	3DZU	REA	2.107e-06	-8.96957
15608672.2	Rv1534	1A27	EST	2.111e-06	-9.13974
15607707.1	Rv0567	1QKN	RAL	2.118e-06	-8.32588
15607996.1	Rv0856	1HK2	T44	2.119e-06	-7.76881
15609039.1	nanT	2BJ4	OHT	2.134e-06	-8.37024
15609593.1	Rv2456c	2DRC	MTX	2.149e-06	-6.71648
15607224.1	Rv0082	1DHJ	MTX	2.167e-06	-5.48201
15607187.3	Rv0045c	2NNI	MTK	2.192e-06	-10.9033
15609119.1	Rv1982c	3EM6	017	2.196e-06	-6.79984
15608412.1	Rv1272c	3GGT	017	2.204e-06	-5.99244
15609119.1	Rv1982c	3EKY	DR7	2.221e-06	-10.9055
15608111.2	echA7	1E7A	PFL	2.223e-06	-4.87584
15609896.2	Rv2759c	2UXO	TAC	2.224e-06	-7.17826
15607366.1	Rv0225	4DFR	MTX	2.241e-06	-4.01926
15610385.2	Rv3249c	1HK2	T44	2.243e-06	-7.25801
15608359.3	Rv1219c	1E7A	PFL	2.244e-06	-4.81632
15609499.1	recO	1HK1	T44	2.272e-06	-8.32591
15608767.1	polA	3ERT	OHT	2.273e-06	-8.37531
15607641.2	proC	2BJ4	OHT	2.277e-06	-8.34743
15610844.3	asd	1SGU	MK1	2.296e-06	-10.9047
15608304.1	narI	1FBY	REA	2.304e-06	-6.1623
15608957.2	ilvG	3EKQ	ROC	2.322e-06	x
15609388.2	Rv2251	1A52	EST	2.322e-06	-10.8134
15609455.2	uspC	3EM4	DR7	2.322e-06	-10.8473
15607641.2	proC	1XLS	REA	2.326e-06	-8.97005
57116780.1	Rv0774c	2INQ	MT1	2.338e-06	-9.25743
57116699.1	TB18.5	1GS4	ZK5	2.362e-06	x
15609499.1	recO	1HK3	T44	2.385e-06	-8.32591
15609116.2	Rv1979c	3EL0	1UN	2.39e-06	-8.74739
15610303.1	Rv3167c	1C6Y	MK1	2.391e-06	-10.9055
15608115.3	fadE13	2NMW	ROC	2.391e-06	-10.905
15607526.2	Rv0385	1HK2	T44	2.391e-06	-5.69488
15609495.1	Rv2358	1HK1	T44	2.392e-06	-7.29181
15608115.3	fadE13	1HSG	MK1	2.396e-06	-10.9029
15609148.2	Rv2011c	1DDR	MTX	2.4e-06	-8.90869
15607179.1	Rv0037c	2FXE	DR7	2.404e-06	-2.91317
15607209.2	Rv0067c	1E7A	PFL	2.404e-06	-9.09907
15609600.2	lipP	1Z2B	VLB	2.412e-06	x
15607576.2	Rv0435c	1SH9	RIT	2.416e-06	-6.71504
15607687.3	Rv0547c	1QKN	RAL	2.42e-06	-10.6682
15608115.3	fadE13	1HSH	MK1	2.428e-06	-10.9037
15608330.2	Rv1190	3EM3	478	2.428e-06	-7.16403
15607231.1	Rv0089	1HK1	T44	2.436e-06	-5.1653
15608914.1	Rv1776c	3F8F	DM1	2.439e-06	-8.06545
15607179.1	Rv0037c	2IEO	017	2.445e-06	-5.99054
15608050.1	Rv0910	1E7A	PFL	2.446e-06	-9.87218
15610844.3	asd	1HSG	MK1	2.45e-06	-10.9047
15610926.2	dprE1	1HK1	T44	2.453e-06	-5.79599
15610053.1	ffh	2QXS	RAL	2.455e-06	-8.32387
15607996.1	Rv0856	1DTL	BEP	2.457e-06	-8.92463
57117052.1	mmr	1HK3	T44	2.473e-06	-7.25588
57117119.2	fadD19	2O4S	AB1	2.474e-06	-8.93328
15608767.1	polA	1HK3	T44	2.475e-06	-7.46732
15609521.2	mbtA	1FBY	REA	2.491e-06	-10.177
15607179.1	Rv0037c	3EL9	DR7	2.497e-06	-2.76055
15609525.1	hemN	1CBR	REA	2.514e-06	-8.84411
15609119.1	Rv1982c	3EKW	DR7	2.525e-06	-10.9021
15609405.2	cyp128	2KAD	308	2.527e-06	-5.58013
15610707.1	hmp	1JFF	TA1	2.53e-06	x
15608813.2	Rv1675c	1G5Y	REA	2.531e-06	-10.9048
15609550.1	Rv2413c	2JN3	JN3	2.533e-06	x
15609405.2	cyp128	2UXO	TAC	2.552e-06	-5.53727
15608304.1	narI	1P93	DEX	2.568e-06	-7.03921
15609277.2	TB18.6	2BPX	MK1	2.579e-06	-8.90939
15609495.1	Rv2358	1HK3	T44	2.583e-06	-7.29181
15609509.2	Rv2372c	3B2R	VDN	2.604e-06	-4.78315
15608535.2	vapC10	2QXS	RAL	2.616e-06	-5.26989
15607366.1	Rv0225	1HK2	T44	2.616e-06	-7.19465
15608813.2	Rv1675c	2BXM	IMN	2.63e-06	-10.9053
15607641.2	proC	3E00	REA	2.631e-06	-8.97005
15608767.1	polA	2BJ4	OHT	2.65e-06	-8.37531
15607568.2	xthA	1E7A	PFL	2.67e-06	x
15609119.1	Rv1982c	3EM4	DR7	2.68e-06	-10.9055
15609119.1	Rv1982c	3EKV	478	2.681e-06	-6.68044
15609876.2	Rv2739c	2PYN	1UN	2.697e-06	-8.91336
15608115.3	fadE13	3EM3	478	2.711e-06	-8.02775
15610557.2	Rv3421c	1A52	EST	2.721e-06	-10.3189
15610780.2	Rv3644c	1JTV	TES	2.722e-06	-9.81372
15610626.2	otsA	3F8F	DM1	2.727e-06	-5.63584
15607641.2	proC	2G78	REA	2.728e-06	-8.96957
15607770.2	recB	1DTL	BEP	2.748e-06	-4.69277
15609499.1	recO	2TRT	TAC	2.766e-06	x
15610334.1	uvrD2	3EIG	MTX	2.772e-06	-7.19344
15610307.1	hpx	2BJ4	OHT	2.789e-06	-9.08973
15607179.1	Rv0037c	1OHR	1UN	2.789e-06	-10.8966
15608115.3	fadE13	3EKY	DR7	2.834e-06	-10.8098
15610452.1	sdhC	1XIU	REA	2.85e-06	-7.18347
15609550.1	Rv2413c	1NHG	TCL	2.851e-06	-10.1259
15609509.2	Rv2372c	2BXQ	IMN	2.863e-06	-8.90808
15608160.1	mfd	1QKT	EST	2.884e-06	-10.9636
15610761.1	mesJ	2JFA	RAL	2.889e-06	-6.43575
15608397.2	Rv1257c	2AQU	DR7	2.896e-06	-8.91004
15610844.3	asd	2NMY	ROC	2.898e-06	-8.90973
15607576.2	Rv0435c	1N49	RIT	2.899e-06	-6.71504
57117052.1	mmr	2BXF	DZP	2.902e-06	-5.79108
15609148.2	Rv2011c	2G78	REA	2.922e-06	-10.3338
15608160.1	mfd	1A52	EST	2.931e-06	-10.9636
15607468.2	cyp135A1	3EKQ	ROC	2.936e-06	-10.6925
57117052.1	mmr	1HK1	T44	2.936e-06	-7.25571
15610844.3	asd	1OHR	1UN	2.966e-06	-8.4165
15609866.1	Rv2729c	3EKW	DR7	2.972e-06	-10.9041
15608304.1	narI	3F8F	DM1	2.977e-06	-7.58251
15607793.1	Rv0653c	1JTV	TES	2.981e-06	-8.80878
15608486.2	fadE14	2G78	REA	2.984e-06	-6.86028
15607906.2	cyp123	3DZY	REA	2.993e-06	-6.81463
15608115.3	fadE13	1OHR	1UN	2.997e-06	-10.9054
57116780.1	Rv0774c	1UDU	CIA	3.012e-06	-8.55878
15608549.1	lprG	1HPV	478	3.029e-06	-6.7829
15607300.1	Rv0158	1DTL	BEP	3.035e-06	-8.35947
15610654.2	cyp142	1JTV	TES	3.035e-06	-5.55583
15608957.2	ilvG	1HXW	RIT	3.036e-06	-8.90845
15608160.1	mfd	2OUZ	C3D	3.038e-06	-6.5247
15608150.2	ksgA	1CBS	REA	3.053e-06	-6.56095
15607793.1	Rv0653c	1FDW	EST	3.056e-06	-7.76036
15607872.3	secY	3DFR	MTX	3.069e-06	-7.27514
15609866.1	Rv2729c	3EM3	478	3.072e-06	-7.08503
15608693.1	frdD	1UDT	VIA	3.073e-06	-6.78209
15607593.1	Rv0452	3CWK	REA	3.091e-06	-10.9051
15609636.1	Rv2499c	2VKE	TAC	3.093e-06	-7.12886
15607179.1	Rv0037c	3EL4	ROC	3.097e-06	-10.9054
15609550.1	Rv2413c	2G78	REA	3.105e-06	-8.8736
15609643.3	Rv2506	1E7A	PFL	3.111e-06	-6.90422
15609417.1	Rv2280	2NMY	ROC	3.113e-06	-10.9006
15608957.2	ilvG	1HPV	478	3.123e-06	-7.53421
15610024.1	Rv2887	1HK2	T44	3.127e-06	-7.14836
15609442.1	Rv2305	2G78	REA	3.143e-06	-6.7935
15610844.3	asd	2NMW	ROC	3.146e-06	-8.90973
57116885.2	treY	1P45	TCL	3.155e-06	-6.57433
15608115.3	fadE13	3GGU	017	3.165e-06	-7.06913
15607576.2	Rv0435c	2JN3	JN3	3.169e-06	-8.82765
15607187.3	Rv0045c	3K2H	LYA	3.177e-06	-6.80265
15609550.1	Rv2413c	3FAL	REA	3.179e-06	-8.8736
15610110.1	recG	3FL9	TOP	3.179e-06	-5.82144
15607179.1	Rv0037c	3EL1	DR7	3.186e-06	-3.23574
15609012.2	Rv1875	2G78	REA	3.196e-06	-5.09575
15608115.3	fadE13	2AQU	DR7	3.199e-06	-10.8077
15609093.1	higB1	2RIW	T44	3.206e-06	-5.32921
15609521.2	mbtA	3FC6	REA	3.207e-06	-10.1788
15609276.2	pyrD	3EKQ	ROC	3.214e-06	-10.6474
15610844.3	asd	1SH9	RIT	3.22e-06	-10.8369
15608315.2	fadH	2OUZ	C3D	3.236e-06	-8.35906
15609419.2	Rv2282c	1HK1	T44	3.262e-06	-5.19008
15609148.2	Rv2011c	1RB3	MTX	3.288e-06	-8.9063
15610303.1	Rv3167c	2PYN	1UN	3.295e-06	-10.048
15607179.1	Rv0037c	2AVO	MK1	3.348e-06	-10.9045
15607470.1	Rv0329c	1DRE	MTX	3.351e-06	-7.52928
15608000.1	fadB	1CBR	REA	3.358e-06	-6.16983
15607366.1	Rv0225	1DRE	MTX	3.359e-06	-4.07095
15610782.1	topA	3H5G	LEI	3.393e-06	-3.82565
15610844.3	asd	1SDV	MK1	3.395e-06	-10.9047
15609119.1	Rv1982c	3EL1	DR7	3.396e-06	-10.9043
15608864.2	Rv1726	1SDV	MK1	3.408e-06	-10.9055
15609349.1	Rv2212	2UXO	TAC	3.409e-06	-7.66571
15609599.1	tig	2QAK	1UN	3.411e-06	-10.4012
15609052.2	aceAa	3K2H	LYA	3.412e-06	-6.09185
15610844.3	asd	2AVV	MK1	3.453e-06	-10.9047
15608672.2	Rv1534	4DFR	MTX	3.461e-06	-7.17374
15609733.1	Rv2596	1E7A	PFL	3.474e-06	-8.27896
15609509.2	Rv2372c	2G78	REA	3.481e-06	-9.73054
15608115.3	fadE13	3D1X	ROC	3.486e-06	-10.9055
15608320.1	pks3	1JTV	TES	3.509e-06	-8.23107
15608262.3	gnd2	1RG7	MTX	3.519e-06	-8.76492
15610339.3	lipV	1HK2	T44	3.52e-06	-7.63596
15607224.1	Rv0082	2DRC	MTX	3.521e-06	-5.28966
15610926.2	dprE1	1HK3	T44	3.537e-06	-5.79534
15610544.1	Rv3408	1DTL	BEP	3.542e-06	-8.90498
15608957.2	ilvG	3EM3	478	3.549e-06	-7.53651
15609388.2	Rv2251	2G78	REA	3.553e-06	-9.16164
15607507.3	Rv0366c	1UDU	CIA	3.577e-06	-6.89299
15609119.1	Rv1982c	3EL9	DR7	3.581e-06	-10.9055
15610316.1	Rv3180c	1HK2	T44	3.592e-06	-6.29202
15610642.1	fadD17	2F81	017	3.603e-06	-8.90978
15608914.1	Rv1776c	1FDU	EST	3.607e-06	-9.8813
15608150.2	ksgA	1HK1	T44	3.609e-06	-6.34169
15608957.2	ilvG	3D20	017	3.609e-06	-7.12579
15609832.1	Rv2695	3H5G	LEI	3.615e-06	-3.95469
15609119.1	Rv1982c	3GGU	017	3.618e-06	-6.80014
15610642.1	fadD17	1T3R	017	3.633e-06	-8.90978
15608115.3	fadE13	3EL5	1UN	3.639e-06	-10.9054
15608549.1	lprG	1XLS	REA	3.643e-06	-3.85649
15610125.2	leuC	1SGU	MK1	3.663e-06	-8.90856
15608115.3	fadE13	1HXW	RIT	3.672e-06	-10.9041
15609866.1	Rv2729c	3EKQ	ROC	3.698e-06	-10.905
15610780.2	Rv3644c	1XDK	REA	3.731e-06	-7.20184
15608115.3	fadE13	1SDV	MK1	3.732e-06	-10.9031
15608672.2	Rv1534	1AO8	MTX	3.747e-06	-7.17373
15607996.1	Rv0856	2W8Y	486	3.749e-06	-10.8967
15608782.2	tsnR	1E7A	PFL	3.755e-06	-9.55876
15607217.2	Rv0075	1S9P	DES	3.755e-06	-7.73764
15607707.1	Rv0567	2W8Y	NDR	3.795e-06	-10.2093
15609464.2	Rv2327	1HK1	T44	3.82e-06	-6.13493
15609436.1	htpG	2Q7K	TES	3.835e-06	-10.9581
15608115.3	fadE13	3EKQ	ROC	3.853e-06	-10.9055
15609119.1	Rv1982c	2FXE	DR7	3.861e-06	-10.9033
15608304.1	narI	1P45	TCL	3.888e-06	-7.25586
15608767.1	polA	2JFA	RAL	3.906e-06	-10.6259
15609733.1	Rv2596	1HK3	T44	3.915e-06	-0.078364
57116927.1	Rv1888A	2HW2	RFP	3.921e-06	x
15607463.2	udgA	3H0A	9RA	3.928e-06	-9.76886
15608150.2	ksgA	1HK3	T44	3.945e-06	-6.34266
15608115.3	fadE13	1SGU	MK1	3.951e-06	-10.9029
15608949.2	Rv1812c	1FDU	EST	3.954e-06	x
15610844.3	asd	1N49	RIT	3.957e-06	-10.8616
15609866.1	Rv2729c	1HPV	478	3.96e-06	-7.08559
15608262.3	gnd2	1N49	RIT	3.962e-06	-8.68007
15609587.2	rpfE	2Z54	AB1	3.975e-06	-5.94429
15607179.1	Rv0037c	2F80	017	3.986e-06	-7.10752
15610191.2	Rv3054c	3JWQ	VIA	3.991e-06	-6.79592
15608276.2	Rv1136	1UDU	CIA	4e-06	x
15609388.2	Rv2251	1CBR	REA	4.014e-06	-8.41793
15608731.1	Rv1593c	2JF9	OHT	4.025e-06	-7.23519
15610053.1	ffh	3H5G	LEI	4.035e-06	-3.3198
57117012.3	hemY	2BJ4	OHT	4.056e-06	-8.24334
15607179.1	Rv0037c	1C6Y	MK1	4.057e-06	-10.9029
15607650.1	hemA	2G78	REA	4.063e-06	-6.86124
15608412.1	Rv1272c	3B2R	VDN	4.065e-06	-7.82562
15608767.1	polA	3FL9	TOP	4.065e-06	-5.60433
15610642.1	fadD17	1HSG	MK1	4.067e-06	x
15609349.1	Rv2212	1JTV	TES	4.072e-06	-9.23603
15607300.1	Rv0158	1A27	EST	4.075e-06	x
15610626.2	otsA	2BXF	DZP	4.099e-06	-5.08341
15609119.1	Rv1982c	2R5P	MK1	4.13e-06	-10.7709
15610478.1	Rv3342	1HK3	T44	4.131e-06	-5.19637
15608150.2	ksgA	1HK2	T44	4.136e-06	-6.3418
15608676.2	ansA	1SDT	MK1	4.147e-06	-0.913698
15609593.1	Rv2456c	1TDR	MTX	4.154e-06	-6.79662
15610180.1	ctaD	1RLB	REA	4.161e-06	-6.15662
15608304.1	narI	1WRL	TFP	4.173e-06	-8.18506
15607179.1	Rv0037c	3CYX	ROC	4.238e-06	-10.9054
15608731.1	Rv1593c	1NHZ	486	4.239e-06	-8.90764
15607463.2	udgA	2HW2	RFP	4.254e-06	-9.16975
15609119.1	Rv1982c	3D20	017	4.284e-06	-6.79983
15608684.3	Rv1546	2BXM	IMN	4.285e-06	-10.1861
15610176.3	echA17	2KAD	308	4.305e-06	-5.01918
15609950.3	Rv2813	1G5Y	REA	4.307e-06	-8.45586
15610053.1	ffh	3ERD	DES	4.323e-06	-4.6925
15607626.1	Rv0485	1LWC	NVP	4.33e-06	-4.85553
15607869.3	xylB	3EBZ	017	4.344e-06	-7.01487
15609417.1	Rv2280	1SH9	RIT	4.354e-06	-8.90993
15609147.1	vapC15	3D90	NOG	4.363e-06	-8.89005
15608000.1	fadB	2FR3	REA	4.38e-06	-6.16983
15608398.1	Rv1258c	2KAD	308	4.403e-06	-5.28541
15608538.2	lipI	1P93	DEX	4.418e-06	-7.68705
57116810.2	moeA1	1SGU	MK1	4.431e-06	-10.5369
15607525.1	clpB	3EIG	MTX	4.441e-06	-5.88929
15608733.3	nadB	2V0M	KLN	4.468e-06	-10.13
15608957.2	ilvG	1N49	RIT	4.47e-06	-8.90845
15609197.1	Rv2060	2JN3	JN3	4.477e-06	-8.05855
15608141.1	arcA	1HK2	T44	4.482e-06	-8.87411
15607179.1	Rv0037c	3D1X	ROC	4.49e-06	-10.9054
15609722.2	Rv2585c	1CBS	REA	4.512e-06	x
15610053.1	ffh	1LIN	TFP	4.514e-06	-8.57838
15610844.3	asd	2AVO	MK1	4.527e-06	-10.9047
15610176.3	echA17	1HK1	T44	4.538e-06	-8.9069
15608439.2	prfA	1HK1	T44	4.556e-06	-5.56783
15610780.2	Rv3644c	1XLS	REA	4.564e-06	-7.2004
15610943.1	Rv3807c	3C9J	308	4.565e-06	-8.88601
15607387.1	Rv0246	2G78	REA	4.572e-06	-10.9033
15608412.1	Rv1272c	1RL8	RIT	4.583e-06	-10.9018
15610780.2	Rv3644c	2JFA	RAL	4.592e-06	-10.4696
15610053.1	ffh	2VKE	TAC	4.599e-06	-8.3044
15609950.3	Rv2813	1HK3	T44	4.606e-06	-5.75322
15610844.3	asd	2IDW	017	4.613e-06	-6.79643
57116749.1	gabP	3CWK	REA	4.614e-06	-4.88237
15609455.2	uspC	3D1Y	ROC	4.656e-06	-10.0813
15610641.1	fadE27	3C9J	308	4.697e-06	-4.78959
15609148.2	Rv2011c	1UDU	CIA	4.698e-06	-8.5833
15608662.1	Rv1524	2VN0	TDZ	4.701e-06	-8.37761
15608600.2	Rv1462	3CYX	ROC	4.702e-06	-7.9716
15608538.2	lipI	1TDR	MTX	4.705e-06	-6.47827
15607613.3	Rv0472c	3CWK	REA	4.724e-06	-10.5066
15609002.3	Rv1865c	3EKV	478	4.726e-06	-4.34782
15608412.1	Rv1272c	2INQ	MT1	4.734e-06	-7.35624
15609276.2	pyrD	3BVB	017	4.762e-06	-7.21336
57116803.1	uvrD1	1DLS	MTX	4.778e-06	-6.15665
15607300.1	Rv0158	2HW2	RFP	4.78e-06	x
15608765.3	Rv1627c	1P45	TCL	4.792e-06	-8.6352
15610180.1	ctaD	3C9J	308	4.8e-06	-8.35236
15608731.1	Rv1593c	1Y9R	1CA	4.8e-06	-7.08748
15607525.1	clpB	2GPV	OHT	4.817e-06	-8.34329
15609436.1	htpG	2Q7J	TES	4.824e-06	-10.9581
15608331.1	Rv1191	1FDW	EST	4.827e-06	-7.86609
15610700.2	fadE33	1A52	EST	4.831e-06	-10.1562
15608115.3	fadE13	3D1Y	ROC	4.834e-06	-10.9055
15610844.3	asd	2NNP	ROC	4.854e-06	-8.90973
15608684.3	Rv1546	2BXQ	IMN	4.868e-06	-10.1861
15609495.1	Rv2358	1FM9	REA	4.893e-06	-7.36423
15607626.1	Rv0485	2BJ4	OHT	4.932e-06	-10.8929
15607525.1	clpB	2P7Z	OHT	4.932e-06	-8.33751
15609733.1	Rv2596	2JF9	OHT	4.934e-06	-10.887
15609197.1	Rv2060	1CBR	REA	4.937e-06	-8.17437
15610231.3	Rv3094c	2NNH	REA	4.937e-06	-7.62844
15608549.1	lprG	1Q6I	FK5	4.94e-06	x
15608957.2	ilvG	1SDU	MK1	4.946e-06	-8.92484
15607793.1	Rv0653c	2HW2	RFP	4.949e-06	x
15609593.1	Rv2456c	1DHI	MTX	4.951e-06	-6.71648
15609119.1	Rv1982c	1HPV	478	4.965e-06	-6.66229
57116745.2	galE2	1HK2	T44	4.974e-06	-5.20068
15608403.2	amiB2	2B60	RIT	4.976e-06	-8.41349
15608549.1	lprG	3EKY	DR7	4.982e-06	-10.8435
57116870.2	trxB1	3D90	NOG	4.99e-06	x
15609710.3	Rv2573	1P93	DEX	5.004e-06	x
15610844.3	asd	3D20	017	5.007e-06	-6.79647
15608767.1	polA	2QXS	RAL	5.028e-06	-10.6257
15610844.3	asd	2F8G	017	5.039e-06	-6.79683
15610422.3	sigF	1DTL	BEP	5.054e-06	-5.71096
15609119.1	Rv1982c	1C6Y	MK1	5.055e-06	-10.7709
15607707.1	Rv0567	2ABI	1CA	5.059e-06	-8.88355
15607179.1	Rv0037c	1K6C	MK1	5.064e-06	-10.894
15610695.3	Rv3559c	1HK1	T44	5.067e-06	-5.61572
15607443.2	Rv0302	1JTV	TES	5.083e-06	-10.7903
15610569.1	Rv3433c	1MUI	AB1	5.088e-06	-7.73099
15609119.1	Rv1982c	2AVV	MK1	5.102e-06	-10.835
15607179.1	Rv0037c	2NMW	ROC	5.118e-06	-10.9026
15610339.3	lipV	1DDS	MTX	5.137e-06	-4.6846
15608397.2	Rv1257c	1SDV	MK1	5.158e-06	-10.9055
15608731.1	Rv1593c	1P45	TCL	5.162e-06	-7.77635
15608693.1	frdD	1XOZ	CIA	5.163e-06	-3.62407
15609417.1	Rv2280	3GGT	017	5.181e-06	-6.83833
15609550.1	Rv2413c	2ACL	REA	5.186e-06	-8.8736
15607928.2	purQ	1HK1	T44	5.188e-06	-8.79822
15608304.1	narI	1XLS	REA	5.214e-06	-6.1623
15610031.1	xerC	1P45	TCL	5.226e-06	-8.07482
15607179.1	Rv0037c	2AVV	MK1	5.226e-06	-10.9044
15607641.2	proC	1BZF	TMQ	5.242e-06	-7.35607
15609276.2	pyrD	1T3R	017	5.265e-06	-7.35555
15608957.2	ilvG	3CYX	ROC	5.277e-06	x
57116780.1	Rv0774c	2NNI	MTK	5.283e-06	-10.8861
15607994.1	Rv0854	1QKN	RAL	5.314e-06	-10.9054
15607831.3	Rv0691c	3GVU	STI	5.338e-06	-10.5557
15608957.2	ilvG	2NMY	ROC	5.345e-06	x
15608115.3	fadE13	2AVV	MK1	5.393e-06	-10.9029
15610780.2	Rv3644c	2BJ4	OHT	5.397e-06	-8.45035
15607179.1	Rv0037c	2IDW	017	5.428e-06	-7.11693
15608684.3	Rv1546	2BXK	IMN	5.432e-06	-10.1861
15607472.2	Rv0331	3EM4	DR7	5.446e-06	-8.63578
57117012.3	hemY	1HK3	T44	5.455e-06	-7.35848
15607568.2	xthA	2HW2	RFP	5.455e-06	x
15610024.1	Rv2887	3CWK	REA	5.481e-06	-8.00241
15609550.1	Rv2413c	2TRT	TAC	5.486e-06	x
15608398.1	Rv1258c	2HW2	RFP	5.505e-06	-7.45509
15607708.3	cyp135B1	3F8F	DM1	5.534e-06	-7.19137
15608359.3	Rv1219c	1HK2	T44	5.535e-06	-7.38283
15607224.1	Rv0082	1RG7	MTX	5.54e-06	-5.2852
15608331.1	Rv1191	1CBS	REA	5.544e-06	-10.3143
57117141.2	Rv3659c	1QKT	EST	5.546e-06	-7.45959
15607366.1	Rv0225	1DRB	MTX	5.562e-06	-4.07142
15609593.1	Rv2456c	2HDN	TAC	5.574e-06	-8.07031
15609119.1	Rv1982c	3EKQ	ROC	5.575e-06	-9.93525
15608765.3	Rv1627c	3CWK	REA	5.576e-06	-7.20458
15607179.1	Rv0037c	1SDT	MK1	5.585e-06	-10.9041
15607464.2	Rv0323c	2HW2	RFP	5.585e-06	x
15610024.1	Rv2887	2ABI	1CA	5.592e-06	-7.48142
15607224.1	Rv0082	3DAU	MTX	5.605e-06	-5.25199
15608731.1	Rv1593c	2BXD	RWF	5.651e-06	-5.57341
15607472.2	Rv0331	3GGT	017	5.704e-06	-6.09749
15609529.1	cysH	1SH9	RIT	5.734e-06	-10.8798
15607835.1	Rv0695	1HK1	T44	5.748e-06	-8.27639
15610297.2	Rv3161c	2JN3	JN3	5.755e-06	-9.65515
15607707.1	Rv0567	2JFA	RAL	5.764e-06	-8.32541
57116885.2	treY	1ESW	ACR	5.783e-06	-7.07469
15608115.3	fadE13	2R5Q	1UN	5.801e-06	-10.8908
15609276.2	pyrD	1HXW	RIT	5.802e-06	-10.9051
15608115.3	fadE13	2RKG	AB1	5.816e-06	-10.8896
15609691.2	Rv2554c	1DF7	MTX	5.828e-06	-5.18124
15609632.3	pdhC	1UDU	CIA	5.845e-06	-7.451
57117052.1	mmr	3CWK	REA	5.845e-06	-7.49455
15608141.1	arcA	1HK1	T44	5.856e-06	-8.87444
15608813.2	Rv1675c	1S9Q	OHT	5.865e-06	-10.9055
57116702.2	Rv0183	2QK8	MTX	5.872e-06	-5.58598
15607770.2	recB	3H5G	LEI	5.874e-06	-3.29831
15609147.1	vapC15	2W8Y	486	5.877e-06	-10.7163
15609866.1	Rv2729c	1HXW	RIT	5.903e-06	-10.9054
15607399.1	Rv0258c	3EL5	1UN	5.955e-06	-10.8964
15610844.3	asd	2F80	017	5.96e-06	-6.79646
15608672.2	Rv1534	2G78	REA	5.972e-06	-6.72801
15610391.2	manA	1XDK	REA	5.984e-06	-6.00287
15608150.2	ksgA	1EPB	REA	5.996e-06	-6.55921
15607469.2	Rv0328	1RX3	MTX	5.996e-06	-7.48235
15610645.3	ilvX	2KAD	308	6.036e-06	-5.58261
15609918.2	Rv2781c	1T7J	478	6.074e-06	-4.36095
15608160.1	mfd	2QXS	RAL	6.088e-06	-9.12367
15608549.1	lprG	1FEM	REA	6.143e-06	-3.85651
15608413.1	Rv1273c	3EKX	1UN	6.144e-06	-10.5443
15607217.2	Rv0075	1XOZ	CIA	6.145e-06	x
15609148.2	Rv2011c	1DRE	MTX	6.146e-06	-8.02464
15607336.1	Rv0195	2G78	REA	6.201e-06	-4.85839
57116803.1	uvrD1	1U72	MTX	6.202e-06	-5.94819
15608115.3	fadE13	2B60	RIT	6.202e-06	-10.9038
15607176.1	Rv0034	1CBS	REA	6.204e-06	-8.48018
15607641.2	proC	1LUD	TRR	6.204e-06	-6.97487
15607179.1	Rv0037c	2AVS	MK1	6.221e-06	-10.9045
15607353.2	nadR	1JTV	TES	6.232e-06	-8.95463
15610642.1	fadD17	2F8G	017	6.251e-06	-8.90978
15610024.1	Rv2887	1HK1	T44	6.268e-06	-7.14836
15610894.3	proV	1CBR	REA	6.298e-06	-6.03781
15610707.1	hmp	1HK2	T44	6.309e-06	-6.27748
15610431.3	Rv3295	2BXQ	IMN	6.336e-06	-7.78898
15607831.3	Rv0691c	1E7A	PFL	6.371e-06	-5.96851
15610303.1	Rv3167c	2HS2	017	6.382e-06	-6.80403
15609119.1	Rv1982c	3CYX	ROC	6.387e-06	-10.2261
15609175.1	Rv2038c	3FL9	TOP	6.391e-06	-8.38167
15610226.2	fadD13	1HSG	MK1	6.398e-06	-10.9055
15608359.3	Rv1219c	2QHC	AB1	6.407e-06	-10.9039
57116870.2	trxB1	1SQN	NDR	6.413e-06	x
15608538.2	lipI	3K2H	LYA	6.414e-06	-7.48136
15607217.2	Rv0075	2INQ	MT1	6.416e-06	-8.83726
15607576.2	Rv0435c	1T7I	017	6.423e-06	-6.81237
57117141.2	Rv3659c	1QKN	RAL	6.427e-06	-10.5841
15608450.3	atpD	1GS4	ZK5	6.435e-06	x
15610452.1	sdhC	1XLS	REA	6.459e-06	-7.1847
15609876.2	Rv2739c	2JF9	OHT	6.47e-06	-8.29732
15608397.2	Rv1257c	2PYM	1UN	6.497e-06	-8.90978
15608115.3	fadE13	2Z54	AB1	6.506e-06	-10.8921
15608395.2	Rv1255c	2BXP	P1Z	6.513e-06	-10.8837
15608000.1	fadB	1P45	TCL	6.518e-06	-8.16115
15610761.1	mesJ	2OUZ	C3D	6.535e-06	-5.62952
15608436.2	thrB	2AVS	MK1	6.538e-06	-2.62531
15610303.1	Rv3167c	1OHR	1UN	6.542e-06	-10.0685
15607704.2	gpsA	1HK3	T44	6.551e-06	-3.85138
15609276.2	pyrD	3GGU	017	6.562e-06	-7.40718
15610707.1	hmp	1E7A	PFL	6.569e-06	-6.74325
15610844.3	asd	3EL1	DR7	6.587e-06	-10.7305
15608412.1	Rv1272c	1T7I	017	6.587e-06	-5.98976
15608949.2	Rv1812c	2P7Z	OHT	6.593e-06	x
15607831.3	Rv0691c	2JN3	JN3	6.597e-06	-10.5952
15608535.2	vapC10	2INQ	MT1	6.609e-06	-6.11558
15609919.2	pepR	2OAX	SNL	6.611e-06	-8.39996
15607586.1	sigK	1UDU	CIA	6.617e-06	-7.00142
15607989.2	Rv0849	1DLS	MTX	6.632e-06	-6.19205
15610926.2	dprE1	3E00	REA	6.644e-06	-2.6139
15608150.2	ksgA	3DZU	REA	6.65e-06	-6.55921
15610053.1	ffh	3ERT	OHT	6.664e-06	-8.36196
15609419.2	Rv2282c	1HK3	T44	6.673e-06	-5.19008
15609119.1	Rv1982c	2AQU	DR7	6.688e-06	-10.9043
15609499.1	recO	1XLS	REA	6.693e-06	-5.29014
15609509.2	Rv2372c	3CWK	REA	6.697e-06	-9.73054
15607996.1	Rv0856	2J7X	EST	6.705e-06	-10.0152
15608412.1	Rv1272c	2NMY	ROC	6.737e-06	-10.9034
15607626.1	Rv0485	2ACL	REA	6.739e-06	-10.0968
15610339.3	lipV	1CBR	REA	6.757e-06	-8.1301
15610844.3	asd	1T7I	017	6.806e-06	-6.79681
15610707.1	hmp	2JF9	OHT	6.819e-06	-8.28326
15607835.1	Rv0695	1HK2	T44	6.823e-06	-8.27639
15607176.1	Rv0034	1P93	DEX	6.83e-06	x
57117141.2	Rv3659c	2JFA	RAL	6.855e-06	-10.5841
15607179.1	Rv0037c	3EKP	478	6.874e-06	-8.77926
15610053.1	ffh	2OCF	EST	6.879e-06	-11.2914
15609148.2	Rv2011c	1RG7	MTX	6.893e-06	-8.90868
15609722.2	Rv2585c	3H5G	LEI	6.895e-06	-4.02885
15610707.1	hmp	1CBR	REA	6.913e-06	-6.59476
15607576.2	Rv0435c	3EBZ	017	6.924e-06	-6.81333
15609119.1	Rv1982c	1SDU	MK1	6.955e-06	-10.8385
15608858.1	vapC12	1HK3	T44	6.961e-06	-7.18724
15608397.2	Rv1257c	1C6Y	MK1	6.989e-06	-10.9055
15610138.1	ilvC	2HW2	RFP	6.998e-06	-8.68775
15609775.1	Rv2638	1A52	EST	7.018e-06	x
15607179.1	Rv0037c	1N49	RIT	7.034e-06	-10.9055
15608111.2	echA7	2FR3	REA	7.04e-06	-7.37669
15607217.2	Rv0075	1HK3	T44	7.046e-06	-9.07055
15610176.3	echA17	1HK3	T44	7.051e-06	-8.9069
15607641.2	proC	3DFR	MTX	7.062e-06	-5.96345
15608439.2	prfA	2BXP	P1Z	7.084e-06	-8.14403
15610700.2	fadE33	2OUZ	C3D	7.102e-06	-8.7701
15608276.2	Rv1136	2KAD	308	7.113e-06	-4.77582
15608535.2	vapC10	1HK2	T44	7.113e-06	-8.55237
15610642.1	fadD17	2QHC	AB1	7.128e-06	-8.86181
15608915.3	cyp144	1SDV	MK1	7.136e-06	-10.9046
15608160.1	mfd	2G78	REA	7.144e-06	-7.1616
15609119.1	Rv1982c	1T7I	017	7.146e-06	-6.79984
15609550.1	Rv2413c	1CBR	REA	7.163e-06	-8.87392
15610780.2	Rv3644c	1FDW	EST	7.178e-06	-10.5784
15609119.1	Rv1982c	2F8G	017	7.187e-06	-6.79984
15609733.1	Rv2596	2GPV	OHT	7.187e-06	-10.8895
15607399.1	Rv0258c	2AVO	MK1	7.189e-06	-10.9055
15607469.2	Rv0328	1DDR	MTX	7.198e-06	-7.40978
15608304.1	narI	1A52	EST	7.198e-06	-7.05364
57116901.1	fadB3	1HK3	T44	7.224e-06	-5.42157
15609550.1	Rv2413c	1SN5	T3	7.233e-06	-8.84428
15607179.1	Rv0037c	2Q64	1UN	7.249e-06	-10.8967
15607463.2	udgA	1G5Y	REA	7.264e-06	-5.14092
15607835.1	Rv0695	1HK3	T44	7.269e-06	-8.27681
15608160.1	mfd	1FBY	REA	7.301e-06	-7.16211
15607366.1	Rv0225	3DRC	MTX	7.311e-06	-4.04913
15608672.2	Rv1534	1DHJ	MTX	7.313e-06	-7.18104
15607593.1	Rv0452	1FDU	EST	7.315e-06	x
15610780.2	Rv3644c	1FDU	EST	7.318e-06	-10.5784
15607682.2	menE	1XDK	REA	7.339e-06	-10.8707
15610478.1	Rv3342	1HK1	T44	7.363e-06	-5.19629
15609495.1	Rv2358	1HK2	T44	7.375e-06	-7.29181
15608412.1	Rv1272c	1T7J	478	7.396e-06	-7.72388
15607576.2	Rv0435c	1SGU	MK1	7.397e-06	-10.8342
15607775.1	hadA	2INQ	MT1	7.407e-06	-9.24181
15610943.1	Rv3807c	2G78	REA	7.416e-06	-7.53084
15609876.2	Rv2739c	3GGT	017	7.419e-06	-4.96362
15607770.2	recB	3CWK	REA	7.421e-06	-5.23827
15607772.2	echA3	2HW2	RFP	7.424e-06	x
15610780.2	Rv3644c	2O2S	TCL	7.448e-06	-7.21602
15609002.3	Rv1865c	3CWK	REA	7.477e-06	-7.07498
15610591.1	truA	2KAD	308	7.504e-06	-7.29098
15609002.3	Rv1865c	1N49	RIT	7.521e-06	-8.90978
15608416.1	Rv1276c	2HYY	STI	7.522e-06	-8.90978
57116870.2	trxB1	2W8Y	NDR	7.554e-06	x
15607908.2	aldA	2KAD	308	7.583e-06	x
15608549.1	lprG	3B2R	VDN	7.59e-06	-6.80592
15610452.1	sdhC	3DZU	REA	7.601e-06	-7.18333
15609226.3	pepE	1XOZ	CIA	7.609e-06	-8.25476
15607469.2	Rv0328	1QHS	CLM	7.619e-06	-4.91944
15609119.1	Rv1982c	3EKX	1UN	7.642e-06	-8.30077
15607179.1	Rv0037c	2Z54	AB1	7.646e-06	-9.82496
15607576.2	Rv0435c	3EKV	478	7.647e-06	-5.94905
15610994.2	gltD	2AVO	MK1	7.669e-06	-10.9053
15609550.1	Rv2413c	2R5Q	1UN	7.691e-06	-5.91194
15608535.2	vapC10	1S9P	DES	7.699e-06	-2.04133
15608436.2	thrB	2G78	REA	7.711e-06	-10.7246
15607179.1	Rv0037c	1C6Z	ROC	7.729e-06	-10.9054
15607568.2	xthA	1S9P	DES	7.754e-06	x
15607576.2	Rv0435c	2F8G	017	7.771e-06	-6.81237
15607179.1	Rv0037c	1T3R	017	7.799e-06	-6.15129
15609119.1	Rv1982c	1T3R	017	7.799e-06	-6.79983
15609119.1	Rv1982c	2AVO	MK1	7.811e-06	-10.8218
15610821.2	cyp137	1CBR	REA	7.846e-06	-8.14658
15609525.1	hemN	1E7A	PFL	7.863e-06	-6.23231
15610609.1	bpoA	1HK2	T44	7.875e-06	-9.73727
15610303.1	Rv3167c	2B7Z	MK1	7.877e-06	-10.9055
15610780.2	Rv3644c	3C9J	308	7.878e-06	-5.36917
15608439.2	prfA	2BXQ	P1Z	7.879e-06	-8.14403
15607217.2	Rv0075	2BJ4	OHT	7.892e-06	-10.8746
15607704.2	gpsA	4COX	IMN	7.892e-06	-10.8975
15607996.1	Rv0856	1HK3	T44	7.896e-06	-7.9055
15609550.1	Rv2413c	3FL9	TOP	7.934e-06	-7.76202
15607187.3	Rv0045c	2JF9	OHT	7.937e-06	-8.39897
15610242.3	prfB	3H5G	LEI	7.96e-06	-2.17658
15610695.3	Rv3559c	1HK3	T44	7.993e-06	-5.61572
15607576.2	Rv0435c	3CWK	REA	7.994e-06	-6.55736
15610844.3	asd	2IEO	017	8.06e-06	-6.79646
15609550.1	Rv2413c	1EPB	REA	8.06e-06	-8.8732
15609276.2	pyrD	3EBZ	017	8.084e-06	-7.21252
15607179.1	Rv0037c	2KAD	308	8.086e-06	-6.02782
15610319.3	Rv3183	3H5G	LEI	8.091e-06	-3.30565
15609509.2	Rv2372c	2KAD	308	8.169e-06	-5.42129
15610316.1	Rv3180c	1DDS	MTX	8.175e-06	-5.50756
15610065.2	tesA	1CBR	REA	8.175e-06	-7.25385
15610649.1	fadD18	1CBR	REA	8.181e-06	-6.2982
15610844.3	asd	2FXE	DR7	8.2e-06	-10.7876
15609226.3	pepE	2QXS	RAL	8.207e-06	-10.9054
57116780.1	Rv0774c	1G5Y	REA	8.214e-06	-4.60665
15608662.1	Rv1524	2NNI	MTK	8.228e-06	-9.8393
57116780.1	Rv0774c	1K74	REA	8.247e-06	-4.60665
15607775.1	hadA	1DRB	MTX	8.257e-06	-9.18887
15608397.2	Rv1257c	1HSH	MK1	8.261e-06	-10.9055
15608747.2	trpE	1QKN	RAL	8.261e-06	-9.52247
15608538.2	lipI	2INQ	MT1	8.277e-06	-9.138
15609918.2	Rv2781c	1C6Y	MK1	8.279e-06	-8.55984
15609866.1	Rv2729c	2O4S	AB1	8.29e-06	-10.8904
15610926.2	dprE1	3F8F	DM1	8.298e-06	-3.80345
15608340.1	Rv1200	3C9J	308	8.306e-06	-5.37774
15610591.1	truA	3FC6	REA	8.312e-06	-5.85287
15609276.2	pyrD	2RKF	AB1	8.333e-06	-7.22859
15608767.1	polA	1HK1	T44	8.358e-06	-7.46723
57116780.1	Rv0774c	2F8G	017	8.366e-06	-5.53193
15610452.1	sdhC	2RLF	RIM	8.374e-06	-4.6354
15607366.1	Rv0225	2INQ	MT1	8.394e-06	-4.50985
15607486.3	Rv0345	1E7A	PFL	8.401e-06	-9.11327
15607179.1	Rv0037c	2AQU	DR7	8.402e-06	-10.7171
15610385.2	Rv3249c	1P45	TCL	8.42e-06	-8.52713
15610844.3	asd	2B7Z	MK1	8.432e-06	-10.9047
15607179.1	Rv0037c	2F8G	017	8.436e-06	-5.83752
15608020.1	Rv0880	1HK2	T44	8.443e-06	-7.20053
15609277.2	TB18.6	3EL5	1UN	8.47e-06	-10.8538
15609277.2	TB18.6	2Q5K	AB1	8.474e-06	-10.858
15608767.1	polA	3B2R	VDN	8.502e-06	-8.01962
15607179.1	Rv0037c	3GGU	017	8.502e-06	-5.89332
15608413.1	Rv1273c	2G78	REA	8.508e-06	-6.79961
15610855.2	Rv3719	3K2H	LYA	8.53e-06	-8.93398
15610385.2	Rv3249c	1E7A	PFL	8.55e-06	-6.76377
15610053.1	ffh	1CBR	REA	8.576e-06	-6.24069
15608824.1	Rv1686c	3C9J	308	8.576e-06	-6.75257
15610303.1	Rv3167c	2QAK	1UN	8.588e-06	-10.0874
15610844.3	asd	1HXW	RIT	8.602e-06	-10.8616
15607399.1	Rv0258c	3DFR	MTX	8.654e-06	-7.81126
15610943.1	Rv3807c	1P45	TCL	8.665e-06	-6.2328
15608532.2	Rv1393c	2INQ	MT1	8.74e-06	-9.13461
15608020.1	Rv0880	1A29	TFP	8.778e-06	-6.46241
15610303.1	Rv3167c	1T7J	478	8.778e-06	-6.85082
15608160.1	mfd	2BXQ	IMN	8.81e-06	-8.82903
15609388.2	Rv2251	1QKT	EST	8.811e-06	x
15608436.2	thrB	3CYX	ROC	8.838e-06	-5.86461
15607469.2	Rv0328	2DRC	MTX	8.867e-06	-7.42764
15607332.2	Rv0191	1P45	TCL	8.87e-06	-8.69993
15608000.1	fadB	1XZX	T3	8.874e-06	-10.1015
15608549.1	lprG	3FAL	REA	8.884e-06	-3.85649
15608263.2	bpoB	2QHC	AB1	8.904e-06	-8.91379
15607278.3	cyp138	2DRC	MTX	8.904e-06	-4.83126
15607593.1	Rv0452	1CBR	REA	8.906e-06	-10.9051
15608684.3	Rv1546	3DZU	REA	8.921e-06	-8.03068
15608304.1	narI	1XOZ	CIA	8.931e-06	-7.53251
15607399.1	Rv0258c	1SGU	MK1	8.946e-06	-10.9055
15607576.2	Rv0435c	3GGT	017	8.954e-06	-6.81237
15607576.2	Rv0435c	3GGU	017	8.976e-06	-6.81237
15607387.1	Rv0246	3CWK	REA	8.985e-06	-10.9033
15607179.1	Rv0037c	2NNK	ROC	9.003e-06	-10.9055
15607908.2	aldA	3D4S	TIM	9.027e-06	-7.02963
15609349.1	Rv2212	3CWK	REA	9.04e-06	-7.51346
15608111.2	echA7	2G78	REA	9.042e-06	-7.37911
15610642.1	fadD17	1MUI	AB1	9.065e-06	-8.86181
15607217.2	Rv0075	1RG7	MTX	9.077e-06	-7.19455
15608425.2	cysD	2VN0	TDZ	9.085e-06	-8.27646
15610452.1	sdhC	3DZY	REA	9.086e-06	-7.18333
15608864.2	Rv1726	2W3V	TOP	9.092e-06	-5.9201
15607790.2	Rv0650	3GGT	017	9.114e-06	-4.71134
15607179.1	Rv0037c	1HPV	478	9.123e-06	-8.70523
15607576.2	Rv0435c	3EKX	1UN	9.126e-06	-10.5698
15609119.1	Rv1982c	1K6C	MK1	9.132e-06	-10.835
15610339.3	lipV	1HK1	T44	9.133e-06	-7.6361
15610303.1	Rv3167c	2O4S	AB1	9.137e-06	-10.9055
15609599.1	tig	2B60	RIT	9.146e-06	-7.20176
15609093.1	higB1	3CD2	MTX	9.17e-06	-7.30361
15609550.1	Rv2413c	1FBY	REA	9.174e-06	-8.8736
15610880.2	nmtR	1CBR	REA	9.195e-06	-7.53224
15609876.2	Rv2739c	1DHJ	MTX	9.199e-06	-7.12964
15610975.2	Rv3839	1HK3	T44	9.239e-06	-8.56935
15609119.1	Rv1982c	2Q63	1UN	9.318e-06	-7.96115
15610780.2	Rv3644c	1K74	REA	9.325e-06	-7.20184
15607576.2	Rv0435c	1HK3	T44	9.336e-06	-7.98975
15609330.1	ctaE	2KAD	308	9.348e-06	-4.1849
57116870.2	trxB1	2HW2	RFP	9.351e-06	x
15610110.1	recG	2JN3	JN3	9.37e-06	-8.96083
15610821.2	cyp137	2PYM	1UN	9.381e-06	-10.5401
15609550.1	Rv2413c	3B2R	VDN	9.387e-06	-8.8481
15607790.2	Rv0650	1HPV	478	9.402e-06	-5.6512
15607179.1	Rv0037c	2R5P	MK1	9.405e-06	-10.9041
15610649.1	fadD18	2VN0	TDZ	9.415e-06	-8.85705
15610645.3	ilvX	3DZY	REA	9.434e-06	-7.79116
15607176.1	Rv0034	2G78	REA	9.438e-06	-8.48018
15610962.3	fadD23	1P93	DEX	9.444e-06	x
57116699.1	TB18.5	2BXF	DZP	9.444e-06	-7.66848
15609148.2	Rv2011c	3CWK	REA	9.446e-06	-10.2221
15607525.1	clpB	3E00	REA	9.456e-06	-5.9727
15610431.3	Rv3295	1DF7	MTX	9.479e-06	-6.34143
15608549.1	lprG	2HW2	RFP	9.482e-06	x
15610303.1	Rv3167c	1MUI	AB1	9.493e-06	-10.9055
15607928.2	purQ	1SV5	65B	9.512e-06	-8.76031
15608397.2	Rv1257c	1OHR	1UN	9.521e-06	-8.90978
15607641.2	proC	3F8F	DM1	9.526e-06	-4.29658
15607869.3	xylB	2IDW	017	9.561e-06	-7.19424
15610840.1	gshA	1DF7	MTX	9.573e-06	-8.71085
15609134.1	ctpF	2KAD	308	9.582e-06	-5.16948
15609691.2	Rv2554c	3CWK	REA	9.608e-06	-6.10454
15608791.1	argJ	2HYY	STI	9.683e-06	-8.90569
15610303.1	Rv3167c	3EKX	1UN	9.716e-06	-10.0887
15609119.1	Rv1982c	2IDW	017	9.731e-06	-6.79985
15608115.3	fadE13	3EKW	DR7	9.738e-06	-10.7637
15609349.1	Rv2212	1QKT	EST	9.75e-06	-9.04951
15609012.2	Rv1875	3CWK	REA	9.751e-06	-5.09585
15610031.1	xerC	1K74	REA	9.763e-06	-10.6571
15610303.1	Rv3167c	3CYX	ROC	9.786e-06	-10.905
15608672.2	Rv1534	2INQ	MT1	9.786e-06	-8.7852
15607576.2	Rv0435c	2QXS	RAL	9.806e-06	-10.9038
15609499.1	recO	2ABI	1CA	9.82e-06	-8.72414
15607179.1	Rv0037c	2B7Z	MK1	9.821e-06	-10.9045
15610049.2	Rv2912c	1IOL	EST	9.83e-06	-9.21414
15608412.1	Rv1272c	2O4S	AB1	9.842e-06	-10.9048
15609968.2	echA16	2KAD	308	9.845e-06	x
15610994.2	gltD	1KIJ	NOV	9.863e-06	-10.713
15610303.1	Rv3167c	1K6C	MK1	9.877e-06	-10.9048
15609866.1	Rv2729c	2NNP	ROC	9.88e-06	-10.9035
15610645.3	ilvX	1FM6	REA	9.89e-06	-7.18789
15609876.2	Rv2739c	3EKY	DR7	9.921e-06	-6.96525
15607996.1	Rv0856	1G5Y	REA	9.956e-06	-8.66262
15608767.1	polA	1QKN	RAL	9.982e-06	-10.6257
15609672.2	pepQ	3EL1	DR7	9.989e-06	-8.63106
15609197.1	Rv2060	3CWK	REA	9.995e-06	-8.17295
15608115.3	fadE13	2BPX	MK1	9.999e-06	-10.9031
