# Supplementary material for: The Mycobacterium tuberculosis Drugome and Its Polypharmacological Implications
Source: PLoS Comput Biol. 2010 Nov 4;6(11):e1000976. doi: 10.1371/journal.pcbi.1000976 (PMC2973814; doi:10.1371/journal.pcbi.1000976)
Supplement: Table S4 — Information about the solved M.tb structures used in the TB-drugome. This file contains information about the M.tb proteins with solved structure(s) in the RCSB PDB that were used in the the TB-drugome. For each protein, the gene name (if available), gene accession number, protein name and corresponding PDB codes are given. (0.06 MB XLS) [file pcbi.1000976.s009.xls]

## Sheet: Sheet1
Gene name	Accession no.	Protein name	PDB codes
aac	Rv0262c	aminoglycoside 2'-N-acetyltransferase AAC (AAC(2')-IC)	1M44, 1M4D, 1M4G, 1M4I
accD5	Rv3280	propionyl-CoA carboxylase beta chain	2A7S, 2BZR
acpA	Rv0033	acyl carrier protein AcpA	2CGQ
acpP	Rv2244	acyl carrier protein AcpP	1KLP
acpS	Rv2523c	4'-phosphopantetheinyl transferase	3HQJ
adk	Rv0733	adenylate kinase	1P4S, 2CDN
ahpC	Rv2428	alkyl hydroperoxide reductase subunit C	2BMX
ahpD	Rv2429	alkyl hydroperoxide reductase subunit D	1GU9, 1KNC, 1LW1, 1ME5
ahpE	Rv2238c	peroxiredoxin AhpE	1XVW, 1XXU
ald	Rv2780	secreted L-alanine dehydrogenase ALD (40 kDa antigen) (TB43)	2VHV, 2VHW, 2VHX, 2VHY, 2VHZ, 2VOE, 2VOJ
alr	Rv3423c	alanine racemase	1XFC
argB	Rv1654	acetylglutamate kinase	2AP9
argC	Rv1652	N-acetyl-gamma-glutamyl-phosphate reductase	2I3A, 2I3G, 2NQT
argF	Rv1656	ornithine carbamoyltransferase	2I6U, 2P2G
argR	Rv1657	arginine repressor	2ZFZ, 3BUE, 3CAG, 3ERE, 3FHZ
aroA	Rv3227	3-phosphoshikimate 1-carboxyvinyltransferase	2BJB, 2O0B, 2O0D, 2O0E, 2O0X, 2O0Z, 2O15
aroD	Rv2537c	3-dehydroquinate dehydratase	1H05, 1H0R, 1H0S, 2DHQ
aroF	Rv2540c	chorismate synthase	1ZTB, 2G85, 2O11, 2O12, 2QHF
aroG	Rv2178c	3-deoxy-D-arabino-heptulosonate 7-phosphate synthase AroG	2B7O, 2W19, 2W1A
aroK	Rv2539c	shikimate kinase	1L4U, 1L4Y, 1U8A, 1WE2, 1ZYU, 2DFN, 2DFT, 2G1J, 2G1K, 2IYQ, 2IYR, 2IYS, 2IYT, 2IYU, 2IYV, 2IYW, 2IYX, 2IYY, 2IYZ, 3BAF
bioA	Rv1568	adenosylmethionine--8-amino-7-oxononanoate transaminase	3BV0
bioD	Rv1570	dithiobiotin synthetase	3FGN, 3FMF, 3FMI, 3FPA
birA	Rv3279c	biotin--protein ligase	2CGH
blaC	Rv2068c	class A BETA-lactamase BLAC	2GDN, 3CG5, 3DWZ
blaI	Rv1846c	transcriptional repressor blaI	2G9W
bphC	Rv3568c	biphenyl-2,3-diol 1,2-dioxygenase	2ZI8, 2ZYQ
bphD	Rv3569c	2-hydroxy-6-oxo-6-phenylhexa-2,4-dienoate hydrolase BphD	2VF2, 2WUD, 2WUE, 2WUF, 2WUG
bpoC	Rv0554	peroxidase BpoC	3E3A
canA	Rv1284	beta-carbonic anhydrase	1YLK
canB	Rv3588c	beta-carbonic anhydrase	1YM3, 2A5V
cbhK	Rv2202c	carbohydrate kinase CbhK	2PKF, 2PKK, 2PKM, 2PKN
celA1	Rv0062	endo-1,4-beta-glucanase	1UOZ, 1UP0, 1UP2, 1UP3
cfp17	Rv1827	hypothetical protein Rv1827	2KFU
citE	Rv2498c	citrate (Pro-3S)-lyase beta subunit	1U5H, 1U5V, 1Z6K
clpP	Rv2461c	ATP-dependent Clp protease proteolytic subunit	2C8T, 2CBY, 2CE3
cmaA1	Rv3392c	cyclopropane-fatty-acyl-phospholipid synthase 1 CMAA1 (cyclopropane fatty acid synthase) (CFA synthase) (cyclopropane mycolic acid synthase 1)	1KP9, 1KPG, 1KPH
cmaA2	Rv0503c	cyclopropane-fatty-acyl-phospholipid synthase 2 CMAA2 (cyclopropane fatty acid synthase) (CFA synthase) (cyclopropane mycolic acid synthase 2) (mycolic acid trans-cyclopropane synthetase)	1KPI, 3HEM
cmtR	Rv1994c	metal sensor transcriptional regulator cmtR	2JSC
coaA	Rv1092c	pantothenate kinase	2GES, 2GET, 2GEU, 2GEV, 2ZS7, 2ZS8, 2ZS9, 2ZSA, 2ZSB, 2ZSD, 2ZSE, 2ZSF
coaD	Rv2965c	phosphopantetheine adenylyltransferase	1TFU
csoR	Rv0967	copper-sensitive operon repressor csoR	2HH7
cya	Rv1625c	membrane-anchored adenylyl cyclase Cya (ATP pyrophosphate-lyase) (adenylate cyclase)	1YK9
cyp121	Rv2276	cytochrome P450 121 CYP121	1N40, 1N4G, 2IJ5, 2IJ7, 3CXV, 3CXX, 3CXY, 3CXZ, 3CY0, 3CY1, 3G5F, 3G5H
cyp124	Rv2266	cytochrome P450 124 CYP124	2WM4, 2WM5
cyp125	Rv3545c	cytochrome P450 125 CYP125	3IVY, 3IW0, 3IW1, 3IW2
cyp130	Rv1256c	cytochrome P450 130 CYP130	2UUQ, 2UVN, 2WGY, 2WH8, 2WHF
cyp51	Rv0764c	cytochrome P450 sterol 14-alpha demethylase	1E9X, 1EA1, 1H5Z, 1U13, 1X8V, 2BZ9, 2CI0, 2CIB, 2VKU, 2W09, 2W0A, 2W0B
cysA2	Rv0815c	thiosulfate sulfurtransferase CysA2	3HWI
cysA3	Rv3117	thiosulfate sulfurtransferase CysA3	3HWI
cysK1	Rv2334	cysteine synthase A CysK1	2Q3B, 2Q3C, 2Q3D
cysM	Rv1336	cysteine synthase B CysM	3DKI, 3DWG, 3DWI, 3FGP
cysO	Rv1335	sulfur carrier protein cysO	3DWG, 3DWM
dacB2	Rv2911	D-alanyl-D-alanine carboxypeptidase	2BCF
dapA	Rv2753c	dihydrodipicolinate synthase	1XXX
dapB	Rv2773c	dihydrodipicolinate reductase	1C3V, 1P9L, 1YL5, 1YL6, 1YL7
dapC	Rv0858c	N-succinyldiaminopimelate aminotransferase	2O0R
dapD	Rv1201c	tetrahydrodipicolinate N-succinyltransferase dapD	3FSX, 3FSY
dapF	Rv2726c	diaminopimelate epimerase	3FVE
dcd	Rv0321	deoxycytidine triphosphate deaminase	2QLP, 2QXX
def	Rv0429c	peptide deformylase	3E3U
deoD	Rv3307	purine nucleoside phosphorylase	1G2O, 1I80, 1N3I
desA2	Rv1094	acyl-	1ZA0
devB	Rv1445c	6-phosphogluconolactonase	3ICO
devR	Rv3133c	two component transcriptional regulatory protein DevR	1ZLJ, 1ZLK, 3C3W, 3C57
devS	Rv3132c	two component sensor histidine kinase DEVS	2W3D, 2W3E, 2W3F, 2W3G, 2W3H
dfrA	Rv2763c	dihydrofolate reductase DFRA (DHFR) (tetrahydrofolate dehydrogenase)	1DF7, 1DG5, 1DG7, 1DG8, 2CIG
dhaA	Rv2579	haloalkane dehalogenase	2O2H, 2O2I, 2QVB
dipZ	Rv2874	integral membrane C-type cytochrome biogenesis protein DipZ	2HYX
dnaB	Rv0058	replicative DNA helicase	2R5U
dosT	Rv2027c	two component sensor histidine kinase	2VZW
dsbF	Rv1677	lipoprotein DsbF	1ZZO
dut	Rv2697c	deoxyuridine 5'-triphosphate nucleotidohydrolase	1MQ7, 1SIX, 1SJN, 1SLH, 1SM8, 1SMC, 1SNF, 2PY4
dxr	Rv2870c	1-deoxy-D-xylulose 5-phosphate reductoisomerase	2C82, 2JCV, 2JCX, 2JCY, 2JCZ, 2JD0, 2JD1, 2JD2
echA6	Rv0905	enoyl-CoA hydratase	3HE2
echA8	Rv1070c	enoyl-CoA hydratase	3H81
embR	Rv1267c	transcriptional regulatory protein EMBR	2FEZ, 2FF4
ephB	Rv1938	epoxide hydrolase EphB	2E3J, 2ZJF
ephG	Rv2740	epoxide hydrolase EphG	2BNG
esxA	Rv3875	6 kDa early secretory antigenic target ESXA (ESAT-6)	1WA8
esxR	Rv3019c	secreted ESAT-6 like protein ESXR (TB10.3) (ESAT-6 like protein 9)	3H6P
esxS	Rv3020c	Esat-6 like protein esxS	3H6P
ethR	Rv3855	transcriptional regulatory repressor protein (TETR-family) ETHR	1T56, 1U9N, 1U9O, 3G1L, 3G1M, 3G1O
fabD	Rv2243	acyl-carrier-protein S-malonyltransferase	2QC3, 2QJ3
fabG1	Rv1483	3-oxoacyl-(acyl-carrier protein) reductase	1UZL, 1UZM, 1UZN, 2NTN
fabG3	Rv2002	20-beta-hydroxysteroid dehydrogenase	1NFF, 1NFQ, 1NFR
fabH	Rv0533c	3-oxoacyl-(acyl carrier protein) synthase III	1HZP, 1M1M, 1U6E, 1U6S, 2AHB, 2AJ9, 2QNX, 2QNY, 2QNZ, 2QO0, 2QO1, 2QX1
fadD28	Rv2941	acyl-CoA synthetase	3E53
far	Rv0855	fatty-acid-CoA racemase	2G04
fba	Rv0363c	fructose-bisphosphate aldolase	3EKL, 3EKZ, 3ELF
fbpA	Rv3804c	secreted antigen 85-A FBPA (Mycolyl transferase 85A) (fibronectin-binding protein A) (antigen 85 complex A)	1SFR
fbpB	Rv1886c	secreted antigen 85-B fbpB (85B) (antigen 85 complex B) (Mycolyl transferase 85B) (fibronectin-binding protein B) (extracellular alpha-antigen)	1F0N, 1F0P
fbpC	Rv0129c	secreted antigen 85-C FBPC (85C) (antigen 85 complex C) (AG58C) (Mycolyl transferase 85C) (fibronectin-binding protein C)	1DQY, 1DQZ, 1VA5, 3HRH
fbpD	Rv3803c	secreted MPT51/MPB51 antigen protein FBPD (MPT51/MPB51 antigen 85 complex C) (AG58C) (Mycolyl transferase 85C) (fibronectin-binding protein C) (85C)	1R88
fcoT	Rv0098	fatty acyl coA thioesterase type III fcoT	2PFC
fgd1	Rv0407	F420-dependent glucose-6-phosphate dehydrogenase	3B4Y, 3C8N
folB	Rv3607c	dihydroneopterin aldolase FolB	1NBU, 1Z9W
folC	Rv2447c	folylpolyglutamate synthase protein FolC	2VOR, 2VOS
folD	Rv3356c	bifunctional methylenetetrahydrofolate dehydrogenase/methenyltetrahydrofolate cyclohydrolase	2C2X, 2C2Y
folP1	Rv3608c	dihydropteroate synthase	1EYE
folP2	Rv1207	dihydropteroate synthase 2 FolP2	2VP8
fprA	Rv3106	NADPH:adrenodoxin oxidoreductase FPRA (NADPH-ferredoxin reductase)	1LQT, 1LQU, 2C7G
frr	Rv2882c	ribosome recycling factor	1WQF, 1WQG, 1WQH
ftsZ	Rv2150c	cell division protein FtsZ	1RLU, 1RQ2, 1RQ7, 2Q1X, 2Q1Y
furB	Rv2359	ferric uptake regulation protein FURB	2O03
gcvH	Rv1826	glycine cleavage system protein H	3HGB, 3IFT
glbN	Rv1542c	hemoglobin glbN	1IDR, 1RTE, 1S56, 1S61, 2GKM, 2GKN, 2GL3, 2GLN
glbO	Rv2470	globin GlbO	1NGK, 2QRW
glcB	Rv1837c	malate synthase G	1N8I, 1N8W, 2GQ3
glf	Rv3809c	UDP-galactopyranose mutase Glf	1V0J
glmU	Rv1018c	UDP-N-acetylglucosamine pyrophosphorylase glmU	2QKX, 3D8V, 3D98, 3DJ4, 3DK5, 3FOQ
glnA1	Rv2220	glutamine synthetase GLNA1 (glutamine synthase) (GS-I)	1HTO, 1HTQ, 2BVC, 2WGS, 2WHI
glnB	Rv2919c	nitrogen regulatory protein P-II GLNB	3BZQ
gltA1	Rv1131	methylcitrate synthase	3HWK
gltX	Rv2992c	glutamyl-tRNA synthetase	2JA2
glyA	Rv1093	serine hydroxymethyltransferase	3H7F
gmk	Rv1389	guanylate kinase	1S4Q, 1Z8F, 1ZNW, 1ZNX, 1ZNY, 1ZNZ
gpgS	Rv1208	glucosyl-3-phosphoglycerate synthase gpgS	3E25, 3E26
gpm1	Rv0489	phosphoglyceromutase	1RII
gpm2	Rv3214	acid phosphatase	2A6P
groEL	Rv0440	chaperonin GroEL	1SJP
groES	Rv3418c	co-chaperonin GroES	1HX5, 1P3H
gyrA	Rv0006	DNA gyrase subunit A	3ILW
gyrB	Rv0005	DNA gyrase subunit B	2ZJT
hisE	Rv2122c	phosphoribosyl-ATP pyrophosphatase	1Y6X, 3C90
hisG	Rv2121c	ATP phosphoribosyltransferase	1NH7, 1NH8
hrp1	Rv2626c	hypoxic response protein 1	1XKF, 1Y5H
htdZ	Rv0130	3-hydroxyl-thioester dehydratase	2C2I
hupB	Rv2986c	DNA-binding protein HU	3C4I
icl	Rv0467	isocitrate lyase	1F61, 1F8I, 1F8M
ideR	Rv2711	IRON-dependent repressor and activator IDER	1B1B, 1FX7, 1U8R, 2ISY, 2ISZ, 2IT0
inhA	Rv1484	enoyl-(acyl carrier protein) reductase	1BVR, 1ENY, 1ENZ, 1P44, 1P45, 1ZID, 2AQ8, 2AQH, 2AQI, 2AQK, 2B35, 2B36, 2B37, 2H7I, 2H7L, 2H7M, 2H7N, 2H7P, 2H9I, 2IDZ, 2IE0, 2IEB, 2IED, 2NSD, 2NTJ, 2NV6, 2PR2, 3FNE, 3FNF, 3FNG, 3FNH
ino1	Rv0046c	myo-inositol-1-phosphate synthase INO1 (inositol 1-phosphate synthetase) (D-glucose 6-phosphate cycloaldolase) (glucose 6-phosphate cyclase) (glucocycloaldolase)	1GR0
kasA	Rv2245	3-oxoacyl-(acyl carrier protein) synthase II	2WGD, 2WGE, 2WGF, 2WGG
kasB	Rv2246	3-oxoacyl-(acyl carrier protein) synthase II	2GP6
katG	Rv1908c	catalase-peroxidase-peroxynitritase T KATG	1SJ2, 2CCA, 2CCD
kshA	Rv3526	ketosteroid-9-alpha-hydroxylase	2ZYL
lat	Rv3290c	L-lysine aminotransferase	2CIN, 2CJD, 2CJG, 2CJH, 2JJE, 2JJF, 2JJG, 2JJH
leuA	Rv3710	2-isopropylmalate synthase	1SR9, 3FIG
leuB	Rv2995c	3-isopropylmalate dehydrogenase	1W0D, 2G4O
ligA	Rv3014c	NAD-dependent DNA ligase LigA	1ZAU
ligD	Rv0938	ATP-dependent DNA ligase	1VS0, 2IRU, 2IRX, 2IRY, 2R9L
lipB	Rv2217	lipoyltransferase	1W66
lipJ	Rv1900c	lignin peroxidase LIPJ	1YBT, 1YBU
lpd	Rv0462	dihydrolipoamide dehydrogenase	2A8X
lpdA	Rv3303c	flavoprotein disulfide reductase	1XDI
lppA	Rv2543	lipoprotein LppA	2V7S
lppX	Rv2945c	lipoprotein LppX	2BYO
lrpA	Rv3291c	AsnC family transcriptional regulator	2IVM, 2QZ8, 2VBW, 2VBX, 2VBY, 2VBZ, 2VC0, 2VC1
lysA	Rv1293	diaminopimelate decarboxylase LysA	1HKV, 1HKW, 2O0T
mapB	Rv2861c	methionine aminopeptidase	1Y1N, 1YJ3
mbtH	Rv2377c	putative protein MbtH	2KHR
mbtI	Rv2386c	salicylate synthase MbtI	2G5F, 2I6Y
mbtK	Rv1347c	lysine N-acetyltransferase mbtK	1YK3
mcr	Rv1143	alpha-methylacyl-CoA racemase	1X74, 2GCE, 2GCI, 2GD0, 2GD2, 2GD6
menB	Rv0548c	naphthoate synthase	1Q51, 1Q52, 1RJM, 1RJN
menG	Rv3853	ribonuclease activity regulator protein RraA	1NXJ
mmaA2	Rv0644c	methoxy mycolic acid synthase	1TPY
mmaA4	Rv0642c	methoxy mycolic acid synthase	2FK7, 2FK8, 3HA3, 3HA5, 3HA7
mog	Rv0865	molybdopterin biosynthesis Mog protein	2G4R
mpa	Rv2115c	proteasome ATPase mpa	3FP9
mpt53	Rv2878c	soluble secreted antigen MPT53 precursor	1LU4
mpt63	Rv1926c	immunogenic protein MPT63 (antigen MPT63/MPB63) (16 kDa immunoprotective extracellular protein)	1LMI
mpt64	Rv1980c	immunogenic protein MPT64 (antigen MPT64/MPB64)	2HHI
mpt70	Rv2875	major secreted immunogenic protein MPT70	1NYO
mscL	Rv0985c	large-conductance mechanosensitive channel	2OAR
mshB	Rv1170	N-Acetyl-1-D-myo-Inosityl-2-amino-2-deoxy-alpha- D-glucopyranoside deacetylase mshB (GlcNAc-Ins deacetylase)	1Q74, 1Q7T
mshD	Rv0819	GCN5-related N-acetyltransferase	1OZP, 1P0H, 2C27
msrA	Rv0137c	methionine sulfoxide reductase A	1NWA
mtrA	Rv3246c	two component sensory transduction transcriptional regulatory protein MTRA	2GWR
nadC	Rv1596	nicotinate-nucleotide pyrophosphorylase	1QPN, 1QPO, 1QPQ, 1QPR
nadE	Rv2438c	NAD synthetase	3DLA
narL	Rv0844c	nitrate/nitrite response transcriptional regulatory protein NarL	3EUL
ndk	Rv2445c	nucleoside diphosphate kinase	1K44
nirA	Rv2391	ferredoxin-dependent nitrite reductase NIRA	1ZJ8, 1ZJ9
nrdB	Rv0233	ribonucleotide-diphosphate reductase subunit beta	3EE4
nrdF2	Rv3048c	ribonucleotide-diphosphate reductase subunit beta	1UZR
nusA	Rv2841c	transcription elongation factor NusA	1K0R, 2ASB, 2ATW
nusB	Rv2533c	transcription antitermination protein NusB	1EYV
panB	Rv2225	3-methyl-2-oxobutanoate hydroxymethyltransferase	1OY0
panC	Rv3602c	pantoate--beta-alanine ligase	1MOP, 1N2B, 1N2E, 1N2G, 1N2H, 1N2I, 1N2J, 1N2O, 2A7X, 2A84, 2A86, 2A88, 3COV, 3COW, 3COY, 3COZ, 3IMC, 3IME, 3IMG, 3ISJ, 3IUB, 3IUE, 3IVC, 3IVG, 3IVX
papA5	Rv2939	acyltransferase PapA5	1Q9J
pcaA	Rv0470c	mycolic acid synthase pcaA (cyclopropane synthase)	1L1E
pdxH	Rv2607	pyridoxamine 5'-phosphate oxidase	2A2J
PE25	Rv2431c	PE family protein	2G38
pepD	Rv0983	serine protease PepD	1Y8T, 2Z9I
pgi	Rv0946c	glucose-6-phosphate isomerase	2WU8
phoP	Rv0757	two component system response transcriptional positive regulator PHOP	2PMU
pknB	Rv0014c	transmembrane serine/threonine-protein kinase B PKNB (protein kinase B) (STPK B)	1MRU, 1O6Y, 2FUM, 3F61, 3F69
pknD	Rv0931c	transmembrane serine/threonine-protein kinase D PKND (protein kinase D) (STPK D)	1RWI, 1RWL
pknE	Rv1743	transmembrane serine/threonine-protein kinase E	2H34
pknG	Rv0410c	serine/threonine-protein kinase PKNG (protein kinase G) (STPK G)	2PZI
ppa	Rv3628	inorganic pyrophosphatase	1SXV, 1WCF, 2UXS
PPE41	Rv2430c	PPE family protein	2G38
ppiA	Rv0009	iron-regulated peptidyl-prolyl cis-trans isomerase A	1W74
ppnK	Rv1695	inorganic polyphosphate/ATP-NAD kinase	1U0R, 1U0T, 1Y3H, 1Y3I
ppp	Rv0018c	serine/threonine phosphatase	1TXO, 2CM1
ppsC	Rv2933	phenolpthiocerol synthesis type-I polyketide synthase PPSC	1PQW
prcA	Rv2109c	proteasome (alpha subunit) PrcA	2FHG, 2FHH, 3H6F, 3H6I, 3HF9, 3HFA
prcB	Rv2110c	proteasome (beta subunit) PrcB	2FHG, 2FHH, 2JAY, 3H6F, 3H6I, 3HF9, 3HFA
prrA	Rv0903c	two component response transcriptional regulatory protein PRRA	1YS6, 1YS7
prrB	Rv0902c	two component sensor histidine kinase PRRB	1YS3, 1YSR
pstS1	Rv0934	periplasmic phosphate-binding lipoprotein PSTS1 (PBP-1) (PSTS1)	1PC3
ptbB	Rv0153c	phosphotyrosine protein phosphatase PTPB (protein-tyrosine-phosphatase) (PTPase)	1YWF, 2OZ5
pth	Rv1014c	peptidyl-tRNA hydrolase	2JRC, 2Z2I, 2Z2J, 2Z2K
ptpA	Rv2234	phosphotyrosine protein phosphatase PTPA (protein-tyrosine-phosphatase) (PTPase) (LMW phosphatase)	1U2P, 1U2Q
purN	Rv0956	phosphoribosylglycinamide formyltransferase	3DA8, 3DCJ
pyrR	Rv1379	pyrimidine regulatory protein PyrR	1W30
recA	Rv2737c	recombinase A	1G18, 1G19, 1MO3, 1MO4, 1MO5, 1MO6, 2IMZ, 2IN0, 2IN8, 2IN9, 3IFJ, 3IGD
regX3	Rv0491	two component sensory transduction protein RegX3	2OQR
relB2	Rv2865	antitoxin relB2	3G5O
relB3	Rv3357	antitoxin relB3	3CTO, 3D55
relE2	Rv2866	toxin relE2	3G5O
ribH	Rv1416	riboflavin synthase subunit beta	1W19, 1W29, 2C92, 2C94, 2C97, 2C9B, 2C9D, 2VI5
rmlC	Rv3465	dTDP-4-dehydrorhamnose 3,5-epimerase RmlC	1PM7, 1UPI, 2IXC
rnc	Rv2925c	ribonuclease III	2A11
rpfB	Rv1009	resuscitation-promoting factor rpfB	1XSF, 3EO5
rph	Rv1340	ribonuclease PH	3B4T
rpiB	Rv2465c	ribose-5-phosphate isomerase B	1USL, 2BES, 2BET, 2VVO, 2VVP, 2VVQ
rubB	Rv3250c	rubredoxin RubB	2KN9
ruvA	Rv2593c	Holliday junction DNA helicase motor protein	2H5X, 2ZTC, 2ZTD, 2ZTE
Rv0216	Rv0216	double hotdog hydratase	2BI0
Rv0223c	Rv0223c	aldehyde dehydrogenase	3B4W
Rv0390	Rv0390	hypothetical protein Rv0390	2FSX
Rv0760c	Rv0760c	hypothetical protein Rv0760c	2A15, 2Z76, 2Z77, 2Z7A
Rv0793	Rv0793	monooxygenase	1Y0H
Rv0802c	Rv0802c	succinyltransferase	2VZY, 2VZZ
Rv0805	Rv0805	class III cyclic nucleotide phosphodiesterase	2HY1, 2HYO, 2HYP, 3IB7, 3IB8
Rv0813c	Rv0813c	hypothetical protein Rv0813c	2FWV
Rv0948c	Rv0948c	chorismate mutase	2QBV, 2VKL, 2W19, 2W1A
Rv1086	Rv1086	short (C15) chain Z-isoprenyl diphosphate synthase (Z-FPP synthase) (Z-farnesyl diphosphate synthase) (Z-FPP synthetase) (Z-farnesyl diphosphate synthetase) (geranyltranstransferase) (farnesyl pyrophosphate synthetase)	2VFW, 2VG0, 2VG1
Rv1155	Rv1155	pyridoxamine 5'-phosphate oxidase	1W9A, 1XXO, 1Y30, 2AQ6
Rv1264	Rv1264	adenylyl cyclase	1Y10, 1Y11, 2EV1, 2EV2, 2EV3, 2EV4
Rv1314c	Rv1314c	hypothetical protein Rv1314c	2G2D
Rv1372	Rv1372	hypothetical protein Rv1372	1TED, 1TEE
Rv1404	Rv1404	transcriptional regulatory protein	2NYX
Rv1626	Rv1626	two-component system transcriptional regulator	1S8N, 1SD5
Rv1700	Rv1700	nudix hydrolase	1MK1, 1MP2, 1MQE, 1MQW, 1MR2
Rv1761c	Rv1761c	hypothetical protein Rv1761c	2K3M
Rv1825	Rv1825	hypothetical protein Rv1825	3GMG
Rv1873	Rv1873	hypothetical protein Rv1873	2JEK
Rv1885c	Rv1885c	chorismate mutase	2AO2, 2F6L, 2FP1, 2FP2
Rv1941	Rv1941	short-chain type dehydrogenase/reductase	3GVC
Rv2074	Rv2074	pyridoxamine 5'-phosphate oxidase	2ASF
Rv2118c	Rv2118c	RNA methyltransferase	1I9G
Rv2175c	Rv2175c	putative regulatory protein	2KFS
Rv2302	Rv2302	hypothetical protein Rv2302	2A7Y
Rv2632c	Rv2632c	hypothetical protein Rv2632c	2FGG
Rv2714	Rv2714	hypothetical protein Rv2714	2WAM
Rv2717c	Rv2717c	hypothetical protein Rv2717c	2FR2
Rv2827c	Rv2827c	hypothetical protein Rv2827c	1ZEL
Rv2844	Rv2844	hypothetical protein Rv2844	2IB0
Rv2991	Rv2991	hypothetical protein Rv2991	1RFE
Rv3361c	Rv3361c	hypothetical protein Rv3361c	2BM4, 2BM5, 2BM6, 2BM7
Rv3472	Rv3472	hypothetical protein Rv3472	2CHC
Rv3529c	Rv3529c	hypothetical protein Rv3529c	2ZQ5
Rv3676	Rv3676	CRP/FNR family transcriptional regulator	3D0S, 3I54, 3I59
Rv3778c	Rv3778c	aminotransferase	3CAI
sahH	Rv3248c	S-adenosyl-L-homocysteine hydrolase	2ZIZ, 2ZJ0, 2ZJ1, 3CE6, 3DHY
scpB	Rv1710	segregation and condensation protein scpB	2Z99
secA1	Rv3240c	preprotein translocase subunit SecA	1NKT, 1NL3
serA1	Rv2996c	D-3-phosphoglycerate dehydrogenase	1YGY, 3DC2, 3DDN
serC	Rv0884c	phosphoserine aminotransferase	2FYF
sigC	Rv2069	RNA polymerase sigma factor SigC	2O7G, 2O8X
sodA	Rv3846	superoxide dismutase	1GN2, 1GN3, 1GN4, 1GN6, 1IDS
sodC	Rv0432	periplasmic superoxide dismutase	1PZS
ssb	Rv0054	single-strand DNA-binding protein	1UE1, 1UE5, 1UE6, 1UE7
sseA	Rv3283	thiosulfate sulfurtransferase SseA	3HZU
suhB	Rv2701c	extragenic suppressor protein SuhB	2Q74
TB15.3	Rv1636	hypothetical protein Rv1636	1TQ8
TB31.7	Rv2623	universal stress protein	2JAX, 3CIS
thrC	Rv1295	threonine synthase	2D1F
thyX	Rv2754c	FAD-dependent thymidylate synthase	2AF6, 2GQ2, 3GWC, 3HZG
tmk	Rv3247c	thymidylate kinase	1G3U, 1GSI, 1GTV, 1MRN, 1MRS, 1N5I, 1N5J, 1N5K, 1N5L, 1W2G, 1W2H
tpiA	Rv1438	triosephosphate isomerase	3GVG
tpx	Rv1932	thiol peroxidase	1XVQ, 1Y25
trpB	Rv1612	tryptophan synthase subunit beta	2O2E, 2O2J
trpD	Rv2192c	anthranilate phosphoribosyltransferase	1ZVW, 2BPQ
truB	Rv2793c	tRNA pseudouridine synthase B	1SGV
trxB2	Rv3913	thioredoxin reductase TRXB2	2A87
trxC	Rv3914	thioredoxin trxC (TRX) (MPT46)	2I1U,
tyrS	Rv1689	tyrosyl-tRNA synthetase	2JAN
ung	Rv2976c	uracil-DNA glycosylase	2ZHX
uppS	Rv2361c	long (C50) chain Z-isoprenyl diphosphate synthase (Z-decaprenyl diphosphate synthase)	2VG2, 2VG3, 2VG4
ureA	Rv1848	urease subunit gamma	2FVH
vapB2	Rv0300	antitoxin vapB2	3H87
vapB5	Rv0626	antitoxin vapB5	3DBO
vapC2	Rv0301	toxin vapC2	3H87
vapC5	Rv0627	toxin vapC5	3DBO
