# Supplementary material for: The Mycobacterium tuberculosis Drugome and Its Polypharmacological Implications
Source: PLoS Comput Biol. 2010 Nov 4;6(11):e1000976. doi: 10.1371/journal.pcbi.1000976 (PMC2973814; doi:10.1371/journal.pcbi.1000976)
Supplement: Table S5 — Information about the M.tb homology models used in the TB-drugome. This file contains information about the reliable homology models of M.tb proteins from ModBase that were used in TB-drugome. For each homology model, the ModBase model code is given, as well as the gene accession number, gene name and description of the M.tb protein. N.B. Further information about each homology model can be found on the ModBase website. (0.24 MB XLS) [file pcbi.1000976.s010.xls]

## Sheet: Sheet1
ModBase model code	Accession no.	Gene name	Description
1.56071e+07	Rv0001	dnaA	chromosomal replication initiation protein
1.56071e+07	Rv0002	dnaN	DNA polymerase III subunit beta
1.56071e+07	Rv0005	gyrB	DNA gyrase subunit B
1.56071e+07	Rv0006	gyrA	DNA gyrase subunit A
1.56072e+07	Rv0009	ppiA	iron-regulated peptidyl-prolyl cis-trans isomerase A
1.56072e+07	Rv0014c	pknB	transmembrane serine/threonine-protein kinase B PKNB (protein kinase B) (STPK B)
1.56072e+07	Rv0015c	pknA	transmembrane serine/threonine-protein kinase A PKNA (protein kinase A) (STPK A)
1.56072e+07	Rv0018c	ppp	serine/threonine phosphatase
1.56072e+07	Rv0021c	-	hypothetical protein Rv0021c
1.56072e+07	Rv0033	acpA	acyl carrier protein AcpA
1.56072e+07	Rv0034	-	hypothetical protein Rv0034
1.56072e+07	Rv0037c	-	integral membrane protein
1.56072e+07	Rv0038	-	hypothetical protein Rv0038
1.56072e+07	Rv0042c	-	MarR family transcriptional regulator
1.56072e+07	Rv0044c	-	oxidoreductase
1.56072e+07	Rv0045c	-	hydrolase
1.56072e+07	Rv0046c	ino1	myo-inositol-1-phosphate synthase INO1 (inositol 1-phosphate synthetase) (D-glucose 6-phosphate cycloaldolase) (glucose 6-phosphate cyclase) (glucocycloaldolase)
1.56072e+07	Rv0047c	-	hypothetical protein Rv0047c
1.56072e+07	Rv0052	-	hypothetical protein Rv0052
1.56072e+07	Rv0053	rpsF	30S ribosomal protein S6
1.56072e+07	Rv0054	ssb	single-strand DNA-binding protein
1.56072e+07	Rv0056	rplI	50S ribosomal protein L9
1.56072e+07	Rv0063	-	oxidoreductase
1.56072e+07	Rv0065	vapC1	possible toxin vapc1
1.56072e+07	Rv0066c	icd2	isocitrate dehydrogenase
1.56072e+07	Rv0067c	-	TetR family transcriptional regulator
1.56072e+07	Rv0068	-	short chain dehydrogenase
1.56072e+07	Rv0070c	glyA	serine hydroxymethyltransferase
1.56072e+07	Rv0073	-	glutamine-transport ATP-binding protein ABC transporter
1.56072e+07	Rv0075	-	aminotransferase
1.56072e+07	Rv0077c	-	oxidoreductase
1.56072e+07	Rv0078	-	transcriptional regulatory protein
1.56072e+07	Rv0081	-	transcriptional regulatory protein
1.56072e+07	Rv0082	-	oxidoreductase
1.56072e+07	Rv0089	-	methyltransferase/methylase
1.56072e+07	Rv0091	mtn	bifunctional 5'-methylthioadenosine nucleosidase/S-adenosylhomocysteine nucleosidase
1.56072e+07	Rv0097	-	oxidoreductase
1.56072e+07	Rv0099	fadD10	acyl-CoA synthetase
1.56072e+07	Rv0100	-	hypothetical protein Rv0100
1.56073e+07	Rv0112	gca	GDP-mannose 4,6-dehydratase
1.56073e+07	Rv0113	gmhA	sedoheptulose-7-phosphate isomerase
1.56073e+07	Rv0117	oxyS	oxidative stress response regulatory protein OXYS
1.56073e+07	Rv0118c	oxcA	putative oxalyl-CoA decarboxylase
1.56073e+07	Rv0119	fadD7	acyl-CoA synthetase
1.56073e+07	Rv0120c	fusA2	elongation factor G
1.56073e+07	Rv0121c	-	hypothetical protein Rv0121c
1.56073e+07	Rv0125	pepA	serine protease PepA
1.56073e+07	Rv0126	treS	trehalose synthase TRES
1.56073e+07	Rv0130	htdZ	probable 3-hydroxyl-thioester dehydratase
1.56073e+07	Rv0131c	fadE1	acyl-CoA dehydrogenase FADE1
1.56073e+07	Rv0132c	fgd2	putative f420-dependent glucose-6-phosphate dehydrogenase Fgd2
1.56073e+07	Rv0133	-	acetyltransferase
1.56073e+07	Rv0134	ephF	epoxide hydrolase EphF
1.56073e+07	Rv0135c	-	transcriptional regulatory protein
1.56073e+07	Rv0136	cyp138	cytochrome P450 138
1.56073e+07	Rv0137c	msrA	methionine sulfoxide reductase A
1.56073e+07	Rv0139	-	oxidoreductase
1.56073e+07	Rv0141c	-	hypothetical protein Rv0141c
1.56073e+07	Rv0143c	-	transmembrane protein
1.56073e+07	Rv0147	-	aldehyde dehydrogenase
1.56073e+07	Rv0148	-	short-chain type dehydrogenase/reductase
1.56073e+07	Rv0149	-	quinone oxidoreductase
1.56073e+07	Rv0153c	ptbB	phosphotyrosine protein phosphatase PTPB (protein-tyrosine-phosphatase) (PTPase)
1.56073e+07	Rv0154c	fadE2	acyl-CoA dehydrogenase FADE2
1.56073e+07	Rv0155	pntAa	NAD(P) transhydrogenase subunit alpha
1.56073e+07	Rv0157	pntB	NAD(P) transhydrogenase subunit beta
1.56073e+07	Rv0158	-	TetR family transcriptional regulator
1.56073e+07	Rv0161	-	oxidoreductase
1.56073e+07	Rv0163	-	hypothetical protein Rv0163
1.56073e+07	Rv0166	fadD5	acyl-CoA synthetase
1.56073e+07	Rv0181c	-	hypothetical protein Rv0181c
1.56073e+07	Rv0187	-	O-methyltransferase
1.56073e+07	Rv0191	-	integral membrane protein
1.56073e+07	Rv0195	-	two component transcriptional regulatory protein
1.56073e+07	Rv0196	-	transcriptional regulatory protein
1.56073e+07	Rv0197	-	oxidoreductase
1.56073e+07	Rv0198c	-	zinc metalloprotease
1.56073e+07	Rv0208c	trmB	tRNA (guanine-N(7))-methyltransferase
1.56074e+07	Rv0211	pckA	phosphoenolpyruvate carboxykinase
1.56074e+07	Rv0212c	nadR	transcriptional regulatory protein NadR
1.56074e+07	Rv0214	fadD4	acyl-CoA synthetase
1.56074e+07	Rv0215c	fadE3	acyl-CoA dehydrogenase FADE3
1.56074e+07	Rv0216	-	hypothetical protein Rv0216
1.56074e+07	Rv0217c	lipW	esterase LipW
1.56074e+07	Rv0220	lipC	esterase LipC
1.56074e+07	Rv0222	echA1	enoyl-CoA hydratase
1.56074e+07	Rv0223c	-	aldehyde dehydrogenase
1.56074e+07	Rv0224c	-	methyltransferase (methylase)
1.56074e+07	Rv0225	-	hypothetical protein Rv0225
1.56074e+07	Rv0230c	php	phosphotriesterase
1.56074e+07	Rv0232	-	TetR/ACRR family transcriptional regulator
1.56074e+07	Rv0233	nrdB	ribonucleotide-diphosphate reductase subunit beta
1.56074e+07	Rv0238	-	TetR family transcriptional regulator
1.56074e+07	Rv0241c	htdX	probable 3-hydroxyacyl-thioester dehydratase htdx
1.56074e+07	Rv0242c	fabG	3-ketoacyl-(acyl-carrier-protein) reductase
1.56074e+07	Rv0243	fadA2	acetyl-CoA acetyltransferase
1.56074e+07	Rv0245	-	oxidoreductase
1.56074e+07	Rv0246	-	integral membrane protein
1.56074e+07	Rv0247c	-	fumarate reductase iron-sulfur subunit
1.56074e+07	Rv0248c	sdhA	succinate dehydrogenase flavoprotein subunit
1.56074e+07	Rv0251c	hsp	heat shock protein hsp (heat-stress-induced ribosome-binding protein A)
1.56074e+07	Rv0253	nirD	nitrite reductase
1.56074e+07	Rv0254c	cobU	bifunctional cobinamide kinase/cobinamide phosphate guanylyltransferase
1.56074e+07	Rv0258c	-	hypothetical protein Rv0258c
1.56074e+07	Rv0260c	-	bifunctional uroporphyrinogen-III synthetase/response regulator domain-containing protein
1.56074e+07	Rv0262c	aac	aminoglycoside 2'-N-acetyltransferase AAC (AAC(2')-IC)
1.56074e+07	Rv0270	fadD2	acyl-CoA synthetase
1.56074e+07	Rv0273c	-	transcriptional regulatory protein
1.56074e+07	Rv0277c	-	hypothetical protein Rv0277c
1.56074e+07	Rv0287	esxG	hypothetical protein Rv0287
1.56074e+07	Rv0288	esxH	low molecular weight protein antigen 7 ESXH (10 kDa antigen) (CFP-7) (protein TB10.4)
1.56074e+07	Rv0294	tam	trans-aconitate methyltransferase tam
1.56074e+07	Rv0295c	-	hypothetical protein Rv0295c
1.56074e+07	Rv0301	vapC2	possible toxin vapc2
1.56074e+07	Rv0302	-	TetR/ACRR family transcriptional regulator
1.56074e+07	Rv0303	-	dehydrogenase/reductase
1.56074e+07	Rv0306	-	putative oxidoreductase
1.56075e+07	Rv0317c	glpQ2	glycerophosphoryl diester phosphodiesterase
1.56075e+07	Rv0319	pcp	pyrrolidone-carboxylate peptidase
1.56075e+07	Rv0321	dcd	deoxycytidine triphosphate deaminase
1.56075e+07	Rv0322	udgA	UDP-glucose 6-dehydrogenase UdgA
1.56075e+07	Rv0323c	-	hypothetical protein Rv0323c
1.56075e+07	Rv0327c	cyp135A1	cytochrome P450 135A1
1.56075e+07	Rv0328	-	TetR/AcrR family transcriptional regulator
1.56075e+07	Rv0329c	-	hypothetical protein Rv0329c
1.56075e+07	Rv0331	-	dehydrogenase/reductase
1.56075e+07	Rv0333	-	hypothetical protein Rv0333
1.56075e+07	Rv0334	rmlA	alpha-D-glucose-1-phosphate thymidylyltransferase RmlA
1.56075e+07	Rv0337c	aspC	aminotransferase AlaT
1.56075e+07	Rv0345	-	hypothetical protein Rv0345
1.56075e+07	Rv0350	dnaK	molecular chaperone DnaK
1.56075e+07	Rv0353	hspR	HEAT shock protein transcriptional repressor HspR
1.56075e+07	Rv0357c	purA	adenylosuccinate synthetase
1.56075e+07	Rv0363c	fba	fructose-bisphosphate aldolase
1.56075e+07	Rv0366c	-	hypothetical protein Rv0366c
1.56075e+07	Rv0371c	-	hypothetical protein Rv0371c
1.56075e+07	Rv0373c	-	carbon monoxyde dehydrogenase large subunit
1.56075e+07	Rv0374c	-	carbon monoxyde dehydrogenase small subunit
1.56075e+07	Rv0375c	-	carbon monoxyde dehydrogenase medium subunit
1.56075e+07	Rv0377	-	LysR family transcriptional regulator
1.56075e+07	Rv0380c	-	RNA methyltransferase
1.56075e+07	Rv0384c	clpB	endopeptidase ATP binding protein
1.56075e+07	Rv0385	-	hypothetical protein Rv0385
1.56075e+07	Rv0389	purT	phosphoribosylglycinamide formyltransferase 2
1.56075e+07	Rv0390	-	hypothetical protein Rv0390
1.56075e+07	Rv0391	metZ	O-succinylhomoserine sulfhydrylase
1.56075e+07	Rv0399c	lpqK	lipoprotein LpqK
1.56075e+07	Rv0400c	fadE7	acyl-CoA dehydrogenase FADE7
1.56075e+07	Rv0404	fadD30	acyl-CoA synthetase
1.56075e+07	Rv0405	pks6	membrane bound polyketide synthase
1.56075e+07	Rv0406c	-	beta lactamase like protein
1.56075e+07	Rv0407	fgd1	F420-dependent glucose-6-phosphate dehydrogenase
1.56075e+07	Rv0408	pta	phosphate acetyltransferase
1.56076e+07	Rv0409	ackA	acetate kinase
1.56076e+07	Rv0411c	glnH	glutamine-binding lipoprotein
1.56076e+07	Rv0414c	thiE	thiamine-phosphate pyrophosphorylase
1.56076e+07	Rv0415	thiO	thiamine biosynthesis oxidoreductase ThiO
1.56076e+07	Rv0416	thiS	sulfur carrier protein ThiS
1.56076e+07	Rv0417	thiG	thiazole synthase
1.56076e+07	Rv0421c	-	hypothetical protein Rv0421c
1.56076e+07	Rv0422c	thiD	phosphomethylpyrimidine kinase
1.56076e+07	Rv0427c	xthA	exodeoxyribonuclease III protein
1.56076e+07	Rv0429c	def	peptide deformylase
1.56076e+07	Rv0432	sodC	periplasmic superoxide dismutase
1.56076e+07	Rv0433	-	carboxylate-amine ligase
1.56076e+07	Rv0434	-	hypothetical protein Rv0434
1.56076e+07	Rv0435c	-	putative ATPase
1.56076e+07	Rv0439c	-	short chain dehydrogenase
1.56076e+07	Rv0440	groEL	chaperonin GroEL
1.56076e+07	Rv0445c	sigK	RNA polymerase sigma factor SigK
1.56076e+07	Rv0447c	ufaA1	cyclopropane-fatty-acyl-phospholipid synthase
1.56076e+07	Rv0452	-	transcriptional regulatory protein
1.56076e+07	Rv0456c	echA2	enoyl-CoA hydratase
1.56076e+07	Rv0457c	-	peptidase
1.56076e+07	Rv0458	-	aldehyde dehydrogenase
1.56076e+07	Rv0462	lpd	dihydrolipoamide dehydrogenase
1.56076e+07	Rv0468	fadB2	3-hydroxybutyryl-CoA dehydrogenase
1.56076e+07	Rv0472c	-	TetR family transcriptional regulator
1.56076e+07	Rv0474	-	transcriptional regulatory protein
1.56076e+07	Rv0478	deoC	deoxyribose-phosphate aldolase
1.56076e+07	Rv0482	murB	UDP-N-acetylenolpyruvoylglucosamine reductase
1.56076e+07	Rv0484c	-	short-chain type oxidoreductase
1.56076e+07	Rv0485	-	transcriptional regulatory protein
1.56076e+07	Rv0486	mshA	glycosyltransferase msha
1.56076e+07	Rv0491	regX3	two component sensory transduction protein RegX3
1.56076e+07	Rv0496	-	hypothetical protein Rv0496
1.56076e+07	Rv0498	-	hypothetical protein Rv0498
1.56076e+07	Rv0500	proC	pyrroline-5-carboxylate reductase
1.56076e+07	Rv0503c	cmaA2	cyclopropane-fatty-acyl-phospholipid synthase 2 CMAA2 (cyclopropane fatty acid synthase) (CFA synthase) (cyclopropane mycolic acid synthase 2) (mycolic acid trans-cyclopropane synthetase)
1.56076e+07	Rv0504c	-	hypothetical protein Rv0504c
1.56076e+07	Rv0508	-	hypothetical protein Rv0508
1.56077e+07	Rv0509	hemA	glutamyl-tRNA reductase
1.56077e+07	Rv0510	hemC	porphobilinogen deaminase
1.56077e+07	Rv0512	hemB	delta-aminolevulinic acid dehydratase
1.56077e+07	Rv0516c	-	hypothetical protein Rv0516c
1.56077e+07	Rv0518	-	hypothetical protein Rv0518
1.56077e+07	Rv0520	-	hypothetical protein Rv0520
1.56077e+07	Rv0524	hemL	glutamate-1-semialdehyde aminotransferase
1.56077e+07	Rv0525	-	hypothetical protein Rv0525
1.56077e+07	Rv0526	-	thioredoxin protein
1.56077e+07	Rv0533c	fabH	3-oxoacyl-(acyl carrier protein) synthase III
1.56077e+07	Rv0535	pnp	5'-methylthioadenosine phosphorylase
1.56077e+07	Rv0542c	menE	O-succinylbenzoic acid--CoA ligase
1.56077e+07	Rv0546c	-	hypothetical protein Rv0546c
1.56077e+07	Rv0547c	-	short chain dehydrogenase
1.56077e+07	Rv0548c	menB	naphthoate synthase
1.56077e+07	Rv0549c	vapC3	possible toxin vapc3
1.56077e+07	Rv0551c	fadD8	acyl-CoA synthetase
1.56077e+07	Rv0553	menC	O-succinylbenzoate synthase
1.56077e+07	Rv0554	bpoC	peroxidase BpoC
1.56077e+07	Rv0555	menD	2-succinyl-6-hydroxy-2,4-cyclohexadiene-1-carboxylic acid synthase/2-oxoglutarate decarboxylase
1.56077e+07	Rv0557	pimB	mannosyltransferase PIMB
1.56077e+07	Rv0561c	-	oxidoreductase
1.56077e+07	Rv0562	grcC1	polyprenyl-diphosphate synthase
1.56077e+07	Rv0564c	gpsA	NAD(P)H-dependent glycerol-3-phosphate dehydrogenase
1.56077e+07	Rv0565c	-	monooxygenase
1.56077e+07	Rv0566c	-	nucleotide-binding protein
1.56077e+07	Rv0567	-	methyltransferase/methylase
1.56077e+07	Rv0568	cyp135B1	cytochrome P450 135B1
1.56077e+07	Rv0569	-	hypothetical protein Rv0569
1.56077e+07	Rv0570	nrdZ	ribonucleoside-diphosphate reductase large subunit NrdZ
1.56077e+07	Rv0571c	-	hypothetical protein Rv0571c
1.56077e+07	Rv0573c	pncB2	nicotinic acid phosphoribosyltransferase pncb2
1.56077e+07	Rv0575c	-	hypothetical protein Rv0575c
1.56077e+07	Rv0577	TB27.3	hypothetical protein Rv0577
1.56077e+07	Rv0582	-	hypothetical protein Rv0582
1.56077e+07	Rv0586	mce2R	probable transcriptional regulatory protein mce2r (gntr-family)
1.56077e+07	Rv0595c	vapC4	possible toxin vapc4
1.56077e+07	Rv0598c	-	hypothetical protein Rv0598c
1.56077e+07	Rv0602c	tcrA	two component DNA binding transcriptional regulatory protein TCRA
1.56077e+07	Rv0609	-	hypothetical protein Rv0609
1.56078e+07	Rv0617	-	hypothetical protein Rv0617
1.56078e+07	Rv0620	galK	galactokinase
1.56078e+07	Rv0624	-	hypothetical protein Rv0624
1.56078e+07	Rv0627	vapC5	possible toxin vapc5
1.56078e+07	Rv0629c	recD	exonuclease V alpha chain
1.56078e+07	Rv0630c	recB	exonuclease V beta chain
1.56078e+07	Rv0631c	recC	exonuclease V gamma chain
1.56078e+07	Rv0632c	echA3	enoyl-CoA hydratase
1.56078e+07	Rv0634c	-	glyoxalase II
1.56078e+07	Rv0635	hadA	(3r)-hydroxyacyl-acp dehydratase subunit hada
1.56078e+07	Rv0636	hadB	(3r)-hydroxyacyl-acp dehydratase subunit hadb
1.56078e+07	Rv0637	hadC	(3r)-hydroxyacyl-acp dehydratase subunit hadc
1.56078e+07	Rv0640	rplK	50S ribosomal protein L11
1.56078e+07	Rv0641	rplA	50S ribosomal protein L1
1.56078e+07	Rv0642c	mmaA4	methoxy mycolic acid synthase
1.56078e+07	Rv0643c	mmaA3	methoxy mycolic acid synthase
1.56078e+07	Rv0644c	mmaA2	methoxy mycolic acid synthase
1.56078e+07	Rv0645c	mmaA1	methoxy mycolic acid synthase
1.56078e+07	Rv0646c	lipG	lipase/esterase LipG
1.56078e+07	Rv0650	-	sugar kinase
1.56078e+07	Rv0651	rplJ	50S ribosomal protein L10
1.56078e+07	Rv0652	rplL	50S ribosomal protein L7/L12
1.56078e+07	Rv0653c	-	TetR family transcriptional regulator
1.56078e+07	Rv0654	-	dioxygenase
1.56078e+07	Rv0655	mkl	ribonucleotide ABC transporter ATP-binding protein
1.56078e+07	Rv0659c	mazF2	function unknown
1.56078e+07	Rv0665	vapC8	possible toxin vapc8
1.56078e+07	Rv0667	rpoB	DNA-directed RNA polymerase subunit beta
1.56078e+07	Rv0668	rpoC	DNA-directed RNA polymerase subunit beta'
1.56078e+07	Rv0670	end	endonuclease IV
1.56078e+07	Rv0673	echA4	enoyl-CoA hydratase
1.56078e+07	Rv0678	-	hypothetical protein Rv0678
1.56078e+07	Rv0681	-	TetR family transcriptional regulator
1.56078e+07	Rv0682	rpsL	30S ribosomal protein S12
1.56078e+07	Rv0683	rpsG	30S ribosomal protein S7
1.56078e+07	Rv0685	tuf	elongation factor Tu
1.56078e+07	Rv0687	fabG	3-ketoacyl-(acyl-carrier-protein) reductase
1.56078e+07	Rv0688	-	putative ferredoxin reductase
1.56078e+07	Rv0691c	-	transcriptional regulatory protein
1.56078e+07	Rv0694	lldD1	L-lactate dehydrogenase (cytochrome) LldD1
1.56078e+07	Rv0695	-	hypothetical protein Rv0695
1.56078e+07	Rv0697	-	dehydrogenase
1.56078e+07	Rv0700	rpsJ	30S ribosomal protein S10
1.56078e+07	Rv0701	rplC	50S ribosomal protein L3
1.56078e+07	Rv0702	rplD	50S ribosomal protein L4
1.56078e+07	Rv0703	rplW	50S ribosomal protein L23
1.56078e+07	Rv0704	rplB	50S ribosomal protein L2
1.56078e+07	Rv0705	rpsS	30S ribosomal protein S19
1.56078e+07	Rv0706	rplV	50S ribosomal protein L22
1.56078e+07	Rv0707	rpsC	30S ribosomal protein S3
1.56078e+07	Rv0708	rplP	50S ribosomal protein L16
1.56078e+07	Rv0709	rpmC	50S ribosomal protein L29
1.56079e+07	Rv0710	rpsQ	30S ribosomal protein S17
1.56079e+07	Rv0711	atsA	arylsulfatase AtsA
1.56079e+07	Rv0712	-	hypothetical protein Rv0712
1.56079e+07	Rv0714	rplN	50S ribosomal protein L14
1.56079e+07	Rv0715	rplX	50S ribosomal protein L24
1.56079e+07	Rv0716	rplE	50S ribosomal protein L5
1.56079e+07	Rv0718	rpsH	30S ribosomal protein S8
1.56079e+07	Rv0719	rplF	50S ribosomal protein L6
1.56079e+07	Rv0720	rplR	50S ribosomal protein L18
1.56079e+07	Rv0721	rpsE	30S ribosomal protein S5
1.56079e+07	Rv0722	rpmD	50S ribosomal protein L30
1.56079e+07	Rv0723	rplO	50S ribosomal protein L15
1.56079e+07	Rv0727c	fucA	L-fuculose-phosphate aldolase
1.56079e+07	Rv0728c	serA2	D-3-phosphoglycerate dehydrogenase
1.56079e+07	Rv0729	xylB	D-xylulose kinase XylB
1.56079e+07	Rv0732	secY	preprotein translocase subunit SecY
1.56079e+07	Rv0733	adk	adenylate kinase
1.56079e+07	Rv0735	sigL	RNA polymerase sigma factor SigL
1.56079e+07	Rv0737	-	transcriptional regulatory protein
1.56079e+07	Rv0749	-	hypothetical protein Rv0749
1.56079e+07	Rv0751c	mmsB	3-hydroxyisobutyrate dehydrogenase MmsB
1.56079e+07	Rv0752c	fadE9	acyl-CoA dehydrogenase FADE9
1.56079e+07	Rv0753c	mmsA	methylmalonate-semialdehyde dehydrogenase
1.56079e+07	Rv0757	phoP	two component system response transcriptional positive regulator PHOP
1.56079e+07	Rv0759c	-	hypothetical protein Rv0759c
1.56079e+07	Rv0760c	-	hypothetical protein Rv0760c
1.56079e+07	Rv0763c	-	ferredoxin
1.56079e+07	Rv0764c	cyp51	cytochrome P450 sterol 14-alpha demethylase
1.56079e+07	Rv0765c	-	short chain dehydrogenase
1.56079e+07	Rv0766c	cyp123	cytochrome P450 123
1.56079e+07	Rv0767c	-	hypothetical protein Rv0767c
1.56079e+07	Rv0768	aldA	aldehyde dehydrogenase NAD dependent AldA
1.56079e+07	Rv0769	-	short chain dehydrogenase
1.56079e+07	Rv0770	-	dehydrogenase/reductase
1.56079e+07	Rv0771	-	4-carboxymuconolactone decarboxylase
1.56079e+07	Rv0772	purD	phosphoribosylamine--glycine ligase
1.56079e+07	Rv0775	-	hypothetical protein Rv0775
1.56079e+07	Rv0777	purB	adenylosuccinate lyase
1.56079e+07	Rv0778	cyp126	cytochrome P450 126
1.56079e+07	Rv0780	hemH	phosphoribosylaminoimidazole-succinocarboxamide synthase
1.56079e+07	Rv0785	-	putative FAD-binding dehydrogenase
1.56079e+07	Rv0788	purQ	phosphoribosylformylglycinamidine synthase subunit I
1.56079e+07	Rv0791c	-	hypothetical protein Rv0791c
1.56079e+07	Rv0793	-	hypothetical protein Rv0793
1.56079e+07	Rv0799c	-	hypothetical protein Rv0799c
1.56079e+07	Rv0800	pepC	putative aminopeptidase 2
1.56079e+07	Rv0801	-	hypothetical protein Rv0801
1.56079e+07	Rv0803	purL	phosphoribosylformylglycinamidine synthase II
1.56079e+07	Rv0808	purF	amidophosphoribosyltransferase
1.56079e+07	Rv0809	purM	phosphoribosylaminoimidazole synthetase
1.5608e+07	Rv0811c	-	hypothetical protein Rv0811c
1.5608e+07	Rv0816c	thiX	thioredoxin ThiX
1.5608e+07	Rv0818	-	transcriptional regulatory protein
1.5608e+07	Rv0819	mshD	mshd, gcn5-related n-acetyltransferase
1.5608e+07	Rv0820	phoT	phosphate ABC transporter ATP-binding protein
1.5608e+07	Rv0821c	phoY2	phosphate transport regulator
1.5608e+07	Rv0823c	-	transcriptional regulatory protein
1.5608e+07	Rv0825c	-	hypothetical protein Rv0825c
1.5608e+07	Rv0827c	-	transcriptional regulatory protein
1.5608e+07	Rv0828c	-	deaminase
1.5608e+07	Rv0840c	pip	proline iminopeptidase
1.5608e+07	Rv0842	-	integral membrane protein
1.5608e+07	Rv0843	-	dehydrogenase
1.5608e+07	Rv0844c	narL	nitrate/nitrite response transcriptional regulatory protein NarL
1.5608e+07	Rv0849	-	integral membrane transport protein
1.5608e+07	Rv0851c	-	short chain dehydrogenase
1.5608e+07	Rv0853c	pdc	pyruvate or indole-3-pyruvate decarboxylase pdc
1.5608e+07	Rv0854	-	hypothetical protein Rv0854
1.5608e+07	Rv0855	far	fatty-acid-CoA racemase
1.5608e+07	Rv0856	-	hypothetical protein Rv0856
1.5608e+07	Rv0858c	dapC	probable n-succinyldiaminopimelate aminotransferase dapc (dap-at)
1.5608e+07	Rv0859	fadA	acetyl-CoA acetyltransferase
1.5608e+07	Rv0860	fadB	fatty oxidation protein FadB
1.5608e+07	Rv0864	moaC	molybdenum cofactor biosynthesis protein C
1.5608e+07	Rv0865	mog	molybdopterin biosynthesis Mog protein
1.5608e+07	Rv0866	moaE2	molybdenum cofactor biosynthesis protein E2
1.5608e+07	Rv0868c	moaD2	molybdenum cofactor biosynthesis protein D
1.5608e+07	Rv0869c	moaA	molybdenum cofactor biosynthesis protein A
1.5608e+07	Rv0871	cspB	cold shock-like protein B CspB
1.5608e+07	Rv0880	-	MarR family transcriptional regulator
1.5608e+07	Rv0881	-	rRNA methyltransferase
1.5608e+07	Rv0884c	serC	phosphoserine aminotransferase
1.5608e+07	Rv0886	fprB	NADPH:adrenodoxin oxidoreductase FprB
1.5608e+07	Rv0887c	-	hypothetical protein Rv0887c
1.5608e+07	Rv0889c	citA	citrate synthase 2
1.5608e+07	Rv0892	-	monooxygenase
1.5608e+07	Rv0896	gltA	type II citrate synthase
1.5608e+07	Rv0902c	prrB	two component sensor histidine kinase PRRB
1.5608e+07	Rv0903c	prrA	two component response transcriptional regulatory protein PRRA
1.5608e+07	Rv0904c	accD3	putative acetyl-coenzyme A carboxylase carboxyl transferase (subunit BETA) ACCD3 (ACCASE BETA chain)
1.5608e+07	Rv0905	echA6	enoyl-CoA hydratase
1.56081e+07	Rv0910	-	hypothetical protein Rv0910
1.56081e+07	Rv0911	-	hypothetical protein Rv0911
1.56081e+07	Rv0913c	-	dioxygenase
1.56081e+07	Rv0914c	-	acetyl-CoA acetyltransferase
1.56081e+07	Rv0919	-	hypothetical protein Rv0919
1.56081e+07	Rv0927c	-	short chain dehydrogenase
1.56081e+07	Rv0931c	pknD	transmembrane serine/threonine-protein kinase D PKND (protein kinase D) (STPK D)
1.56081e+07	Rv0933	pstB	phosphate ABC transporter ATP-binding protein
1.56081e+07	Rv0938	ligD	atp dependent dna ligase (atp dependent polydeoxyribonucleotide synthase) (thermostable dna ligase) (atp dependent polynucleotide ligase) (sealase) (dna repair enzyme) (dna joinase)
1.56081e+07	Rv0940c	-	oxidoreductase
1.56081e+07	Rv0944	-	formamidopyrimidine-DNA glycosylase
1.56081e+07	Rv0945	-	short chain dehydrogenase
1.56081e+07	Rv0946c	pgi	glucose-6-phosphate isomerase
1.56081e+07	Rv0948c	-	hypothetical protein Rv0948c
1.56081e+07	Rv0951	sucC	succinyl-CoA synthetase subunit beta
1.56081e+07	Rv0952	sucD	succinyl-CoA synthetase subunit alpha
1.56081e+07	Rv0953c	-	oxidoreductase
1.56081e+07	Rv0956	purN	phosphoribosylglycinamide formyltransferase
1.56081e+07	Rv0957	purH	bifunctional phosphoribosylaminoimidazolecarboxamide formyltransferase/IMP cyclohydrolase
1.56081e+07	Rv0960	vapC9	possible toxin vapc9
1.56081e+07	Rv0971c	echA7	enoyl-CoA hydratase
1.56081e+07	Rv0972c	fadE12	acyl-CoA dehydrogenase FADE12
1.56081e+07	Rv0973c	accA2	acetyl-/propionyl-coenzyme A carboxylase subunit alpha
1.56081e+07	Rv0974c	accD2	acetyl-/propionyl-CoA carboxylase subunit beta
1.56081e+07	Rv0975c	fadE13	acyl-CoA dehydrogenase FADE13
1.56081e+07	Rv0981	mprA	two component response transcriptional regulatory protein MprA
1.56081e+07	Rv0983	pepD	serine protease PepD
1.56081e+07	Rv0984	moaB2	pterin-4-alpha-carbinolamine dehydratase MoaB2
1.56081e+07	Rv0985c	mscL	large-conductance mechanosensitive channel
1.56081e+07	Rv0986	-	adhesion component transport ATP-binding protein ABC transporter
1.56081e+07	Rv0989c	grcC2	polyprenyl-diphosphate synthase
1.56081e+07	Rv0992c	-	hypothetical protein Rv0992c
1.56081e+07	Rv0993	galU	UTP--glucose-1-phosphate uridylyltransferase GalU
1.56081e+07	Rv0995	rimJ	ribosomal-protein-alanine acetyltransferase
1.56081e+07	Rv1001	arcA	arginine deiminase
1.56081e+07	Rv1005c	pabB	para-aminobenzoate synthase component I
1.56081e+07	Rv1007c	metG	methionyl-tRNA synthetase
1.56081e+07	Rv1008	tatD	deoxyribonuclease TatD (YjjV protein)
1.56081e+07	Rv1009	rpfB	resuscitation-promoting factor rpfB
1.56082e+07	Rv1010	ksgA	dimethyladenosine transferase
1.56082e+07	Rv1011	ispE	4-diphosphocytidyl-2-C-methyl-D-erythritol kinase
1.56082e+07	Rv1013	pks16	acyl-CoA synthetase
1.56082e+07	Rv1014c	pth	peptidyl-tRNA hydrolase
1.56082e+07	Rv1015c	rplY	50S ribosomal protein L25/general stress protein Ctc
1.56082e+07	Rv1017c	prsA	ribose-phosphate pyrophosphokinase
1.56082e+07	Rv1018c	glmU	UDP-N-acetylglucosamine pyrophosphorylase glmU
1.56082e+07	Rv1019	-	TetR family transcriptional regulator
1.56082e+07	Rv1020	mfd	transcription-repair coupling factor Mfd (TRCF)
1.56082e+07	Rv1023	eno	phosphopyruvate hydratase
1.56082e+07	Rv1026	-	hypothetical protein Rv1026
1.56082e+07	Rv1027c	kdpE	transcriptional regulatory protein KdpE
1.56082e+07	Rv1033c	trcR	two component transcriptional regulator TRCR
1.56082e+07	Rv1038c	esxJ	Esat-6 like protein esxJ (Esat-6 like protein 2)
1.56082e+07	Rv1049	-	transcriptional repressor protein
1.56082e+07	Rv1050	-	oxidoreductase
1.56082e+07	Rv1057	-	hypothetical protein Rv1057
1.56082e+07	Rv1058	fadD14	acyl-CoA synthetase
1.56082e+07	Rv1061	-	hypothetical protein Rv1061
1.56082e+07	Rv1066	-	hypothetical protein Rv1066
1.56082e+07	Rv1070c	echA8	enoyl-CoA hydratase
1.56082e+07	Rv1071c	echA9	enoyl-CoA hydratase
1.56082e+07	Rv1074c	fadA3	acetyl-CoA acetyltransferase
1.56082e+07	Rv1076	lipU	lipase LipU
1.56082e+07	Rv1079	metB	cystathionine gamma-synthase
1.56082e+07	Rv1080c	greA	transcription elongation factor GreA
1.56082e+07	Rv1082	mca	Mycothiol conjugate amidase Mca (Mycothiol S-conjugate amidase)
1.56082e+07	Rv1086	-	short (C15) chain Z-isoprenyl diphosphate synthase (Z-FPP synthase) (Z-farnesyl diphosphate synthase) (Z-FPP synthetase) (Z-farnesyl diphosphate synthetase) (geranyltranstransferase) (farnesyl pyrophosphate synthetase)
1.56082e+07	Rv1090	celA2b	endo-1,4-beta-glucanase
1.56082e+07	Rv1092c	coaA	pantothenate kinase
1.56082e+07	Rv1094	desA2	acyl-
1.56082e+07	Rv1096	-	glycosyl hydrolase
1.56082e+07	Rv1098c	fumC	fumarate hydratase
1.56082e+07	Rv1099c	glpX	fructose 1,6-bisphosphatase II
1.56082e+07	Rv1102c	mazF3	sequence-specific mrna cleavage
1.56082e+07	Rv1104	-	hypothetical protein Rv1104
1.56082e+07	Rv1106c	-	cholesterol dehydrogenase
1.56082e+07	Rv1107c	xseB	exodeoxyribonuclease VII small subunit
1.56083e+07	Rv1112	-	translation-associated GTPase
1.56083e+07	Rv1117	-	hypothetical protein Rv1117
1.56083e+07	Rv1119c	-	hypothetical protein Rv1119c
1.56083e+07	Rv1122	gnd2	6-phosphogluconate dehydrogenase-like protein
1.56083e+07	Rv1123c	bpoB	peroxidase BpoB
1.56083e+07	Rv1124	ephC	epoxide hydrolase EphC
1.56083e+07	Rv1127c	ppdK	pyruvate phosphate dikinase
1.56083e+07	Rv1130	prpD	possible methylcitrate dehydratase prpd
1.56083e+07	Rv1131	gltA1	methylcitrate synthase
1.56083e+07	Rv1133c	metE	5-methyltetrahydropteroyltriglutamate--homocysteine methyltransferase
1.56083e+07	Rv1136	-	enoyl-CoA hydratase
1.56083e+07	Rv1141c	echA11	enoyl-CoA hydratase
1.56083e+07	Rv1142c	echA10	enoyl-CoA hydratase
1.56083e+07	Rv1143	mcr	alpha-methylacyl-CoA racemase
1.56083e+07	Rv1144	-	short-chain type dehydrogenase/reductase
1.56083e+07	Rv1147	-	hypothetical protein Rv1147
1.56083e+07	Rv1151c	-	NAD-dependent deacetylase
1.56083e+07	Rv1155	-	hypothetical protein Rv1155
1.56083e+07	Rv1160	mutT2	7,8-dihydro-8-oxoguanine-triphosphatase
1.56083e+07	Rv1161	narG	respiratory nitrate reductase subunit alpha NarG
1.56083e+07	Rv1162	narH	respiratory nitrate reductase subunit beta NarH
1.56083e+07	Rv1164	narI	respiratory nitrate reductase subunit gamma NarI
1.56083e+07	Rv1166	lpqW	lipoprotein LpqW
1.56083e+07	Rv1167c	-	transcriptional regulatory protein
1.56083e+07	Rv1170	mshB	N-Acetyl-1-D-myo-Inosityl-2-amino-2-deoxy-alpha- D-glucopyranoside deacetylase mshB (GlcNAc-Ins deacetylase)
1.56083e+07	Rv1175c	fadH	NADPH dependent 2,4-dienoyl-CoA reductase
1.56083e+07	Rv1176c	-	hypothetical protein Rv1176c
1.56083e+07	Rv1177	fdxC	ferredoxin FdxC
1.56083e+07	Rv1178	-	N-succinyldiaminopimelate aminotransferase
1.56083e+07	Rv1180	pks3	polyketide beta-ketoacyl synthase PKS3
1.56083e+07	Rv1185c	fadD21	acyl-CoA synthetase
1.56083e+07	Rv1187	rocA	pyrroline-5-carboxylate dehydrogenase ROCA
1.56083e+07	Rv1188	-	proline dehydrogenase
1.56083e+07	Rv1190	-	hypothetical protein Rv1190
1.56083e+07	Rv1191	-	hypothetical protein Rv1191
1.56083e+07	Rv1193	fadD36	acyl-CoA synthetase
1.56083e+07	Rv1197	esxK	Esat-6 like protein esxK (Esat-6 like protein 3)
1.56083e+07	Rv1200	-	integral membrane transport protein
1.56083e+07	Rv1205	-	hypothetical protein Rv1205
1.56083e+07	Rv1206	fadD6	acyl-CoA synthetase
1.56083e+07	Rv1207	folP2	dihydropteroate synthase 2 FolP2
1.56084e+07	Rv1210	tagA	DNA-3-methyladenine glycosylase I
1.56084e+07	Rv1212c	-	putative glycosyl transferase
1.56084e+07	Rv1213	glgC	glucose-1-phosphate adenylyltransferase
1.56084e+07	Rv1218c	-	tetronasin-transport ATP-binding protein ABC transporter
1.56084e+07	Rv1219c	-	transcriptional regulatory protein
1.56084e+07	Rv1220c	-	methyltransferase
1.56084e+07	Rv1221	sigE	RNA polymerase sigma factor SigE
1.56084e+07	Rv1225c	-	hypothetical protein Rv1225c
1.56084e+07	Rv1235	lpqY	sugar-binding lipoprotein LpqY
1.56084e+07	Rv1238	sugC	sugar-transport ATP-binding protein ABC transporter SugC
1.56084e+07	Rv1239c	corA	magnesium/cobalt transporter CorA
1.56084e+07	Rv1240	mdh	malate dehydrogenase
1.56084e+07	Rv1242	-	hypothetical protein Rv1242
1.56084e+07	Rv1244	lpqZ	lipoprotein LpqZ
1.56084e+07	Rv1245c	-	short-chain type dehydrogenase/reductase
1.56084e+07	Rv1246c	relE1	function unknown
1.56084e+07	Rv1247c	relB1	function unknown
1.56084e+07	Rv1253	deaD	cold-shock DEAD-box protein A
1.56084e+07	Rv1255c	-	transcriptional regulatory protein
1.56084e+07	Rv1256c	cyp130	ytochrome P450 130 CYP130
1.56084e+07	Rv1257c	-	oxidoreductase
1.56084e+07	Rv1258c	-	integral membrane transport protein
1.56084e+07	Rv1260	-	hypothetical protein Rv1260
1.56084e+07	Rv1262c	-	HIT-like protein
1.56084e+07	Rv1263	amiB2	amidase
1.56084e+07	Rv1264	-	adenylyl cyclase
1.56084e+07	Rv1267c	embR	transcriptional regulatory protein EMBR
1.56084e+07	Rv1272c	-	drugs-transport transmembrane ATP-binding protein ABC transporter
1.56084e+07	Rv1273c	-	drugs-transport transmembrane ATP-binding protein ABC transporter
1.56084e+07	Rv1276c	-	hypothetical protein Rv1276c
1.56084e+07	Rv1279	-	dehydrogenase FAD flavoprotein GMC oxidoreductase
1.56084e+07	Rv1280c	oppA	periplasmic oligopeptide-binding lipoprotein OppA
1.56084e+07	Rv1284	canA	beta-carbonic anhydrase
1.56084e+07	Rv1285	cysD	sulfate adenylyltransferase subunit 2
1.56084e+07	Rv1286	cysN	bifunctional sulfate adenylyltransferase subunit 1/adenylylsulfate kinase protein
1.56084e+07	Rv1292	argS	arginyl-tRNA synthetase
1.56084e+07	Rv1293	lysA	diaminopimelate decarboxylase LysA
1.56084e+07	Rv1295	thrC	threonine synthase
1.56084e+07	Rv1296	thrB	homoserine kinase
1.56084e+07	Rv1297	rho	transcription termination factor Rho
1.56084e+07	Rv1298	rpmE	50S ribosomal protein L31
1.56084e+07	Rv1299	prfA	peptide chain release factor 1
1.56084e+07	Rv1300	hemK	hypothetical protein Rv1300
1.56084e+07	Rv1301	-	hypothetical protein Rv1301
1.56084e+07	Rv1305	atpE	F0F1 ATP synthase subunit C
1.56084e+07	Rv1308	atpA	F0F1 ATP synthase subunit alpha
1.56084e+07	Rv1309	atpG	F0F1 ATP synthase subunit gamma
1.56085e+07	Rv1310	atpD	F0F1 ATP synthase subunit beta
1.56085e+07	Rv1311	atpC	F0F1 ATP synthase subunit epsilon
1.56085e+07	Rv1314c	-	hypothetical protein Rv1314c
1.56085e+07	Rv1315	murA	UDP-N-acetylglucosamine 1-carboxyvinyltransferase
1.56085e+07	Rv1316c	ogt	methylated-DNA--protein-cysteine methyltransferase
1.56085e+07	Rv1323	fadA4	acetyl-CoA acetyltransferase
1.56085e+07	Rv1326c	glgB	glycogen branching enzyme
1.56085e+07	Rv1331	clpS	ATP-dependent Clp protease adaptor protein ClpS
1.56085e+07	Rv1333	-	hydrolase
1.56085e+07	Rv1335	cysO	probably involved in cysteine biosynthesis, as sulfur donor in thiocarboxylated form.
1.56085e+07	Rv1336	cysM	cysteine synthase B CysM
1.56085e+07	Rv1338	murI	glutamate racemase
1.56085e+07	Rv1339	-	hypothetical protein Rv1339
1.56085e+07	Rv1340	rph	ribonuclease PH
1.56085e+07	Rv1341	-	putative deoxyribonucleotide triphosphate pyrophosphatase
1.56085e+07	Rv1344	mbtL	probable acyl carrier protein (acp) mbtl
1.56085e+07	Rv1345	fadD33	acyl-CoA synthetase
1.56085e+07	Rv1346	fadE14	acyl-CoA dehydrogenase
1.56085e+07	Rv1347c	mbtK	lysine n-acetyltransferase mbtk
1.56085e+07	Rv1350	fabG	3-ketoacyl-(acyl-carrier-protein) reductase
1.56085e+07	Rv1360	-	oxidoreductase
1.56085e+07	Rv1365c	rsfA	anti-anti-sigma factor RSFA (anti-sigma factor antagonist) (regulator of sigma F A)
1.56085e+07	Rv1367c	-	hypothetical protein Rv1367c
1.56085e+07	Rv1373	-	glycolipid sulfotransferase
1.56085e+07	Rv1377c	-	putative transferase
1.56085e+07	Rv1379	pyrR	pyrimidine regulatory protein PyrR
1.56085e+07	Rv1380	pyrB	aspartate carbamoyltransferase catalytic subunit
1.56085e+07	Rv1381	pyrC	dihydroorotase
1.56085e+07	Rv1383	carA	carbamoyl phosphate synthase small subunit
1.56085e+07	Rv1385	pyrF	orotidine 5'-phosphate decarboxylase
1.56085e+07	Rv1389	gmk	guanylate kinase
1.56085e+07	Rv1392	metK	S-adenosylmethionine synthetase
1.56085e+07	Rv1393c	-	monoxygenase
1.56085e+07	Rv1397c	vapC10	possible toxin vapc10
1.56085e+07	Rv1399c	lipH	lipase LipH
1.56085e+07	Rv1400c	lipI	lipase LipH
1.56085e+07	Rv1404	-	transcriptional regulatory protein
1.56085e+07	Rv1405c	-	putative methyltransferase
1.56085e+07	Rv1406	fmt	methionyl-tRNA formyltransferase
1.56085e+07	Rv1407	fmu	Fmu protein (SUN protein)
1.56085e+07	Rv1408	rpe	ribulose-phosphate 3-epimerase
1.56085e+07	Rv1409	ribG	bifunctional diaminohydroxyphosphoribosylaminopyrimidine deaminase/5-amino-6-(5-phosphoribosylamino) uracil reductase
1.56085e+07	Rv1411c	lprG	lipoprotein LprG
1.56086e+07	Rv1412	ribC	riboflavin synthase subunit alpha
1.56086e+07	Rv1413	-	hypothetical protein Rv1413
1.56086e+07	Rv1415	ribA2	bifunctional 3,4-dihydroxy-2-butanone 4-phosphate synthase/GTP cyclohydrolase II protein
1.56086e+07	Rv1416	ribH	riboflavin synthase subunit beta
1.56086e+07	Rv1427c	fadD12	acyl-CoA synthetase
1.56086e+07	Rv1436	gap	glyceraldehyde-3-phosphate dehydrogenase
1.56086e+07	Rv1437	pgk	phosphoglycerate kinase
1.56086e+07	Rv1438	tpiA	triosephosphate isomerase
1.56086e+07	Rv1442	bisC	biotin sulfoxide reductase
1.56086e+07	Rv1445c	devB	6-phosphogluconolactonase
1.56086e+07	Rv1447c	zwf2	glucose-6-phosphate 1-dehydrogenase
1.56086e+07	Rv1448c	tal	transaldolase
1.56086e+07	Rv1449c	tkt	transketolase
1.56086e+07	Rv1454c	qor	quinone reductase
1.56086e+07	Rv1458c	-	unidentified antibiotic-transport ATP-binding protein ABC transporter
1.56086e+07	Rv1462	-	hypothetical protein Rv1462
1.56086e+07	Rv1463	-	ABC transporter ATP-binding protein
1.56086e+07	Rv1464	csd	cysteine desulfurase
1.56086e+07	Rv1465	-	nitrogen fixation related protein
1.56086e+07	Rv1466	-	hypothetical protein Rv1466
1.56086e+07	Rv1470	trxA	thioredoxin TRXA
1.56086e+07	Rv1472	echA12	enoyl-CoA hydratase
1.56086e+07	Rv1474c	-	transcriptional regulatory protein
1.56086e+07	Rv1475c	acn	aconitate hydratase
1.56086e+07	Rv1483	fabG1	3-oxoacyl-
1.56086e+07	Rv1484	inhA	enoyl-(acyl carrier protein) reductase
1.56086e+07	Rv1485	hemH	ferrochelatase
1.56086e+07	Rv1492	mutA	methylmalonyl-CoA mutase small subunit
1.56086e+07	Rv1493	mutB	methylmalonyl-CoA mutase
1.56086e+07	Rv1495	mazF4	sequence-specific mrna cleavage
1.56086e+07	Rv1497	lipL	esterase LipL
1.56086e+07	Rv1503c	-	hypothetical protein Rv1503c
1.56086e+07	Rv1504c	-	hypothetical protein Rv1504c
1.56086e+07	Rv1511	gmdA	GDP-D-mannose dehydratase gmdA (GDP-mannose 4,6 dehydratase) (GMD)
1.56087e+07	Rv1512	epiA	nucleotide-sugar epimerase epiA
1.56087e+07	Rv1521	fadD25	acyl-CoA synthetase
1.56087e+07	Rv1524	-	glycosyltransferase
1.56087e+07	Rv1526c	-	glycosyltransferase
1.56087e+07	Rv1529	fadD24	acyl-CoA synthetase
1.56087e+07	Rv1530	adh	alcohol dehydrogenase adh
1.56087e+07	Rv1532c	-	hypothetical protein Rv1532c
1.56087e+07	Rv1533	-	hypothetical protein Rv1533
1.56087e+07	Rv1534	-	transcriptional regulator
1.56087e+07	Rv1536	ileS	isoleucyl-tRNA synthetase
1.56087e+07	Rv1538c	ansA	L-aparaginase ansA
1.56087e+07	Rv1540	-	hypothetical protein Rv1540
1.56087e+07	Rv1542c	glbN	hemoglobin glbN
1.56087e+07	Rv1543	-	fatty acyl-CoA reductase
1.56087e+07	Rv1544	-	ketoacyl reductase
1.56087e+07	Rv1546	-	hypothetical protein Rv1546
1.56087e+07	Rv1552	frdA	fumarate reductase flavoprotein subunit
1.56087e+07	Rv1553	frdB	fumarate reductase iron-sulfur subunit FrdB
1.56087e+07	Rv1554	frdC	fumarate reductase subunit C
1.56087e+07	Rv1555	frdD	fumarate reductase subunit D
1.56087e+07	Rv1556	-	regulatory protein
1.56087e+07	Rv1559	ilvA	threonine dehydratase
1.56087e+07	Rv1561	vapC11	possible toxin vapc11
1.56087e+07	Rv1568	bioA	adenosylmethionine--8-amino-7-oxononanoate transaminase
1.56087e+07	Rv1570	bioD	dithiobiotin synthetase
1.56087e+07	Rv1571	-	hypothetical protein Rv1571
1.56087e+07	Rv1589	bioB	biotin synthase
1.56087e+07	Rv1593c	-	hypothetical protein Rv1593c
1.56087e+07	Rv1594	nadA	quinolinate synthetase
1.56087e+07	Rv1595	nadB	L-aspartate oxidase
1.56087e+07	Rv1596	nadC	nicotinate-nucleotide pyrophosphorylase
1.56087e+07	Rv1599	hisD	histidinol dehydrogenase
1.56087e+07	Rv1601	hisB	imidazoleglycerol-phosphate dehydratase
1.56087e+07	Rv1602	hisH	imidazole glycerol phosphate synthase subunit HisH
1.56087e+07	Rv1603	hisA	1-(5-phosphoribosyl)-5-
1.56087e+07	Rv1604	impA	inositol-monophosphatase
1.56087e+07	Rv1605	hisF	imidazole glycerol phosphate synthase subunit HisF
1.56087e+07	Rv1608c	bcpB	peroxidoxin BcpB
1.56087e+07	Rv1609	trpE	anthranilate synthase component I
1.56087e+07	Rv1611	trpC	indole-3-glycerol-phosphate synthase
1.56088e+07	Rv1612	trpB	tryptophan synthase subunit beta
1.56088e+07	Rv1613	trpA	tryptophan synthase subunit alpha
1.56088e+07	Rv1617	pykA	pyruvate kinase
1.56088e+07	Rv1618	tesB1	acyl-CoA thioesterase II TesB1
1.56088e+07	Rv1626	-	two-component system transcriptional regulator
1.56088e+07	Rv1627c	-	lipid-transfer protein
1.56088e+07	Rv1629	polA	DNA polymerase I
1.56088e+07	Rv1633	uvrB	excinuclease ABC subunit B
1.56088e+07	Rv1636	TB15.3	hypothetical protein Rv1636
1.56088e+07	Rv1637c	-	hypothetical protein Rv1637c
1.56088e+07	Rv1641	infC	translation initiation factor IF-3
1.56088e+07	Rv1642	rpmI	50S ribosomal protein L35
1.56088e+07	Rv1643	rplT	50S ribosomal protein L20
1.56088e+07	Rv1644	tsnR	23S rRNA methyltransferase TsnR
1.56088e+07	Rv1649	pheS	phenylalanyl-tRNA synthetase subunit alpha
1.56088e+07	Rv1650	pheT	phenylalanyl-tRNA synthetase subunit beta
1.56088e+07	Rv1652	argC	N-acetyl-gamma-glutamyl-phosphate reductase
1.56088e+07	Rv1653	argJ	bifunctional ornithine acetyltransferase/N-acetylglutamate synthase protein
1.56088e+07	Rv1654	argB	acetylglutamate kinase
1.56088e+07	Rv1655	argD	acetylornithine aminotransferase
1.56088e+07	Rv1656	argF	ornithine carbamoyltransferase
1.56088e+07	Rv1657	argR	arginine repressor
1.56088e+07	Rv1658	argG	argininosuccinate synthase
1.56088e+07	Rv1659	argH	argininosuccinate lyase
1.56088e+07	Rv1660	pks10	chalcone synthase
1.56088e+07	Rv1662	pks8	polyketide synthase pks8
1.56088e+07	Rv1664	pks9	polyketide synthase pks9
1.56088e+07	Rv1665	pks11	chalcone synthase
1.56088e+07	Rv1666c	cyp139	cytochrome P450 139 CYP139
1.56088e+07	Rv1672c	-	integral membrane transport protein
1.56088e+07	Rv1674c	-	transcriptional regulatory protein
1.56088e+07	Rv1675c	-	transcriptional regulatory protein
1.56088e+07	Rv1677	dsbF	lipoprotein DsbF
1.56088e+07	Rv1679	fadE16	acyl-CoA dehydrogenase
1.56088e+07	Rv1680	-	hypothetical protein Rv1680
1.56088e+07	Rv1685c	-	hypothetical protein Rv1685c
1.56088e+07	Rv1686c	-	integral membrane protein ABC transporter
1.56088e+07	Rv1687c	-	ABC transporter ATP-binding protein
1.56088e+07	Rv1688	mpg	3-methyladenine DNA glycosylase
1.56088e+07	Rv1689	tyrS	tyrosyl-tRNA synthetase
1.56088e+07	Rv1691	-	hypothetical protein Rv1691
1.56088e+07	Rv1692	-	phosphatase
1.56088e+07	Rv1695	ppnK	inorganic polyphosphate/ATP-NAD kinase
1.56088e+07	Rv1699	pyrG	CTP synthetase
1.56088e+07	Rv1700	-	hypothetical protein Rv1700
1.56088e+07	Rv1701	xerD	site-specific tyrosine recombinase XerD
1.56088e+07	Rv1703c	-	catechol-o-methyltransferase
1.56088e+07	Rv1704c	cycA	D-serine/alanine/glycine transporter protein CycA
1.56088e+07	Rv1708	-	putative initiation inhibitor protein
1.56088e+07	Rv1710	scpB	possible segregation and condensation protein scpb
1.56088e+07	Rv1711	-	hypothetical protein Rv1711
1.56089e+07	Rv1712	cmk	cytidylate kinase
1.56089e+07	Rv1713	engA	GTP-binding protein EngA
1.56089e+07	Rv1714	-	oxidoreductase
1.56089e+07	Rv1717	-	hypothetical protein Rv1717
1.56089e+07	Rv1719	-	transcriptional regulatory protein
1.56089e+07	Rv1720c	vapC12	possible toxin vapc12
1.56089e+07	Rv1723	-	hydrolase
1.56089e+07	Rv1726	-	oxidoreductase
1.56089e+07	Rv1732c	-	hypothetical protein Rv1732c
1.56089e+07	Rv1734c	-	hypothetical protein Rv1734c
1.56089e+07	Rv1737c	narK2	nitrate/nitrite transporter NarK2
1.56089e+07	Rv1738	-	hypothetical protein Rv1738
1.56089e+07	Rv1743	pknE	transmembrane serine/threonine-protein kinase E
1.56089e+07	Rv1745c	idi	isopentenyl-diphosphate delta-isomerase
1.56089e+07	Rv1750c	fadD1	acyl-CoA synthetase
1.56089e+07	Rv1751	-	hypothetical protein Rv1751
1.56089e+07	Rv1758	cut1	cutinase Cut1
1.56089e+07	Rv1767	-	hypothetical protein Rv1767
1.56089e+07	Rv1771	-	oxidoreductase
1.56089e+07	Rv1773c	-	transcriptional regulatory protein
1.56089e+07	Rv1774	-	oxidoreductase
1.56089e+07	Rv1776c	-	transcriptional regulatory protein
1.56089e+07	Rv1777	cyp144	cytochrome p450 144 CYP144
1.56089e+07	Rv1785c	cyp143	cytochrome P450 143
1.56089e+07	Rv1786	-	ferredoxin
1.56089e+07	Rv1812c	-	dehydrogenase
1.5609e+07	Rv1816	-	transcriptional regulatory protein
1.5609e+07	Rv1817	-	hypothetical protein Rv1817
1.5609e+07	Rv1820	ilvG	hypothetical protein Rv1820
1.5609e+07	Rv1821	secA2	preprotein translocase subunit SecA
1.5609e+07	Rv1826	gcvH	glycine cleavage system protein H
1.5609e+07	Rv1827	cfp17	hypothetical protein Rv1827
1.5609e+07	Rv1829	-	hypothetical protein Rv1829
1.5609e+07	Rv1833c	-	haloalkane dehalogenase
1.5609e+07	Rv1834	lipZ	probable hydrolase
1.5609e+07	Rv1835c	-	hypothetical protein Rv1835c
1.5609e+07	Rv1837c	glcB	malate synthase G
1.5609e+07	Rv1838c	vapC13	possible toxin vapc13
1.5609e+07	Rv1843c	guaB1	inositol-5-monophosphate dehydrogenase
1.5609e+07	Rv1846c	blaI	transcriptional repressor blai
1.5609e+07	Rv1847	-	hypothetical protein Rv1847
1.5609e+07	Rv1848	ureA	urease subunit gamma
1.5609e+07	Rv1849	ureB	urease subunit beta
1.5609e+07	Rv1850	ureC	urease subunit alpha
1.5609e+07	Rv1852	ureG	urease accessory protein ureG
1.5609e+07	Rv1855c	-	oxidoreductase
1.5609e+07	Rv1856c	-	short chain dehydrogenase
1.5609e+07	Rv1857	modA	molybdate-binding lipoprotein
1.5609e+07	Rv1859	modC	molybdenum ABC transporter ATP-binding protein
1.5609e+07	Rv1862	adhA	alcohol dehydrogenase AdhA
1.5609e+07	Rv1865c	-	short chain dehydrogenase
1.5609e+07	Rv1869c	-	reductase
1.5609e+07	Rv1872c	lldD2	L-lactate dehydrogenase (cytochrome) LldD2
1.5609e+07	Rv1873	-	hypothetical protein Rv1873
1.5609e+07	Rv1875	-	hypothetical protein Rv1875
1.5609e+07	Rv1876	bfrA	bacterioferritin
1.5609e+07	Rv1878	glnA3	glutamine synthetase
1.5609e+07	Rv1880c	cyp140	cytochrome p450 140 CYP140
1.5609e+07	Rv1882c	-	short chain dehydrogenase
1.5609e+07	Rv1884c	rpfC	resuscitation-promoting factor RpfC
1.5609e+07	Rv1885c	-	chorismate mutase
1.5609e+07	Rv1886c	fbpB	secreted antigen 85-B fbpB (85B) (antigen 85 complex B) (Mycolyl transferase 85B) (fibronectin-binding protein B) (extracellular alpha-antigen)
1.5609e+07	Rv1895	-	dehydrogenase
1.5609e+07	Rv1897c	-	D-tyrosyl-tRNA deacylase
1.5609e+07	Rv1898	-	hypothetical protein Rv1898
1.5609e+07	Rv1900c	lipJ	lignin peroxidase LIPJ
1.5609e+07	Rv1902c	nanT	sialic acid-transport integral membrane protein NanT
1.5609e+07	Rv1904	-	hypothetical protein Rv1904
1.5609e+07	Rv1905c	aao	D-amino acid oxidase
1.5609e+07	Rv1908c	katG	catalase-peroxidase-peroxynitritase T KATG
1.5609e+07	Rv1909c	furA	ferric uptake regulation protein furA (fur)
1.5609e+07	Rv1912c	fadB5	oxidoreductase FADB5
1.56091e+07	Rv1913	-	hypothetical protein Rv1913
1.56091e+07	Rv1915	aceAa	isocitrate lyase
1.56091e+07	Rv1919c	-	hypothetical protein Rv1919c
1.56091e+07	Rv1922	-	lipoprotein
1.56091e+07	Rv1923	lipD	lipase LIPD
1.56091e+07	Rv1925	fadD31	acyl-CoA synthetase
1.56091e+07	Rv1926c	mpt63	immunogenic protein MPT63 (antigen MPT63/MPB63) (16 kDa immunoprotective extracellular protein)
1.56091e+07	Rv1928c	-	short chain dehydrogenase
1.56091e+07	Rv1932	tpx	thiol peroxidase
1.56091e+07	Rv1933c	fadE18	acyl-CoA dehydrogenase FADE18
1.56091e+07	Rv1934c	fadE17	acyl-CoA dehydrogenase FADE17
1.56091e+07	Rv1935c	echA13	enoyl-CoA hydratase
1.56091e+07	Rv1936	-	monooxygenase
1.56091e+07	Rv1938	ephB	epoxide hydrolase EphB
1.56091e+07	Rv1939	-	oxidoreductase
1.56091e+07	Rv1941	-	short-chain type dehydrogenase/reductase
1.56091e+07	Rv1942c	mazF5	function unknown
1.56091e+07	Rv1956	higB1	possible toxin higb1
1.56091e+07	Rv1962c	-	hypothetical protein Rv1962c
1.56091e+07	Rv1979c	-	permease
1.56091e+07	Rv1982c	-	hypothetical protein Rv1982c
1.56091e+07	Rv1984c	cfp21	cutinase precursor CFP21
1.56091e+07	Rv1985c	-	chromosome replication initiation inhibitor protein
1.56091e+07	Rv1987	-	chitinase
1.56091e+07	Rv1988	-	methyltransferase
1.56091e+07	Rv1991c	mazF6	sequence-specific mrna cleavage
1.56091e+07	Rv1994c	cmtR	metal sensor transcriptional regulator cmtr (arsr-smtb family)
1.56091e+07	Rv1997	ctpF	metal cation transporter P-type ATPase A CtpF
1.56091e+07	Rv1998c	-	hypothetical protein Rv1998c
1.56091e+07	Rv2002	fabG3	20-beta-hydroxysteroid dehydrogenase
1.56091e+07	Rv2003c	-	hypothetical protein Rv2003c
1.56091e+07	Rv2007c	fdxA	ferredoxin FDXA
1.56091e+07	Rv2010	vapC15	possible toxin vapc15
1.56091e+07	Rv2011c	-	hypothetical protein Rv2011c
1.56092e+07	Rv2021c	-	transcriptional regulatory protein
1.56092e+07	Rv2029c	pfkB	phosphofructokinase PfkB (phosphohexokinase)
1.56092e+07	Rv2031c	hspX	heat shock protein hspX
1.56092e+07	Rv2034	-	ArsR-type repressor protein
1.56092e+07	Rv2035	-	hypothetical protein Rv2035
1.56092e+07	Rv2038c	-	sugar-transport ATP-binding protein ABC transporter
1.56092e+07	Rv2041c	-	sugar-binding lipoprotein
1.56092e+07	Rv2043c	pncA	pyrazinamidase/nicotinamidas PNCA (PZase)
1.56092e+07	Rv2045c	lipT	carboxylesterase LipT
1.56092e+07	Rv2054	-	hypothetical protein Rv2054
1.56092e+07	Rv2055c	rpsR	30S ribosomal protein S18
1.56092e+07	Rv2056c	rpsN	30S ribosomal protein S14
1.56092e+07	Rv2060	-	integral membrane protein
1.56092e+07	Rv2061c	-	hypothetical protein Rv2061c
1.56092e+07	Rv2064	cobG	cobalamin biosynthesis protein CobG
1.56092e+07	Rv2065	cobH	precorrin-8X methylmutase
1.56092e+07	Rv2068c	blaC	class A BETA-lactamase BLAC
1.56092e+07	Rv2069	sigC	RNA polymerase sigma factor SigC
1.56092e+07	Rv2071c	cobM	precorrin-4 C11-methyltransferase CobM
1.56092e+07	Rv2073c	-	shortchain dehydrogenase
1.56092e+07	Rv2074	-	hypothetical protein Rv2074
1.56092e+07	Rv2089c	pepE	dipeptidase PepE
1.56092e+07	Rv2090	-	5'-3' exonuclease
1.56092e+07	Rv2103c	-	hypothetical protein Rv2103c
1.56092e+07	Rv2109c	prcA	proteasome (alpha subunit) PrcA
1.56092e+07	Rv2110c	prcB	proteasome (beta subunit) PrcB
1.56093e+07	Rv2117	-	hypothetical protein Rv2117
1.56093e+07	Rv2118c	-	RNA methyltransferase
1.56093e+07	Rv2121c	hisG	ATP phosphoribosyltransferase
1.56093e+07	Rv2129c	-	short chain dehydrogenase
1.56093e+07	Rv2130c	cysS	cysteinyl-tRNA synthetase
1.56093e+07	Rv2131c	cysQ	monophosphatase CysQ
1.56093e+07	Rv2135c	-	hypothetical protein Rv2135c
1.56093e+07	Rv2139	pyrD	dihydroorotate dehydrogenase 2
1.56093e+07	Rv2140c	TB18.6	hypothetical protein Rv2140c
1.56093e+07	Rv2143	-	hypothetical protein Rv2143
1.56093e+07	Rv2148c	-	hypothetical protein Rv2148c
1.56093e+07	Rv2149c	yfiH	hypothetical protein Rv2149c
1.56093e+07	Rv2150c	ftsZ	cell division protein FtsZ
1.56093e+07	Rv2152c	murC	UDP-N-acetylmuramate--L-alanine ligase
1.56093e+07	Rv2153c	murG	N-acetylglucosaminyl transferase
1.56093e+07	Rv2155c	murD	UDP-N-acetylmuramoyl-L-alanyl-D-glutamate synthetase
1.56093e+07	Rv2157c	murF	UDP-N-acetylmuramoylalanyl-D-glutamyl-2,6-diaminopimelate- D-alanyl-D-alanyl ligase MurF
1.56093e+07	Rv2158c	murE	UDP-N-acetylmuramoylalanyl-D-glutamate--2,6-diaminopimelate ligase
1.56093e+07	Rv2160c	-	hypothetical protein Rv2160c
1.56093e+07	Rv2161c	-	hypothetical protein Rv2161c
1.56093e+07	Rv2165c	mraW	S-adenosyl-methyltransferase
1.56093e+07	Rv2166c	-	cell division protein MraZ
1.56093e+07	Rv2173	idsA2	geranylgeranyl pyrophosphate synthetase
1.56093e+07	Rv2176	pknL	transmembrane serine/threonine-protein kinase L
1.56093e+07	Rv2178c	aroG	3-deoxy-D-arabino-heptulosonate 7-phosphate synthase AroG
1.56093e+07	Rv2185c	TB16.3	hypothetical protein Rv2185c
1.56093e+07	Rv2187	fadD15	long-chain-fatty-acid-CoA ligase fadD15 (fatty-acid-CoA synthetase) (fatty-acid-CoA synthase)
1.56093e+07	Rv2192c	trpD	anthranilate phosphoribosyltransferase
1.56093e+07	Rv2193	ctaE	cytochrome C oxidase subunit III
1.56093e+07	Rv2202c	cbhK	carbohydrate kinase CbhK
1.56093e+07	Rv2204c	-	hypothetical protein Rv2204c
1.56093e+07	Rv2207	cobT	nicotinate-nucleotide--dimethylbenzimidazole phosphoribosyltransferase
1.56093e+07	Rv2210c	ilvE	branched-chain amino acid aminotransferase
1.56093e+07	Rv2211c	gcvT	glycine cleavage system aminomethyltransferase T
1.56093e+07	Rv2212	-	hypothetical protein Rv2212
1.56094e+07	Rv2213	pepB	leucyl aminopeptidase
1.56094e+07	Rv2216	-	hypothetical protein Rv2216
1.56094e+07	Rv2217	lipB	lipoyltransferase
1.56094e+07	Rv2220	glnA1	glutamine synthetase GLNA1 (glutamine synthase) (GS-I)
1.56094e+07	Rv2222c	glnA2	glutamine synthetase
1.56094e+07	Rv2225	panB	3-methyl-2-oxobutanoate hydroxymethyltransferase
1.56094e+07	Rv2228c	-	bifunctional RNase H/acid phosphatase
1.56094e+07	Rv2230c	-	hypothetical protein Rv2230c
1.56094e+07	Rv2231c	cobC	hypothetical protein Rv2231c
1.56094e+07	Rv2234	ptpA	phosphotyrosine protein phosphatase PTPA (protein-tyrosine-phosphatase) (PTPase) (LMW phosphatase)
1.56094e+07	Rv2238c	ahpE	peroxiredoxin AhpE
1.56094e+07	Rv2241	aceE	pyruvate dehydrogenase subunit E1
1.56094e+07	Rv2243	fabD	acyl-carrier-protein S-malonyltransferase
1.56094e+07	Rv2244	acpP	acyl carrier protein
1.56094e+07	Rv2245	kasA	3-oxoacyl-(acyl carrier protein) synthase II
1.56094e+07	Rv2246	kasB	3-oxoacyl-(acyl carrier protein) synthase II
1.56094e+07	Rv2247	accD6	acetyl/propionyl-CoA carboxylase beta subunit AccD6
1.56094e+07	Rv2251	-	flavoprotein
1.56094e+07	Rv2257c	-	hypothetical protein Rv2257c
1.56094e+07	Rv2258c	-	transcriptional regulator
1.56094e+07	Rv2259	adhE2	zinc-dependent alcohol dehydrogenase AdhE2
1.56094e+07	Rv2260	-	hypothetical protein Rv2260
1.56094e+07	Rv2263	-	short chain dehydrogenase
1.56094e+07	Rv2265	-	integral membrane protein
1.56094e+07	Rv2266	cyp124	cytochrome P450 124 CYP124
1.56094e+07	Rv2268c	cyp128	cytochrome P450 128
1.56094e+07	Rv2276	cyp121	cytochrome P450 121 CYP121
1.56094e+07	Rv2280	-	dehydrogenase
1.56094e+07	Rv2282c	-	LysR family transcriptional regulator
1.56094e+07	Rv2284	lipM	esterase LipM
1.56094e+07	Rv2291	sseB	thiosulfate sulfurtransferase SseB
1.56094e+07	Rv2292c	-	hypothetical protein Rv2292c
1.56094e+07	Rv2294	-	aminotransferase
1.56094e+07	Rv2296	-	haloalkane dehalogenase
1.56094e+07	Rv2298	-	hypothetical protein Rv2298
1.56094e+07	Rv2299c	htpG	heat shock protein 90
1.56094e+07	Rv2302	-	hypothetical protein Rv2302
1.56094e+07	Rv2303c	-	antibiotic-resistance protein
1.56094e+07	Rv2305	-	hypothetical protein Rv2305
1.56094e+07	Rv2307c	-	hypothetical protein Rv2307c
1.56095e+07	Rv2314c	-	hypothetical protein Rv2314c
1.56095e+07	Rv2318	uspC	periplasmic sugar-binding lipoprotein UspC
1.56095e+07	Rv2321c	rocD2	ornithine aminotransferase
1.56095e+07	Rv2322c	rocD1	ornithine aminotransferase
1.56095e+07	Rv2323c	-	hypothetical protein Rv2323c
1.56095e+07	Rv2324	-	AsnC family transcriptional regulator
1.56095e+07	Rv2327	-	hypothetical protein Rv2327
1.56095e+07	Rv2335	cysE	serine acetyltransferase CysE
1.56095e+07	Rv2347c	esxP	putative ESAT-6 like protein ESXP (ESAT-6 like protein 7)
1.56095e+07	Rv2357c	glyS	glycyl-tRNA synthetase
1.56095e+07	Rv2358	-	ArsR family transcriptional regulator
1.56095e+07	Rv2359	furB	ferric uptake regulation protein FURB
1.56095e+07	Rv2361c	-	long (C50) chain Z-isoprenyl diphosphate synthase (Z-decaprenyl diphosphate synthase)
1.56095e+07	Rv2362c	recO	DNA repair protein RecO
1.56095e+07	Rv2363	amiA2	amidase
1.56095e+07	Rv2365c	-	hypothetical protein Rv2365c
1.56095e+07	Rv2367c	-	putative metalloprotease
1.56095e+07	Rv2372c	-	hypothetical protein Rv2372c
1.56095e+07	Rv2374c	hrcA	heat-inducible transcription repressor
1.56095e+07	Rv2382c	mbtC	polyketide synthetase MBTC (polyketide synthase)
1.56095e+07	Rv2384	mbtA	bifunctional salicyl-AMP ligase/salicyl-S-arcp synthetase
1.56095e+07	Rv2388c	hemN	coproporphyrinogen III oxidase
1.56095e+07	Rv2391	nirA	ferredoxin-dependent nitrite reductase NIRA
1.56095e+07	Rv2392	cysH	phosphoadenosine phosphosulfate reductase
1.56095e+07	Rv2400c	subI	sulfate-binding lipoprotein
1.56095e+07	Rv2406c	-	hypothetical protein Rv2406c
1.56095e+07	Rv2407	-	ribonuclease Z
1.56095e+07	Rv2412	rpsT	30S ribosomal protein S20
1.56096e+07	Rv2413c	-	hypothetical protein Rv2413c
1.56096e+07	Rv2417c	-	hypothetical protein Rv2417c
1.56096e+07	Rv2419c	-	phosphoglycerate mutase (phosphoglyceromutase)
1.56096e+07	Rv2421c	nadD	nicotinic acid mononucleotide adenylyltransferase
1.56096e+07	Rv2427c	proA	gamma-glutamyl phosphate reductase
1.56096e+07	Rv2428	ahpC	alkyl hydroperoxide reductase subunit C
1.56096e+07	Rv2429	ahpD	alkyl hydroperoxide reductase subunit D
1.56096e+07	Rv2436	rbsK	ribokinase RBSK
1.56096e+07	Rv2439c	proB	gamma-glutamyl kinase
1.56096e+07	Rv2440c	obgE	GTPase ObgE
1.56096e+07	Rv2441c	rpmA	50S ribosomal protein L27
1.56096e+07	Rv2442c	rplU	50S ribosomal protein L21
1.56096e+07	Rv2443	dctA	C4-dicarboxylate-transport transmembrane protein DctA
1.56096e+07	Rv2445c	ndk	nucleoside diphosphate kinase
1.56096e+07	Rv2447c	folC	folylpolyglutamate synthase protein FolC
1.56096e+07	Rv2448c	valS	valyl-tRNA synthetase
1.56096e+07	Rv2450c	rpfE	resuscitation-promoting factor RpfE
1.56096e+07	Rv2453c	mobA	molybdopterin-guanine dinucleotide biosynthesis protein A
1.56096e+07	Rv2456c	-	integral membrane transport protein
1.56096e+07	Rv2457c	clpX	ATP-dependent protease ATP-binding subunit
1.56096e+07	Rv2458	mmuM	homocysteine methyltransferase
1.56096e+07	Rv2460c	clpP2	ATP-dependent Clp protease proteolytic subunit
1.56096e+07	Rv2462c	tig	trigger factor
1.56096e+07	Rv2463	lipP	esterase/lipase LipP
1.56096e+07	Rv2464c	-	DNA glycosylase
1.56096e+07	Rv2470	glbO	globin GlbO
1.56096e+07	Rv2471	aglA	alpha-glucosidase AglA
1.56096e+07	Rv2475c	-	hypothetical protein Rv2475c
1.56096e+07	Rv2486	echA14	enoyl-CoA hydratase
1.56096e+07	Rv2491	-	hypothetical protein Rv2491
1.56096e+07	Rv2494	-	hypothetical protein Rv2494
1.56096e+07	Rv2495c	pdhC	branched-chain alpha-keto acid dehydrogenase subunit E2
1.56096e+07	Rv2496c	pdhB	pyruvate dehydrogenase E1 component beta subunit PdhB
1.56096e+07	Rv2497c	pdhA	pyruvate dehydrogenase E1 component alpha subunit PdhA
1.56096e+07	Rv2498c	citE	citrate (Pro-3S)-lyase beta subunit
1.56096e+07	Rv2499c	-	oxidase regulatory-like protein
1.56096e+07	Rv2500c	fadE19	acyl-CoA dehydrogenase
1.56096e+07	Rv2501c	accA1	acetyl-/propionyl-coenzyme A carboxylase subunit alpha
1.56096e+07	Rv2502c	accD1	acetyl-/propionyl-CoA carboxylase subunit beta
1.56096e+07	Rv2503c	scoB	succinyl-CoA:3-ketoacid-coenzyme A transferase subunit beta ScoB
1.56096e+07	Rv2504c	scoA	succinyl-CoA:3-ketoacid-coenzyme A transferase subunit alpha ScoA
1.56096e+07	Rv2505c	fadD35	acyl-CoA synthetase
1.56096e+07	Rv2506	-	TetR family transcriptional regulator
1.56096e+07	Rv2508c	-	hypothetical protein Rv2508c
1.56096e+07	Rv2509	-	short-chain type dehydrogenase/reductase
1.56096e+07	Rv2511	orn	oligoribonuclease
1.56097e+07	Rv2521	bcp	bacterioferritin comigratory protein BCP
1.56097e+07	Rv2523c	acpS	4'-phosphopantetheinyl transferase
1.56097e+07	Rv2530c	-	hypothetical protein Rv2530c
1.56097e+07	Rv2533c	nusB	transcription antitermination protein NusB
1.56097e+07	Rv2534c	efp	elongation factor P
1.56097e+07	Rv2535c	pepQ	cytoplasmic peptidase PepQ
1.56097e+07	Rv2537c	aroD	3-dehydroquinate dehydratase
1.56097e+07	Rv2538c	aroB	3-dehydroquinate synthase
1.56097e+07	Rv2539c	aroK	shikimate kinase
1.56097e+07	Rv2540c	aroF	chorismate synthase
1.56097e+07	Rv2548	vapC19	possible toxin vapc19
1.56097e+07	Rv2549c	vapC20	possible toxin vapc20
1.56097e+07	Rv2552c	aroE	shikimate 5-dehydrogenase
1.56097e+07	Rv2554c	-	Holliday junction resolvase-like protein
1.56097e+07	Rv2555c	alaS	alanyl-tRNA synthetase
1.56097e+07	Rv2556c	-	hypothetical protein Rv2556c
1.56097e+07	Rv2564	glnQ	glutamine-transport ATP-binding protein ABC transporter GlnQ
1.56097e+07	Rv2570	-	hypothetical protein Rv2570
1.56097e+07	Rv2572c	aspS	aspartyl-tRNA synthetase
1.56097e+07	Rv2573	-	2-dehydropantoate 2-reductase
1.56097e+07	Rv2574	-	hypothetical protein Rv2574
1.56097e+07	Rv2580c	hisS	histidyl-tRNA synthetase
1.56097e+07	Rv2581c	-	glyoxalase II
1.56097e+07	Rv2584c	apt	adenine phosphoribosyltransferase
1.56097e+07	Rv2585c	-	lipoprotein
1.56097e+07	Rv2589	gabT	4-aminobutyrate aminotransferase
1.56097e+07	Rv2592c	ruvB	Holliday junction DNA helicase B
1.56097e+07	Rv2593c	ruvA	Holliday junction DNA helicase motor protein
1.56097e+07	Rv2594c	ruvC	Holliday junction resolvase
1.56097e+07	Rv2596	-	hypothetical protein Rv2596
1.56097e+07	Rv2602	-	hypothetical protein Rv2602
1.56097e+07	Rv2603c	-	hypothetical protein Rv2603c
1.56097e+07	Rv2604c	snoP	probable glutamine amidotransferase snop
1.56097e+07	Rv2605c	tesB2	acyl-CoA thioesterase II
1.56097e+07	Rv2606c	snzP	possible pyridoxine biosynthesis protein snzp
1.56097e+07	Rv2607	pdxH	pyridoxamine 5'-phosphate oxidase
1.56097e+07	Rv2610c	pimA	alpha-mannosyltransferase PIMA
1.56098e+07	Rv2614c	thrS	threonyl-tRNA synthetase
1.56098e+07	Rv2619c	-	hypothetical protein Rv2619c
1.56098e+07	Rv2626c	hrp1	hypoxic response protein 1 hrp1
1.56098e+07	Rv2629	-	hypothetical protein Rv2629
1.56098e+07	Rv2632c	-	hypothetical protein Rv2632c
1.56098e+07	Rv2636	-	hypothetical protein Rv2636
1.56098e+07	Rv2638	-	hypothetical protein Rv2638
1.56098e+07	Rv2640c	-	ArsR family transcriptional regulator
1.56098e+07	Rv2641	cadI	cadmium inducible protein CADI
1.56098e+07	Rv2642	-	ArsR family transcriptional regulator
1.56098e+07	Rv2669	-	hypothetical protein Rv2669
1.56098e+07	Rv2671	ribD	hypothetical protein Rv2671
1.56098e+07	Rv2674	msrB	probable peptide methionine sulfoxide reductase msrb (protein-methionine-r-oxide reductase) (peptide met(o) reductase)
1.56098e+07	Rv2675c	-	hypothetical protein Rv2675c
1.56098e+07	Rv2676c	-	hypothetical protein Rv2676c
1.56098e+07	Rv2678c	hemE	uroporphyrinogen decarboxylase
1.56098e+07	Rv2679	echA15	enoyl-CoA hydratase
1.56098e+07	Rv2681	-	hypothetical protein Rv2681
1.56098e+07	Rv2688c	-	antibiotic ABC transporter ATP-binding protein
1.56098e+07	Rv2689c	-	hypothetical protein Rv2689c
1.56098e+07	Rv2694c	-	hypothetical protein Rv2694c
1.56098e+07	Rv2695	-	hypothetical protein Rv2695
1.56098e+07	Rv2697c	dut	deoxyuridine 5'-triphosphate nucleotidohydrolase
1.56098e+07	Rv2701c	suhB	extragenic suppressor protein SuhB
1.56098e+07	Rv2702	ppgK	polyphosphate glucokinase PPGK (polyphosphate-glucose phosphotransferase)
1.56098e+07	Rv2704	-	hypothetical protein Rv2704
1.56098e+07	Rv2710	sigB	RNA polymerase sigma factor SigB
1.56098e+07	Rv2711	ideR	IRON-dependent repressor and activator IDER
1.56099e+07	Rv2713	sthA	soluble pyridine nucleotide transhydrogenase
1.56099e+07	Rv2715	-	hydrolase
1.56099e+07	Rv2716	-	hypothetical protein Rv2716
1.56099e+07	Rv2717c	-	hypothetical protein Rv2717c
1.56099e+07	Rv2720	lexA	LexA repressor
1.56099e+07	Rv2724c	fadE20	acyl-CoA dehydrogenase FADE20
1.56099e+07	Rv2726c	dapF	diaminopimelate epimerase
1.56099e+07	Rv2729c	-	hypothetical protein Rv2729c
1.56099e+07	Rv2737c	recA	recombinase A
1.56099e+07	Rv2739c	-	alanine rich transferase
1.56099e+07	Rv2740	ephG	epoxide hydrolase
1.56099e+07	Rv2745c	-	transcriptional regulatory protein
1.56099e+07	Rv2749	-	hypothetical protein Rv2749
1.56099e+07	Rv2750	-	3-ketoacyl-(acyl-carrier-protein) reductase
1.56099e+07	Rv2753c	dapA	dihydrodipicolinate synthase
1.56099e+07	Rv2754c	thyX	FAD-dependent thymidylate synthase
1.56099e+07	Rv2757c	vapC21	possible toxin vapc21
1.56099e+07	Rv2759c	-	hypothetical protein Rv2759c
1.56099e+07	Rv2761c	hsdS	type I restriction/modification system specificity determinant HsdS
1.56099e+07	Rv2763c	dfrA	dihydrofolate reductase DFRA (DHFR) (tetrahydrofolate dehydrogenase)
1.56099e+07	Rv2764c	thyA	thymidylate synthase
1.56099e+07	Rv2765	-	hypothetical protein Rv2765
1.56099e+07	Rv2771c	-	hypothetical protein Rv2771c
1.56099e+07	Rv2773c	dapB	dihydrodipicolinate reductase
1.56099e+07	Rv2775	-	hypothetical protein Rv2775
1.56099e+07	Rv2776c	-	oxidoreductase
1.56099e+07	Rv2778c	-	hypothetical protein Rv2778c
1.56099e+07	Rv2780	ald	secreted L-alanine dehydrogenase ALD (40 kDa antigen) (TB43)
1.56099e+07	Rv2781c	-	alanine rich oxidoreductase
1.56099e+07	Rv2782c	pepR	zinc protease PEPR
1.56099e+07	Rv2783c	gpsI	polynucleotide phosphorylase/polyadenylase
1.56099e+07	Rv2785c	rpsO	30S ribosomal protein S15
1.56099e+07	Rv2786c	ribF	bifunctional riboflavin kinase/FMN adenylyltransferase
1.56099e+07	Rv2788	sirR	transcriptional repressor SIRR
1.56099e+07	Rv2789c	fadE21	acyl-CoA dehydrogenase FADE21
1.56099e+07	Rv2790c	ltp1	lipid-transfer protein
1.56099e+07	Rv2793c	truB	tRNA pseudouridine synthase B
1.56099e+07	Rv2800	-	hydrolase
1.56099e+07	Rv2801c	mazF9	sequence-specific mrna cleavage
1.561e+07	Rv2813	-	hypothetical protein Rv2813
1.561e+07	Rv2816c	-	hypothetical protein Rv2816c
1.561e+07	Rv2827c	-	hypothetical protein Rv2827c
1.561e+07	Rv2829c	vapC22	possible toxin vapc22
1.561e+07	Rv2831	echA16	enoyl-CoA hydratase
1.561e+07	Rv2832c	ugpC	sn-glycerol-3-phosphate transport ATP-binding protein ABC transporter UGPC
1.561e+07	Rv2833c	ugpB	sn-glycerol-3-phosphate-binding lipoprotein UGPB
1.561e+07	Rv2837c	-	hypothetical protein Rv2837c
1.561e+07	Rv2841c	nusA	transcription elongation factor NusA
1.561e+07	Rv2850c	-	magnesium chelatase
1.561e+07	Rv2851c	-	hypothetical protein Rv2851c
1.561e+07	Rv2857c	-	short chain dehydrogenase
1.561e+07	Rv2858c	aldC	aldehyde dehydrogenase
1.561e+07	Rv2860c	glnA4	glutamine synthetase
1.561e+07	Rv2863	vapC23	possible toxin vapc23
1.561e+07	Rv2865	relB2	function unknown
1.561e+07	Rv2866	relE2	function unknown
1.561e+07	Rv2867c	-	hypothetical protein Rv2867c
1.561e+07	Rv2872	-	hypothetical protein Rv2872
1.561e+07	Rv2873	mpt83	cell surface lipoprotein mpt83 (lipoprotein P23)
1.561e+07	Rv2875	mpt70	major secreted immunogenic protein MPT70
1.561e+07	Rv2878c	mpt53	soluble secreted antigen MPT53 precursor
1.561e+07	Rv2882c	frr	ribosome recycling factor
1.561e+07	Rv2883c	pyrH	uridylate kinase
1.561e+07	Rv2884	-	transcriptional regulatory protein
1.561e+07	Rv2887	-	transcriptional regulatory protein
1.561e+07	Rv2888c	amiC	amidase
1.561e+07	Rv2889c	tsf	elongation factor Ts
1.561e+07	Rv2890c	rpsB	30S ribosomal protein S2
1.561e+07	Rv2893	-	oxidoreductase
1.561e+07	Rv2894c	xerC	site-specific tyrosine recombinase XerC
1.561e+07	Rv2895c	viuB	mycobactin utilization protein ViuB
1.561e+07	Rv2902c	rnhB	ribonuclease HII
1.561e+07	Rv2904c	rplS	50S ribosomal protein L19
1.561e+07	Rv2906c	trmD	tRNA (guanine-N(1)-)-methyltransferase
1.561e+07	Rv2907c	rimM	16S rRNA-processing protein
1.561e+07	Rv2908c	-	hypothetical protein Rv2908c
1.561e+07	Rv2909c	rpsP	30S ribosomal protein S16
1.561e+07	Rv2910c	-	hypothetical protein Rv2910c
1.561e+07	Rv2912c	-	TetR family transcriptional regulator
1.56101e+07	Rv2916c	ffh	signal recognition particle protein
1.56101e+07	Rv2919c	glnB	nitrogen regulatory protein P-II GLNB
1.56101e+07	Rv2920c	amt	ammonium transporter
1.56101e+07	Rv2921c	ftsY	cell division protein FtsY
1.56101e+07	Rv2923c	-	hypothetical protein Rv2923c
1.56101e+07	Rv2924c	fpg	formamidopyrimidine-DNA glycosylase
1.56101e+07	Rv2925c	rnc	ribonuclease III
1.56101e+07	Rv2928	tesA	thioesterase TESA
1.56101e+07	Rv2933	ppsC	phenolpthiocerol synthesis type-I polyketide synthase PPSC
1.56101e+07	Rv2936	drrA	daunorubicin-DIM-transport ATP-binding protein ABC transporter DrrA
1.56101e+07	Rv2939	papA5	acyltransferase PapA5
1.56101e+07	Rv2941	fadD28	acyl-CoA synthetase
1.56101e+07	Rv2945c	lppX	lipoprotein LppX
1.56101e+07	Rv2947c	pks15	polyketide synthase PKS15
1.56101e+07	Rv2950c	fadD29	acyl-CoA synthase
1.56101e+07	Rv2951c	-	oxidoreductase
1.56101e+07	Rv2958c	-	glycosyl transferase
1.56101e+07	Rv2962c	-	glycosyl transferase
1.56101e+07	Rv2964	purU	formyltetrahydrofolate deformylase
1.56101e+07	Rv2965c	coaD	phosphopantetheine adenylyltransferase
1.56101e+07	Rv2966c	-	methyltransferase (methylase)
1.56101e+07	Rv2970c	lipN	lipase/esterase LipN
1.56101e+07	Rv2971	-	oxidoreductase
1.56101e+07	Rv2973c	recG	ATP-dependent DNA helicase RECG
1.56101e+07	Rv2975c	-	hypothetical protein Rv2975c
1.56101e+07	Rv2976c	ung	uracil-DNA glycosylase
1.56101e+07	Rv2977c	thiL	thiamine monophosphate kinase
1.56101e+07	Rv2981c	ddl	D-alanyl-alanine synthetase A
1.56101e+07	Rv2982c	gpsA	NAD(P)H-dependent glycerol-3-phosphate dehydrogenase
1.56101e+07	Rv2983	-	hypothetical protein Rv2983
1.56101e+07	Rv2984	ppk	polyphosphate kinase
1.56101e+07	Rv2987c	leuD	isopropylmalate isomerase small subunit
1.56101e+07	Rv2988c	leuC	isopropylmalate isomerase large subunit
1.56101e+07	Rv2989	-	transcriptional regulatory protein
1.56101e+07	Rv2991	-	hypothetical protein Rv2991
1.56101e+07	Rv2993c	-	2-hydroxyhepta-2,4-diene-1,7-dioate isomerase
1.56101e+07	Rv2994	-	integral membrane protein
1.56101e+07	Rv2995c	leuB	3-isopropylmalate dehydrogenase
1.56101e+07	Rv3000	-	transmembrane protein
1.56101e+07	Rv3001c	ilvC	ketol-acid reductoisomerase
1.56101e+07	Rv3002c	ilvH	acetolactate synthase 3 regulatory subunit
1.56101e+07	Rv3009c	gatB	aspartyl/glutamyl-tRNA amidotransferase subunit B
1.56101e+07	Rv3010c	pfkA	6-phosphofructokinase
1.56101e+07	Rv3011c	gatA	aspartyl/glutamyl-tRNA amidotransferase subunit A
1.56101e+07	Rv3012c	gatC	aspartyl/glutamyl-tRNA amidotransferase subunit C
1.56102e+07	Rv3014c	ligA	NAD-dependent DNA ligase LigA
1.56102e+07	Rv3019c	esxR	secreted ESAT-6 like protein ESXR (TB10.3) (ESAT-6 like protein 9)
1.56102e+07	Rv3025c	iscS	cysteine desulfurase IscS
1.56102e+07	Rv3028c	fixB	electron transfer flavoprotein subunit alpha
1.56102e+07	Rv3029c	fixA	electron transfer flavoprotein subunit beta
1.56102e+07	Rv3031	-	hypothetical protein Rv3031
1.56102e+07	Rv3032	-	transferase
1.56102e+07	Rv3039c	echA17	enoyl-CoA hydratase
1.56102e+07	Rv3041c	-	ABC transporter ATP-binding protein
1.56102e+07	Rv3042c	serB2	phosphoserine phosphatase
1.56102e+07	Rv3043c	ctaD	cytochrome C oxidase polypeptide I
1.56102e+07	Rv3045	adhC	NADP-dependent alcohol dehydrogenase ADHC
1.56102e+07	Rv3050c	-	AsnC family transcriptional regulator
1.56102e+07	Rv3051c	nrdE	ribonucleotide-diphosphate reductase subunit alpha
1.56102e+07	Rv3052c	nrdI	ribonucleotide reductase stimulatory protein
1.56102e+07	Rv3053c	nrdH	glutaredoxin electron transport protein NrdH
1.56102e+07	Rv3054c	-	hypothetical protein Rv3054c
1.56102e+07	Rv3055	-	TetR family transcriptional regulator
1.56102e+07	Rv3056	dinP	DNA polymerase IV
1.56102e+07	Rv3057c	-	short chain dehydrogenase
1.56102e+07	Rv3058c	-	TetR family transcriptional regulator
1.56102e+07	Rv3059	cyp136	cytochrome P450 136
1.56102e+07	Rv3062	ligB	ATP-dependent DNA ligase
1.56102e+07	Rv3066	-	DeoR family transcriptional regulator
1.56102e+07	Rv3068c	pgmA	phosphoglucomutase
1.56102e+07	Rv3075c	-	hypothetical protein Rv3075c
1.56102e+07	Rv3076	-	hypothetical protein Rv3076
1.56102e+07	Rv3079c	-	hypothetical protein Rv3079c
1.56102e+07	Rv3084	lipR	acetyl-hydrolase/esterase LipR
1.56102e+07	Rv3085	-	short-chain type dehydrogenase/reductase
1.56102e+07	Rv3086	adhD	zinc-type alcohol dehydrogenase AdhD
1.56102e+07	Rv3089	fadD13	chain-fatty-acid-CoA ligase
1.56102e+07	Rv3093c	-	oxidoreductase
1.56102e+07	Rv3094c	-	hypothetical protein Rv3094c
1.56102e+07	Rv3095	-	putative transcriptional regulatory protein
1.56102e+07	Rv3100c	smpB	SsrA-binding protein
1.56102e+07	Rv3102c	ftsE	putative cell division ATP-binding protein FTSE (septation component-transport ATP-binding protein ABC transporter)
1.56102e+07	Rv3105c	prfB	peptide chain release factor 2
1.56102e+07	Rv3106	fprA	NADPH:adrenodoxin oxidoreductase FPRA (NADPH-ferredoxin reductase)
1.56103e+07	Rv3113	-	phosphatase
1.56103e+07	Rv3114	-	hypothetical protein Rv3114
1.56103e+07	Rv3121	cyp141	cytochrome P450 141
1.56103e+07	Rv3124	-	transcriptional regulatory protein
1.56103e+07	Rv3133c	devR	two component transcriptional regulatory protein DevR
1.56103e+07	Rv3137	-	monophosphatase
1.56103e+07	Rv3139	fadE24	acyl-CoA dehydrogenase FADE24
1.56103e+07	Rv3140	fadE23	acyl-CoA dehydrogenase FADE23
1.56103e+07	Rv3141	fadB4	NADPH quinone oxidoreductase
1.56103e+07	Rv3143	-	response regulator
1.56103e+07	Rv3146	nuoB	NADH dehydrogenase subunit B
1.56103e+07	Rv3148	nuoD	NADH dehydrogenase subunit D
1.56103e+07	Rv3150	nuoF	NADH dehydrogenase I chain F
1.56103e+07	Rv3151	nuoG	NADH dehydrogenase subunit G
1.56103e+07	Rv3153	nuoI	NADH dehydrogenase subunit I
1.56103e+07	Rv3160c	-	TetR family transcriptional regulator
1.56103e+07	Rv3161c	-	dioxygenase
1.56103e+07	Rv3167c	-	TetR family transcriptional regulator
1.56103e+07	Rv3170	aofH	flavin-containing monoamine oxidase
1.56103e+07	Rv3171c	hpx	non-Heme haloperoxidase Hpx
1.56103e+07	Rv3173c	-	TetR/ACRR family transcriptional regulator
1.56103e+07	Rv3174	-	short chain dehydrogenase
1.56103e+07	Rv3175	-	amidase
1.56103e+07	Rv3177	-	peroxidase
1.56103e+07	Rv3180c	-	hypothetical protein Rv3180c
1.56103e+07	Rv3183	-	transcriptional regulatory protein
1.56103e+07	Rv3192	-	hypothetical protein Rv3192
1.56103e+07	Rv3198c	uvrD2	ATP-dependent DNA helicase II UVRD2
1.56103e+07	Rv3200c	-	transmembrane cation transporter
1.56103e+07	Rv3203	lipV	lipase LipV
1.56103e+07	Rv3204	-	DNA-methyltransferase (modification methylase)
1.56103e+07	Rv3208	-	TetR family transcriptional regulator
1.56103e+07	Rv3213c	-	SOJ/PARA-like protein
1.56104e+07	Rv3215	entC	isochorismate synthase
1.56104e+07	Rv3216	-	acetyltransferase
1.56104e+07	Rv3221c	TB7.3	putative acetyl-CoA carboxylase biotin carboxyl carrier protein subunit
1.56104e+07	Rv3223c	sigH	RNA polymerase sigma factor RpoE
1.56104e+07	Rv3224	-	short chain dehydrogenase
1.56104e+07	Rv3226c	-	hypothetical protein Rv3226c
1.56104e+07	Rv3227	aroA	3-phosphoshikimate 1-carboxyvinyltransferase
1.56104e+07	Rv3230c	-	oxidoreductase
1.56104e+07	Rv3237c	-	hypothetical protein Rv3237c
1.56104e+07	Rv3246c	mtrA	two component sensory transduction transcriptional regulatory protein MTRA
1.56104e+07	Rv3247c	tmk	thymidylate kinase
1.56104e+07	Rv3248c	sahH	S-adenosyl-L-homocysteine hydrolase
1.56104e+07	Rv3249c	-	TetR family transcriptional regulator
1.56104e+07	Rv3250c	rubB	rubredoxin RubB
1.56104e+07	Rv3251c	rubA	rubredoxin RUBA
1.56104e+07	Rv3255c	manA	mannose-6-phosphate isomerase
1.56104e+07	Rv3257c	manB	phosphomannomutase/phosphoglucomutase
1.56104e+07	Rv3261	fbiA	LPPG:FO 2-phospho-L-lactate transferase
1.56104e+07	Rv3266c	rmlD	dTDP-6-deoxy-L-lyxo-4-hexulose reductase RmlD
1.56104e+07	Rv3268	-	hypothetical protein Rv3268
1.56104e+07	Rv3272	-	hypothetical protein Rv3272
1.56104e+07	Rv3274c	fadE25	acyl-CoA dehydrogenase FADE25
1.56104e+07	Rv3275c	purE	phosphoribosylaminoimidazole carboxylase catalytic subunit
1.56104e+07	Rv3276c	purK	phosphoribosylaminoimidazole carboxylase ATPase subunit
1.56104e+07	Rv3279c	birA	biotin--protein ligase
1.56104e+07	Rv3280	accD5	propionyl-CoA carboxylase beta chain
1.56104e+07	Rv3282	maf	Maf-like protein
1.56104e+07	Rv3283	sseA	thiosulfate sulfurtransferase SseA
1.56104e+07	Rv3284	-	hypothetical protein Rv3284
1.56104e+07	Rv3285	accA3	bifunctional acetyl-/propionyl-coenzyme A carboxylase subunit alpha
1.56104e+07	Rv3286c	sigF	RNA polymerase sigma factor SigF
1.56104e+07	Rv3290c	lat	L-lysine aminotransferase
1.56104e+07	Rv3291c	lrpA	probable transcriptional regulatory protein lrpa (lrp/asnc-family)
1.56104e+07	Rv3295	-	TetR family transcriptional regulator
1.56104e+07	Rv3297	nei	endonuclease VIII
1.56104e+07	Rv3301c	phoY1	phosphate transporter PhoU
1.56104e+07	Rv3303c	lpdA	flavoprotein disulfide reductase
1.56104e+07	Rv3307	deoD	purine nucleoside phosphorylase
1.56104e+07	Rv3308	pmmB	phosphomannomutase
1.56104e+07	Rv3309c	upp	uracil phosphoribosyltransferase
1.56104e+07	Rv3312c	-	hypothetical protein Rv3312c
1.56104e+07	Rv3313c	add	adenosine deaminase
1.56105e+07	Rv3314c	deoA	thymidine phosphorylase
1.56105e+07	Rv3315c	cdd	cytidine deaminase
1.56105e+07	Rv3316	sdhC	succinate dehydrogenase cytochrome B-556 subunit
1.56105e+07	Rv3317	sdhD	succinate dehydrogenase hydrophobic membrane anchor subunit SdhD
1.56105e+07	Rv3318	sdhA	succinate dehydrogenase flavoprotein subunit
1.56105e+07	Rv3319	sdhB	succinate dehydrogenase iron-sulfur subunit
1.56105e+07	Rv3324c	moaC	molybdenum cofactor biosynthesis protein C
1.56105e+07	Rv3329	-	hypothetical protein Rv3329
1.56105e+07	Rv3330	dacB1	penicillin-binding protein DacB1
1.56105e+07	Rv3332	nagA	N-acetylglucosamine-6-phosphate deacetylase
1.56105e+07	Rv3334	-	MerR family transcriptional regulator
1.56105e+07	Rv3336c	trpS	tryptophanyl-tRNA synthetase
1.56105e+07	Rv3338	-	hypothetical protein Rv3338
1.56105e+07	Rv3339c	icd1	isocitrate dehydrogenase
1.56105e+07	Rv3340	metC	O-acetylhomoserine aminocarboxypropyltransferase
1.56105e+07	Rv3341	metX	homoserine O-acetyltransferase
1.56105e+07	Rv3342	-	methyltransferase (methylase)
1.56105e+07	Rv3352c	-	oxidoreductase
1.56105e+07	Rv3356c	folD	bifunctional methylenetetrahydrofolate dehydrogenase/methenyltetrahydrofolate cyclohydrolase
1.56105e+07	Rv3357	relB3	function unknown
1.56105e+07	Rv3358	relE3	function unknown
1.56105e+07	Rv3359	-	oxidoreductase
1.56105e+07	Rv3360	-	hypothetical protein Rv3360
1.56105e+07	Rv3361c	-	hypothetical protein Rv3361c
1.56105e+07	Rv3362c	-	ATP/GTP-binding protein
1.56105e+07	Rv3364c	-	hypothetical protein Rv3364c
1.56105e+07	Rv3366	spoU	tRNA/rRNA methylase SpoU
1.56105e+07	Rv3368c	-	oxidoreductase
1.56105e+07	Rv3369	-	hypothetical protein Rv3369
1.56105e+07	Rv3373	echA18	enoyl-CoA hydratase
1.56105e+07	Rv3375	amiD	amidase AmiD
1.56105e+07	Rv3376	-	hypothetical protein Rv3376
1.56105e+07	Rv3383c	idsB	polyprenyl synthetase IdsB
1.56105e+07	Rv3384c	-	hypothetical protein Rv3384c
1.56105e+07	Rv3389c	htdY	probable 3-hydroxyacyl-thioester dehydratase htdy
1.56105e+07	Rv3390	lpqD	lipoprotein LpqD
1.56105e+07	Rv3392c	cmaA1	cyclopropane-fatty-acyl-phospholipid synthase 1 CMAA1 (cyclopropane fatty acid synthase) (CFA synthase) (cyclopropane mycolic acid synthase 1)
1.56105e+07	Rv3393	iunH	nucleoside hydrolase IunH
1.56105e+07	Rv3396c	guaA	bifunctional GMP synthase/glutamine amidotransferase protein
1.56105e+07	Rv3397c	phyA	phytoene synthase
1.56105e+07	Rv3400	-	hydrolase
1.56105e+07	Rv3401	-	hypothetical protein Rv3401
1.56105e+07	Rv3402c	-	hypothetical protein Rv3402c
1.56105e+07	Rv3404c	-	hypothetical protein Rv3404c
1.56105e+07	Rv3405c	-	transcriptional regulatory protein
1.56105e+07	Rv3406	-	dioxygenase
1.56105e+07	Rv3408	-	hypothetical protein Rv3408
1.56105e+07	Rv3410c	guaB3	inositol-5-monophosphate dehydrogenase
1.56105e+07	Rv3411c	guaB2	inositol-5-monophosphate dehydrogenase
1.56106e+07	Rv3414c	sigD	RNA polymerase sigma factor SigD
1.56106e+07	Rv3417c	groEL	chaperonin GroEL
1.56106e+07	Rv3418c	groES	co-chaperonin GroES
1.56106e+07	Rv3420c	rimI	ribosomal-protein-alanine acetyltransferase
1.56106e+07	Rv3421c	-	hypothetical protein Rv3421c
1.56106e+07	Rv3422c	-	hypothetical protein Rv3422c
1.56106e+07	Rv3423c	alr	alanine racemase
1.56106e+07	Rv3432c	gadB	glutamate decarboxylase GadB
1.56106e+07	Rv3433c	-	hypothetical protein Rv3433c
1.56106e+07	Rv3436c	glmS	D-fructose-6-phosphate amidotransferase
1.56106e+07	Rv3441c	mrsA	phospho-sugar mutase / MRSA protein
1.56106e+07	Rv3442c	rpsI	30S ribosomal protein S9
1.56106e+07	Rv3443c	rplM	50S ribosomal protein L13
1.56106e+07	Rv3444c	esxT	putative ESAT-6 like protein ESXT
1.56106e+07	Rv3449	mycP4	membrane-anchored mycosin
1.56106e+07	Rv3452	cut4	cutinase precursor CUT4
1.56106e+07	Rv3455c	truA	tRNA pseudouridine synthase A
1.56106e+07	Rv3456c	rplQ	50S ribosomal protein L17
1.56106e+07	Rv3457c	rpoA	DNA-directed RNA polymerase subunit alpha
1.56106e+07	Rv3458c	rpsD	30S ribosomal protein S4
1.56106e+07	Rv3459c	rpsK	30S ribosomal protein S11
1.56106e+07	Rv3460c	rpsM	30S ribosomal protein S13
1.56106e+07	Rv3461c	rpmJ	50S ribosomal protein L36
1.56106e+07	Rv3462c	infA	translation initiation factor IF-1
1.56106e+07	Rv3464	rmlB	dTDP-glucose 4,6-dehydratase RMLB
1.56106e+07	Rv3465	rmlC	dTDP-4-dehydrorhamnose 3,5-epimerase RmlC
1.56106e+07	Rv3469c	mhpE	4-hydroxy-2-ketovalerate aldolase
1.56106e+07	Rv3470c	ilvB2	acetolactate synthase large subunit
1.56106e+07	Rv3473c	bpoA	peroxidase BpoA
1.56106e+07	Rv3476c	kgtP	dicarboxylic acid transport integral membrane protein KgtP
1.56106e+07	Rv3485c	-	short chain dehydrogenase
1.56106e+07	Rv3487c	lipF	esterase/lipase LipF
1.56106e+07	Rv3488	-	hypothetical protein Rv3488
1.56106e+07	Rv3490	otsA	alpha,alpha-trehalose-phosphate synthase
1.56106e+07	Rv3502c	fabG	3-ketoacyl-(acyl-carrier-protein) reductase
1.56106e+07	Rv3503c	fdxD	ferredoxin FdxD
1.56106e+07	Rv3504	fadE26	acyl-CoA dehydrogenase FADE26
1.56106e+07	Rv3505	fadE27	acyl-CoA dehydrogenase FADE27
1.56106e+07	Rv3506	fadD17	acyl-CoA synthetase
1.56106e+07	Rv3509c	ilvX	hypothetical protein Rv3509c
1.56106e+07	Rv3510c	-	hypothetical protein Rv3510c
1.56106e+07	Rv3513c	fadD18	fatty-acid-CoA ligase
1.56107e+07	Rv3516	echA19	enoyl-CoA hydratase
1.56107e+07	Rv3518c	cyp142	cytochrome P450 monooxygenase 142
1.56107e+07	Rv3520c	-	coenzyme F420-dependent oxidoreductase
1.56107e+07	Rv3522	ltp4	lipid-transfer protein
1.56107e+07	Rv3524	-	hypothetical protein Rv3524
1.56107e+07	Rv3525c	-	siderophore-binding protein
1.56107e+07	Rv3530c	-	short chain dehydrogenase
1.56107e+07	Rv3534c	hsaF	probable 4-hydroxy-2-oxovalerate aldolase (hoa)
1.56107e+07	Rv3535c	hsaG	probable acetaldehyde dehydrogenase (acetaldehyde dehydrogenase [acetylating])
1.56107e+07	Rv3536c	hsaE	probable hydratase
1.56107e+07	Rv3541c	-	hypothetical protein Rv3541c
1.56107e+07	Rv3543c	fadE29	acyl-CoA dehydrogenase FADE29
1.56107e+07	Rv3544c	fadE28	acyl-CoA dehydrogenase FADE28
1.56107e+07	Rv3545c	cyp125	cytochrome P450 125
1.56107e+07	Rv3546	fadA5	acetyl-CoA acetyltransferase
1.56107e+07	Rv3548c	-	short chain dehydrogenase
1.56107e+07	Rv3549c	-	short chain dehydrogenase
1.56107e+07	Rv3550	echA20	enoyl-CoA hydratase
1.56107e+07	Rv3551	-	CoA-transferase subunit alpha
1.56107e+07	Rv3552	-	CoA-transferase subunit beta
1.56107e+07	Rv3553	-	oxidoreductase
1.56107e+07	Rv3556c	fadA6	acetyl-CoA acetyltransferase
1.56107e+07	Rv3557c	-	TetR family transcriptional regulator
1.56107e+07	Rv3559c	-	short chain dehydrogenase
1.56107e+07	Rv3560c	fadE30	acyl-CoA dehydrogenase FADE30
1.56107e+07	Rv3561	fadD3	acyl-CoA synthetase
1.56107e+07	Rv3562	fadE31	acyl-CoA dehydrogenase FADE31
1.56107e+07	Rv3563	fadE32	acyl-CoA dehydrogenase FADE32
1.56107e+07	Rv3564	fadE33	acyl-CoA dehydrogenase FADE33
1.56107e+07	Rv3565	aspB	aspartate aminotransferase
1.56107e+07	Rv3567c	hsaB	possible oxidoreductase. possible 3-hydroxy-9,10-seconandrost-1,3,5(10)-triene-9,17-dione hydroxylase.
1.56107e+07	Rv3568c	bphC	biphenyl-2,3-diol 1,2-dioxygenase
1.56107e+07	Rv3569c	bphD	2-hydroxy-6-oxo-6-phenylhexa-2,4-dienoate hydrolase BphD
1.56107e+07	Rv3570c	hsaA	possible oxidoreductase. possible 3-hydroxy-9,10-seconandrost-1,3,5(10)-triene-9,17-dione hydroxylase.
1.56107e+07	Rv3571	hmp	hemoglobine-like protein
1.56107e+07	Rv3574	kstR	involved in transcriptional mechanism. predicted to control regulon involved in lipid metabolism
1.56107e+07	Rv3579c	-	tRNA/rRNA methyltransferase
1.56107e+07	Rv3581c	ispF	2-C-methyl-D-erythritol 2,4-cyclodiphosphate synthase
1.56107e+07	Rv3582c	ispD	2-C-methyl-D-erythritol 4-phosphate cytidylyltransferase
1.56107e+07	Rv3588c	canB	beta-carbonic anhydrase canb
1.56107e+07	Rv3589	mutY	adenine glycosylase MutY
1.56107e+07	Rv3591c	-	hydrolase
1.56107e+07	Rv3592	TB11.2	hypothetical protein Rv3592
1.56107e+07	Rv3598c	lysS	lysyl-tRNA synthetase
1.56107e+07	Rv3600c	-	pantothenate kinase
1.56107e+07	Rv3601c	panD	aspartate alpha-decarboxylase
1.56107e+07	Rv3602c	panC	pantoate--beta-alanine ligase
1.56107e+07	Rv3606c	folK	2-amino-4-hydroxy-6-hydroxymethyldihydropteridi ne pyrophosphokinase FolK
1.56107e+07	Rv3609c	folE	GTP cyclohydrolase I
1.56107e+07	Rv3610c	ftsH	membrane-bound protease FTSH (cell division protein)
1.56108e+07	Rv3617	ephA	epoxide hydrolase EphA
1.56108e+07	Rv3618	-	monooxygenase
1.56108e+07	Rv3620c	esxW	putative ESAT-6 like protein ESXW (ESAT-6 like protein 10)
1.56108e+07	Rv3624c	hpt	hypoxanthine-guanine phosphoribosyltransferase
1.56108e+07	Rv3625c	mesJ	cell cycle protein MESJ
1.56108e+07	Rv3628	ppa	inorganic pyrophosphatase
1.56108e+07	Rv3644c	-	DNA polymerase III subunit delta'
1.56108e+07	Rv3646c	topA	DNA topoisomerase I
1.56108e+07	Rv3648c	cspA	cold shock protein A
1.56108e+07	Rv3666c	dppA	periplasmic dipeptide-binding lipoprotein DppA
1.56108e+07	Rv3667	acs	acetyl-CoA synthetase
1.56108e+07	Rv3670	ephE	epoxide hydrolase EphE
1.56108e+07	Rv3676	-	CRP/FNR family transcriptional regulator
1.56108e+07	Rv3677c	-	hydrolase
1.56108e+07	Rv3678c	-	hypothetical protein Rv3678c
1.56108e+07	Rv3679	-	anion transporter ATPase
1.56108e+07	Rv3684	-	lyase
1.56108e+07	Rv3685c	cyp137	cytochrome P450 137
1.56108e+07	Rv3687c	rsfB	anti-anti-sigma factor RSFB (anti-sigma factor antagonist) (regulator of sigma F B)
1.56108e+07	Rv3688c	-	hypothetical protein Rv3688c
1.56108e+07	Rv3696c	glpK	glycerol kinase
1.56108e+07	Rv3697c	-	hypothetical protein Rv3697c
1.56108e+07	Rv3699	-	hypothetical protein Rv3699
1.56108e+07	Rv3700c	-	hypothetical protein Rv3700c
1.56108e+07	Rv3702c	-	hypothetical protein Rv3702c
1.56108e+07	Rv3704c	gshA	glutamate--cysteine ligase gshA (gamma-glutamylcysteine synthetase) (gamma-ECS) (GCS) (gamma-glutamyl-L-cysteine synthetase)
1.56108e+07	Rv3708c	asd	aspartate-semialdehyde dehydrogenase
1.56108e+07	Rv3709c	ask	aspartate kinase
1.56108e+07	Rv3710	leuA	2-isopropylmalate synthase
1.56108e+07	Rv3712	-	ligase
1.56108e+07	Rv3713	cobQ2	cobyric acid synthase CobQ2
1.56109e+07	Rv3715c	recR	recombination protein RecR
1.56109e+07	Rv3716c	-	hypothetical protein Rv3716c
1.56109e+07	Rv3718c	-	hypothetical protein Rv3718c
1.56109e+07	Rv3719	-	hypothetical protein Rv3719
1.56109e+07	Rv3725	-	oxidoreductase
1.56109e+07	Rv3726	-	dehydrogenase
1.56109e+07	Rv3730c	-	hypothetical protein Rv3730c
1.56109e+07	Rv3731	ligC	ATP-dependent DNA ligase
1.56109e+07	Rv3733c	-	hypothetical protein Rv3733c
1.56109e+07	Rv3735	-	hypothetical protein Rv3735
1.56109e+07	Rv3744	nmtR	metal sensor transcriptional regulator (arsr-smtb family)
1.56109e+07	Rv3751	-	integrase
1.56109e+07	Rv3752c	-	cytidine/deoxycytidylate deaminase
1.56109e+07	Rv3755c	-	hypothetical protein Rv3755c
1.56109e+07	Rv3758c	proV	osmoprotectant (glycine betaine/carnitine/choline/L-proline) transport ATP-binding protein ABC transporter PROV
1.56109e+07	Rv3759c	proX	osmoprotectant (glycine betaine/carnitine/choline/L-proline) binding lipoprotein PROX
1.56109e+07	Rv3762c	-	hydrolase
1.56109e+07	Rv3765c	tcrX	probable two component transcriptional regulatory protein tcrx
1.56109e+07	Rv3768	-	hypothetical protein Rv3768
1.56109e+07	Rv3772	hisC2	putative aminotransferase
1.56109e+07	Rv3774	echA21	enoyl-CoA hydratase
1.56109e+07	Rv3775	lipE	lipase LipE
1.56109e+07	Rv3777	-	oxidoreductase
1.56109e+07	Rv3778c	-	aminotransferase
1.56109e+07	Rv3781	rfbE	o-antigen/lipopolysaccharide transport ATP-binding protein ABC transporter RfbE
1.56109e+07	Rv3788	-	nucleoside diphosphate kinase regulator
1.56109e+07	Rv3790	dprE1	decaprenylphosphoryl-beta-d-ribose 2'-oxidase
1.56109e+07	Rv3791	dprE2	decaprenylphosphoryl-d-2-keto erythro pentose reductase
1.56109e+07	Rv3804c	fbpA	secreted antigen 85-A FBPA (Mycolyl transferase 85A) (fibronectin-binding protein A) (antigen 85 complex A)
1.56109e+07	Rv3807c	-	transmembrane protein
1.56109e+07	Rv3809c	glf	UDP-galactopyranose mutase Glf
1.56109e+07	Rv3813c	-	hypothetical protein Rv3813c
1.5611e+07	Rv3817	-	phosphotransferase
1.5611e+07	Rv3826	fadD23	acyl-CoA synthetase
1.5611e+07	Rv3830c	-	transcriptional regulatory protein TetR-family
1.5611e+07	Rv3832c	-	hypothetical protein Rv3832c
1.5611e+07	Rv3834c	serS	seryl-tRNA synthetase
1.5611e+07	Rv3837c	-	phosphoglycerate mutase
1.5611e+07	Rv3839	-	hypothetical protein Rv3839
1.5611e+07	Rv3841	bfrB	bacterioferritin BfrB
1.5611e+07	Rv3842c	glpQ1	glycerophosphoryl diester phosphodiesterase
1.5611e+07	Rv3846	sodA	superoxide dismutase
1.5611e+07	Rv3853	menG	ribonuclease activity regulator protein RraA
1.5611e+07	Rv3854c	ethA	monooxygenase ETHA
1.5611e+07	Rv3855	ethR	transcriptional regulatory repressor protein (TETR-family) ETHR
1.5611e+07	Rv3858c	gltD	glutamate synthase subunit beta
1.5611e+07	Rv3859c	gltB	ferredoxin-dependent glutamate synthase
1.5611e+07	Rv3874	esxB	10 kDa culture filtrate antigen EsxB
1.5611e+07	Rv3890c	esxC	ESAT-6 like protein ESXC (ESAT-6 like protein 11)
1.5611e+07	Rv3904c	esxE	hypothetical protein Rv3904c
1.5611e+07	Rv3905c	esxF	hypothetical protein Rv3905c
1.5611e+07	Rv3913	trxB2	thioredoxin reductase TRXB2
1.56111e+07	Rv3914	trxC	thioredoxin trxC (TRX) (MPT46)
1.56111e+07	Rv3919c	gidB	glucose-inhibited division protein B
1.56111e+07	Rv3923c	rnpA	ribonuclease P
1.56111e+07	Rv3924c	rpmH	50S ribosomal protein L34
5.71167e+07	Rv0013	trpG	para-aminobenzoate synthase component II
5.71167e+07	Rv0035	fadD34	fatty-acid-CoA ligase
5.71167e+07	Rv0055	rpsR	30S ribosomal protein S18
5.71167e+07	Rv0062	celA1	endo-1,4-beta-glucanase
5.71167e+07	Rv0129c	fbpC	secreted antigen 85-C FBPC (85C) (antigen 85 complex C) (AG58C) (Mycolyl transferase 85C) (fibronectin-binding protein C)
5.71167e+07	Rv0162c	adhE1	zinc-type alcohol dehydrogenase E subunit
5.71167e+07	Rv0164	TB18.5	hypothetical protein Rv0164
5.71167e+07	Rv0183	-	lysophospholipase
5.71167e+07	Rv0234c	gabD1	succinic semialdehyde dehydrogenase
5.71167e+07	Rv0237	lpqI	lipoprotein LpqI
5.71167e+07	Rv0265c	-	periplasmic IRON-transport lipoprotein
5.71167e+07	Rv0285	PE5	PE family protein
5.71167e+07	Rv0296c	-	sulfatase
5.71167e+07	Rv0379	secE2	protein transport protein
5.71167e+07	Rv0382c	pyrE	orotate phosphoribosyltransferase
5.71167e+07	Rv0388c	PPE9	PPE family protein
5.71167e+07	Rv0438c	moeA2	molybdopterin biosynthesis protein MoeA2
5.71167e+07	Rv0456A	mazF1	function unknown
5.71167e+07	Rv0467	icl	isocitrate lyase
5.71167e+07	Rv0469	umaA	mycolic acid synthase
5.71167e+07	Rv0470c	pcaA	mycolic acid synthase pcaA (cyclopropane synthase)
5.71167e+07	Rv0480c	-	amidohydrolase
5.71167e+07	Rv0489	gpm1	phosphoglyceromutase
5.71167e+07	Rv0494	-	GntR family transcriptional regulator
5.71167e+07	Rv0501	galE2	UDP-glucose 4-epimerase
5.71167e+07	Rv0522	gabP	GABA permease GabP
5.71168e+07	Rv0536	galE3	UDP-glucose 4-epimerase
5.71168e+07	Rv0558	ubiE	ubiquinone/menaquinone biosynthesis methyltransferase
5.71168e+07	Rv0600c	-	two component sensor kinase
5.71168e+07	Rv0619	galTb	galactose-1-phosphate uridylyltransferase GalTb
5.71168e+07	Rv0675	echA5	enoyl-CoA hydratase
5.71168e+07	Rv0684	fusA1	elongation factor G
5.71168e+07	Rv0717	rpsN	30S ribosomal protein S14
5.71168e+07	Rv0734	mapA	methionine aminopeptidase
5.71168e+07	Rv0761c	adhB	zinc-containing alcohol dehydrogenase NAD dependent ADHB
5.71168e+07	Rv0774c	-	hypothetical protein Rv0774c
5.71168e+07	Rv0782	ptrBb	oligopeptidase B
5.71168e+07	Rv0787A	-	phosphoribosylformylglycinamidine synthase subunit PurS
5.71168e+07	Rv0794c	-	oxidoreductase
5.71168e+07	Rv0812	-	4-amino-4-deoxychorismate lyase
5.71168e+07	Rv0824c	desA1	acyl-
5.71168e+07	Rv0848	cysK2	cysteine synthase A CysK2
5.71168e+07	Rv0857	-	hypothetical protein Rv0857
5.71168e+07	Rv0928	pstS3	periplasmic phosphate-binding lipoprotein PSTS3 (PBP-3) (PSTS3) (PHOS1)
5.71168e+07	Rv0932c	pstS2	periplasmic phosphate-binding lipoprotein PSTS2 (PBP-2) (PSTS2)
5.71168e+07	Rv0934	pstS1	periplasmic phosphate-binding lipoprotein PSTS1 (PBP-1) (PSTS1)
5.71168e+07	Rv0949	uvrD1	ATP-dependent DNA helicase II UVRD1
5.71168e+07	Rv0978c	PE_PGRS17	PE-PGRS family protein
5.71168e+07	Rv0994	moeA1	molybdopterin biosynthesis protein MoeA1
5.71168e+07	Rv1000c	-	hypothetical protein Rv1000c
5.71168e+07	Rv1077	cbs	cystathionine beta-synthase CBS (Serine sulfhydrase) (Beta-thionase) (hemoprotein H-450)
5.71168e+07	Rv1089A	celA2a	endo-1,4-beta-glucanase
5.71168e+07	Rv1093	glyA	serine hydroxymethyltransferase
5.71168e+07	Rv1105	-	hypothetical protein Rv1105
5.71168e+07	Rv1121	zwf1	glucose-6-phosphate 1-dehydrogenase
5.71168e+07	Rv1135A	-	acetyl-CoA acetyltransferase
5.71168e+07	Rv1159A	phhB	pterin-4-alpha-carbinolamine dehydratase
5.71168e+07	Rv1169c	PE11	PE family protein
5.71168e+07	Rv1195	PE13	PE family protein
5.71168e+07	Rv1202	dapE	dipeptidase
5.71168e+07	Rv1223	htrA	serine protease HtrA
5.71168e+07	Rv1322A	-	hypothetical protein Rv1322A
5.71169e+07	Rv1330c	pncB1	nicotinic acid phosphoribosyltransferase pncb1
5.71169e+07	Rv1372	-	hypothetical protein Rv1372
5.71169e+07	Rv1384	carB	carbamoyl phosphate synthase large subunit
5.71169e+07	Rv1394c	cyp132	cytochrome P450 132
5.71169e+07	Rv1471	trxB1	thioredoxin TRXB1
5.71169e+07	Rv1489A	-	hypothetical protein Rv1489A
5.71169e+07	Rv1498A	-	hypothetical protein Rv1498A
5.71169e+07	Rv1549	fadD11.1	fatty-acid-CoA ligase
5.71169e+07	Rv1562c	treZ	maltooligosyltrehalose trehalohydrolase TreZ
5.71169e+07	Rv1563c	treY	maltooligosyltrehalose synthase TreY
5.71169e+07	Rv1564c	treX	maltooligosyltrehalose synthase TreX
5.71169e+07	Rv1569	bioF1	8-amino-7-oxononanoate synthase
5.71169e+07	Rv1600	hisC1	histidinol-phosphate aminotransferase
5.71169e+07	Rv1606	hisI	phosphoribosyl-AMP cyclohydrolase
5.71169e+07	Rv1625c	cya	membrane-anchored adenylyl cyclase Cya (ATP pyrophosphate-lyase) (adenylate cyclase)
5.71169e+07	Rv1715	fadB3	3-hydroxybutyryl-CoA dehydrogenase FADB3
5.71169e+07	Rv1731	gabD2	succinic semialdehyde dehydrogenase
5.71169e+07	Rv1788	PE18	PE family protein
5.71169e+07	Rv1791	PE19	PE family protein
5.71169e+07	Rv1806	PE20	PE family protein
5.71169e+07	Rv1844c	gnd1	6-phosphogluconate dehydrogenase
5.71169e+07	Rv1888A	-	hypothetical protein Rv1888A
5.71169e+07	Rv1981c	nrdF1	ribonucleotide-diphosphate reductase subunit beta
5.71169e+07	Rv1990A	-	dehydrogenase
5.71169e+07	Rv2057c	rpmG	50S ribosomal protein L33
5.71169e+07	Rv2099c	PE21	PE FAMILY PROTEIN
5.71169e+07	Rv2107	PE22	PE family protein
5.71169e+07	Rv2108	PPE36	PPE family protein
5.71169e+07	Rv2122c	hisE	phosphoribosyl-ATP pyrophosphatase
5.7117e+07	Rv2141c	-	hypothetical protein Rv2141c
5.7117e+07	Rv2188c	pimB	mannosyltransferase pimb
5.7117e+07	Rv2205c	-	hypothetical protein Rv2205c
5.7117e+07	Rv2232	-	hypothetical protein Rv2232
5.7117e+07	Rv2250c	-	transcriptional regulator
5.7117e+07	Rv2301	cut2	cutinase CUT2
5.7117e+07	Rv2332	mez	malate dehydrogenase
5.7117e+07	Rv2334	cysK1	cysteine synthase A CysK1
5.7117e+07	Rv2364c	era	GTP-binding protein Era
5.7117e+07	Rv2371	PE_PGRS40	PE-PGRS family protein
5.7117e+07	Rv2385	mbtJ	putative acetyl hydrolase MBTJ
5.7117e+07	Rv2386c	mbtI	salicylate synthase MbtI
5.7117e+07	Rv2397c	cysA1	sulfate-transport ATP-binding protein ABC transporter CysA1
5.7117e+07	Rv2430c	PPE41	PPE family protein
5.7117e+07	Rv2431c	PE25	PE family protein
5.7117e+07	Rv2461c	clpP	ATP-dependent Clp protease proteolytic subunit
5.7117e+07	Rv2465c	rpiB	ribose-5-phosphate isomerase
5.7117e+07	Rv2467	pepN	aminopeptidase N
5.7117e+07	Rv2579	dhaA	haloalkane dehalogenase
5.7117e+07	Rv2631	-	hypothetical protein Rv2631
5.7117e+07	Rv2677c	hemY	protoporphyrinogen oxidase
5.7117e+07	Rv2682c	dxs1	1-deoxy-D-xylulose-5-phosphate synthase
5.7117e+07	Rv2691	ceoB	TRK system potassium uptake protein CEOB
5.7117e+07	Rv2692	ceoC	TRK system potassium uptake protein CEOC
5.7117e+07	Rv2766c	fabG	3-ketoacyl-(acyl-carrier-protein) reductase
5.7117e+07	Rv2779c	-	LRP/AsnC family transcriptional regulator
5.7117e+07	Rv2847c	cysG	multifunctional uroporphyrinogen III methylase/precorrin-2 oxidase/ferrochelatase
5.7117e+07	Rv2849c	cobO	cob(I)yrinic acid a,c-diamide adenosyltransferase
5.7117e+07	Rv2855	mtr	mycothione/glutathione reductase
5.7117e+07	Rv2861c	mapB	methionine aminopeptidase
5.7117e+07	Rv2870c	dxr	1-deoxy-D-xylulose 5-phosphate reductoisomerase
5.7117e+07	Rv2911	dacB2	D-alanyl-D-alanine carboxypeptidase
5.7117e+07	Rv2922A	acyP	acylphosphatase
5.7117e+07	Rv2930	fadD26	acyl-CoA synthetase
5.7117e+07	Rv2970A	-	hypothetical protein Rv2970A
5.7117e+07	Rv2992c	gltX	glutamyl-tRNA synthetase
5.7117e+07	Rv2996c	serA1	D-3-phosphoglycerate dehydrogenase
5.7117e+07	Rv3003c	ilvB1	acetolactate synthase 1 catalytic subunit
5.7117e+07	Rv3020c	esxS	Esat-6 like protein esxS
5.7117e+07	Rv3022c	PPE48	PPE family protein
5.71171e+07	Rv3048c	nrdF2	ribonucleotide-diphosphate reductase subunit beta
5.71171e+07	Rv3065	mmr	multidrugs-transport integral membrane protein MMR
5.71171e+07	Rv3109	moaA1	molybdenum cofactor biosynthesis protein A
5.71171e+07	Rv3110	moaB1	pterin-4-alpha-carbinolamine dehydratase MoaB1
5.71171e+07	Rv3111	moaC	molybdenum cofactor biosynthesis protein C
5.71171e+07	Rv3112	moaD1	molybdenum cofactor biosynthesis protein D
5.71171e+07	Rv3116	moeB2	molybdenum cofactor biosynthesis protein MoeB
5.71171e+07	Rv3119	moaE1	molybdenum cofactor biosynthesis protein E
5.71171e+07	Rv3135	PPE50	PPE family protein
5.71171e+07	Rv3176c	mesT	epoxide hydrolase MesT
5.71171e+07	Rv3198A	-	glutaredoxin protein
5.71171e+07	Rv3206c	moeB1	molybdopterin biosynthesis-like protein MoeZ
5.71171e+07	Rv3214	gpm2	acid phosphatase
5.71171e+07	Rv3224A	-	hypothetical protein Rv3224A
5.71171e+07	Rv3224B	-	hypothetical protein Rv3224B
5.71171e+07	Rv3240c	secA1	preprotein translocase subunit SecA
5.71171e+07	Rv3264c	manB	D-alpha-D-mannose-1-phosphate guanylyltransferase MANB (D-alpha-D-heptose-1-phosphate guanylyltransferase)
5.71171e+07	Rv3265c	wbbL1	dTDP-RHA:A-D-GlcNAc-diphosphoryl polyprenol
5.71171e+07	Rv3293	pcd	piperideine-6-carboxilic acid dehydrogenase
5.71171e+07	Rv3305c	amiA1	N-acyl-L-amino acid amidohydrolase
5.71171e+07	Rv3306c	amiB1	amidohydrolase AmiB1
5.71171e+07	Rv3323c	moaX	MOAD-MOAE fusion protein MOAX
5.71171e+07	Rv3337	-	hypothetical protein Rv3337
5.71171e+07	Rv3374	echA18.1	enoyl-CoA hydratase
5.71171e+07	Rv3395c	-	hypothetical protein Rv3395c
5.71171e+07	Rv3398c	idsA1	multifunctional dimethylallyltransferase/farnesyl diphosphate synthetase/ farnesyltranstransferase
5.71171e+07	Rv3425	PPE57	PPE family protein
5.71171e+07	Rv3429	PPE59	PPE family protein
5.71171e+07	Rv3477	PE31	PE family protein
5.71171e+07	Rv3515c	fadD19	acyl-CoA synthetase
5.71171e+07	Rv3538	-	dehydrogenase
5.71171e+07	Rv3566c	nat	arylamine n-acetyltransferase nat (arylamine acetylase)
5.71171e+07	Rv3580c	cysS	cysteinyl-tRNA synthetase
5.71171e+07	Rv3596c	clpC1	ATP-dependent protease ATP-binding subunit ClpC1
5.71171e+07	Rv3607c	folB	dihydroneopterin aldolase FolB
5.71171e+07	Rv3608c	folP1	dihydropteroate synthase
5.71171e+07	Rv3622c	PE32	PE family protein
5.71171e+07	Rv3634c	galE1	UDP-glucose 4-epimerase GALE1 (galactowaldenase) (UDP-galactose 4-epimerase) (uridine diphosphate galactose 4-epimerase) (uridine diphospho-galactose 4-epimerase)
5.71171e+07	Rv3650	PE33	PE family protein
5.71171e+07	Rv3659c	-	hypothetical protein Rv3659c
5.71171e+07	Rv3674c	nth	endonuclease III
5.71171e+07	Rv3722c	-	hypothetical protein Rv3722c
5.71171e+07	Rv3724B	cut5b	cutinase
5.71172e+07	Rv3739c	PPE67	PPE family protein
5.71172e+07	Rv3784	-	dTDP-glucose 4,6-dehydratase
5.71172e+07	Rv3799c	accD4	propionyl-CoA carboxylase beta chain
5.71172e+07	Rv3803c	fbpD	secreted MPT51/MPB51 antigen protein FBPD (MPT51/MPB51 antigen 85 complex C) (AG58C) (Mycolyl transferase 85C) (fibronectin-binding protein C) (85C)
5.71172e+07	Rv3872	PE35	PE family-related protein
5.71172e+07	Rv3875	esxA	6 kDa early secretory antigenic target ESXA (ESAT-6)
5.71172e+07	Rv3893c	PE36	PE family protein
5.71172e+07	Rv3907c	pcnA	poly(A) polymerase
5.71172e+07	Rv3918c	parA	chromosome partitioning protein ParA
15607955gi.1	Rv0815c	cysA2	thiosulfate sulfurtransferase CysA2
